# Supplementary material for: Embryonic attenuated Wnt/β-catenin signaling defines niche location and long-term stem cell fate in hair follicle
Source: eLife journal article supplement (doi:10.7554/elife.10567), 2015-12-14
Supplement: supp [file elife-10567-supp-v1.zip]

Archive with 7 entries (7 files):
- elife_poa_e10567_Figure_6_figure_supplement_1.pdf
- elife_poa_e10567_Figure_3_figure_supplement_1.pdf
- elife_poa_e10567_Figure_3_source_data_1.xlsx
- elife_poa_e10567_Figure_5_figure_supplement_1.pdf
- elife_poa_e10567_Figure_1_figure_supplement_2.pdf
- elife_poa_e10567_Figure_1_figure_supplement_1.pdf
- elife_poa_e10567_Figure_2_figure_supplement_1.pdf
