# Supplementary material for: Embryonic attenuated Wnt/β-catenin signaling defines niche location and long-term stem cell fate in hair follicle
Source: eLife journal article supplement (doi:10.7554/elife.10567), 2015-12-14
Supplement: supp [file elife-10567-supp-v1.zip › elife_poa_e10567_Figure_3_source_data_1.xlsx]

## Sheet: Sheet1
test_id	locus	Nfatc1	Shh	log2(fold_change)	p_value	q_value	significant		Nfatc1-1	Nfatc1-2	Shh-1	Shh-2
Gm973	chr1:59516263-59634509	20.709	0.0942379	-7.77973	0.0029	0.014802	yes	Gm973	20.2567	19.8134	0.0533526	0.12899
Lgi3	chr14:70530820-70538324	14.1363	0.204726	-6.10956	5e-05	0.000401447	yes	Lgi3	14.9053	12.4472	0.15167	0.244458
Cyp4b1	chr4:115624727-115647705	8.41987	0.155396	-5.75978	0.01	0.0420828	yes	Cyp4b1	9.43483	6.85691	0.214323	0.0863553
Gjb4	chr4:127351085-127354081	22.3862	0.459066	-5.60776	5e-05	0.000401447	yes	Gjb4	25.9194	17.396	0.428195	0.460059
Slco2a1	chr9:103008488-103087849	7.56403	0.156938	-5.59088	5e-05	0.000401447	yes	Slco2a1	7.74349	6.89226	0.189266	0.114397
Serpina9	chr12:103996619-104013652	20.5032	0.44116	-5.5384	5e-05	0.000401447	yes	Serpina9	21.9887	17.6833	0.179309	0.674299
Trf	chr9:103208875-103230286	15.985	0.363576	-5.45832	5e-05	0.000401447	yes	Trf	16.1552	14.7744	0.295399	0.408089
Dio2	chr12:90724551-90738438	21.5845	0.504357	-5.4194	5e-05	0.000401447	yes	Dio2	19.4555	22.3087	0.453626	0.522262
Lmcd1	chr6:112273757-112330423	51.9265	1.45406	-5.15831	5e-05	0.000401447	yes	Lmcd1	48.2798	52.1936	1.87111	0.942378
Syn2	chr6:115134901-115282626	2.77422	0.0797848	-5.11982	0.00305	0.0154449	yes	Syn2	2.49953	2.86835	0.0744154	0.0799616
Casp1	chr9:5298516-5307281	8.02436	0.231587	-5.11476	0.0052	0.0243238	yes	Casp1	7.5357	7.99076	0.338874	0.109228
Pcdh20	chr14:88464746-88471396	9.86556	0.305256	-5.01431	5e-05	0.000401447	yes	Pcdh20	9.42122	9.66782	0.270689	0.319955
Nlgn1	chr3:25431840-26331909	3.5704	0.117864	-4.92089	5e-05	0.000401447	yes	Nlgn1	3.27887	3.62954	0.061865	0.166192
Gm6537	chr7:28756173-28766524	168.965	5.58083	-4.9201	5e-05	0.000401447	yes	Gm6537	148.077	178.856	2.98981	7.80863
Atoh1	chr6:64729145-64731235	6.93927	0.241419	-4.84517	0.0005	0.00322686	yes	Atoh1	6.20709	7.21981	0.237478	0.229648
Hsd11b2	chr8:105518745-105523988	4.9755	0.174581	-4.83287	0.00645	0.0290894	yes	Hsd11b2	5.2316	4.39558	0.162838	0.174962
Defb1	chr8:21776554-21795185	25.6554	0.920408	-4.80085	5e-05	0.000401447	yes	Defb1	28.0993	21.5417	0.607048	1.17386
Stfa1	chr16:36277147-36285371	70.2977	2.85008	-4.6244	5e-05	0.000401447	yes	Stfa1	70.4862	65.534	3.21405	2.30062
Pou4f3	chr18:42394596-42396093	11.9981	0.531722	-4.49599	5e-05	0.000401447	yes	Pou4f3	10.7719	12.4434	0.279128	0.74971
Pla2g7	chr17:43568450-43612201	37.2788	1.7071	-4.44874	5e-05	0.000401447	yes	Pla2g7	37.7129	34.4185	1.61932	1.68377
Lpl	chr8:68880554-68906932	21.0237	0.963545	-4.44752	5e-05	0.000401447	yes	Lpl	21.7149	18.9643	0.801069	1.06331
Ltbp2	chr12:84783211-84879755	3.2114	0.15026	-4.41767	5e-05	0.000401447	yes	Ltbp2	2.61084	3.60295	0.199066	0.0916748
Lhx3	chr2:26200211-26206556	4.0959	0.195387	-4.38977	0.0009	0.00544281	yes	Lhx3	3.9411	3.98411	0.0895139	0.288543
Has2	chr15:56665626-56694546	7.16166	0.346627	-4.36884	5e-05	0.000401447	yes	Has2	6.78173	7.07547	0.381402	0.289292
Miat	chr5:112213227-112228948	21.9858	1.06524	-4.36732	5e-05	0.000401447	yes	Miat	18.6477	23.8929	0.438958	1.62219
Ncald	chr15:37366174-37792428	23.2249	1.19844	-4.27644	5e-05	0.000401447	yes	Ncald	21.8393	23.0988	0.927596	1.39129
Lifr	chr15:7129571-7197489	51.1645	2.73411	-4.226	5e-05	0.000401447	yes	Lifr	48.4027	50.5962	2.2164	3.07388
Insm1	chr2:146221996-146225018	5.48733	0.316371	-4.11641	5e-05	0.000401447	yes	Insm1	5.10592	5.5116	0.0960605	0.516091
Zfpm2	chr15:40655041-41104592	4.0585	0.238849	-4.08678	5e-05	0.000401447	yes	Zfpm2	3.56494	4.28792	0.247418	0.214735
Ramp1	chr1:91179821-91225196	16.6618	1.00999	-4.04413	5e-05	0.000401447	yes	Ramp1	15.2358	17.0033	0.959104	0.995138
Sdr16c5	chr4:3995941-4019663	47.5026	2.99015	-3.98971	5e-05	0.000401447	yes	Sdr16c5	49.9062	42.0074	2.63322	3.15248
Adrb2	chr18:62177815-62179959	8.39425	0.546656	-3.9407	5e-05	0.000401447	yes	Adrb2	4.96754	11.2746	0.462019	0.595715
Hepacam2	chr6:3457088-3494498	2.36294	0.155972	-3.92123	0.003	0.015236	yes	Hepacam2	2.49647	2.07562	0.0883057	0.213486
Apoe	chr7:19696243-19699166	762.793	51.2217	-3.89646	5e-05	0.000401447	yes	Apoe	866.339	609.602	51.9582	47.1515
Palld	chr8:61515020-61902690	15.6886	1.08323	-3.85631	5e-05	0.000401447	yes	Palld	14.4676	15.8886	0.968528	1.12743
Atp8a2	chr14:59647740-60086834	1.68281	0.1187	-3.82548	0.00095	0.0057028	yes	Atp8a2	1.59073	1.66537	0.10398	0.125695
Col9a3	chr2:180598221-180642691	45.4136	3.23545	-3.81109	5e-05	0.000401447	yes	Col9a3	42.7017	45.1698	3.07076	3.18957
Kcnk7	chr19:5704475-5707101	12.0926	0.864381	-3.80632	5e-05	0.000401447	yes	Kcnk7	11.631	11.7671	1.05454	0.617969
Lrrn3	chr12:41451667-41486057	5.267	0.394245	-3.73982	5e-05	0.000401447	yes	Lrrn3	5.15216	5.03904	0.275096	0.487735
Mfap3l	chr8:60632859-60676731	10.5618	0.806033	-3.71187	5e-05	0.000401447	yes	Mfap3l	9.79911	10.6371	0.904726	0.65488
Plxdc1	chr11:97923236-97986446	1.25631	0.0975033	-3.68759	0.00535	0.0248919	yes	Plxdc1	1.1852	1.24564	0.134528	0.054133
Plcl1	chr1:55405945-55754285	8.2545	0.662786	-3.63857	5e-05	0.000401447	yes	Plcl1	7.32006	8.65171	0.658985	0.62345
Krt73	chr15:101793307-101802332	10.5478	0.848852	-3.63529	5e-05	0.000401447	yes	Krt73	12.2714	8.13776	0.82746	0.814997
Vsnl1	chr12:11325244-11436649	14.4618	1.16811	-3.62999	5e-05	0.000401447	yes	Vsnl1	13.6342	14.3481	0.929121	1.33108
Lgr5	chr10:115450313-115587780	45.3826	3.70613	-3.61416	5e-05	0.000401447	yes	Lgr5	42.3953	45.4163	3.34198	3.82906
Ephb1	chr9:101922127-102354693	1.43041	0.117027	-3.61153	0.00015	0.00109224	yes	Ephb1	1.28183	1.4859	0.12539	0.101046
Dll3	chr7:28293554-28301785	2.96422	0.247082	-3.58459	0.0007	0.00433205	yes	Dll3	2.71471	3.0208	0.183053	0.29503
Crtac1	chr19:42283036-42431783	4.01287	0.340794	-3.55766	5e-05	0.000401447	yes	Crtac1	4.25496	3.5096	0.298535	0.360873
Cdh13	chr8:118283754-119323448	11.6043	0.98614	-3.55672	5e-05	0.000401447	yes	Cdh13	12.1659	10.2875	1.07582	0.832282
Phactr1	chr13:42680622-43138512	1.65489	0.142458	-3.53814	5e-05	0.000401447	yes	Phactr1	1.75444	1.44764	0.0747997	0.200844
Cish	chr9:107296688-107301961	15.7893	1.3787	-3.51757	5e-05	0.000401447	yes	Cish	15.7526	14.7984	1.19104	1.47663
P2ry1	chr3:61002794-61008979	9.85875	0.872185	-3.4987	5e-05	0.000401447	yes	P2ry1	9.62232	9.45353	0.934496	0.753109
Kirrel2	chr7:30447765-30457515	2.1501	0.192817	-3.4791	0.0005	0.00322686	yes	Kirrel2	1.80705	2.35321	0.123754	0.24933
Tmem180	chr19:46356879-46375254	2.91844	0.264457	-3.46409	0.00055	0.00349958	yes	Tmem180	2.96564	2.6813	0.30265	0.209053
Neurl1b	chr17:26414964-26446342	27.9951	2.57039	-3.44512	5e-05	0.000401447	yes	Neurl1b	28.0186	26.1496	2.40131	2.57218
Col16a1	chr4:130047839-130099277	79.9728	7.39357	-3.43517	5e-05	0.000401447	yes	Col16a1	76.5231	78.2175	6.60909	7.69684
Aldh3a1	chr11:61208741-61218416	5.50158	0.510091	-3.43102	5e-05	0.000401447	yes	Aldh3a1	6.87764	3.76746	0.575072	0.411912
Sfrp1	chr8:23411501-23449632	37.7634	3.54025	-3.41506	5e-05	0.000401447	yes	Sfrp1	37.1544	35.9146	3.58931	3.26079
Ppara	chr15:85735563-85806851	1.33105	0.125439	-3.4075	5e-05	0.000401447	yes	Ppara	1.35025	1.22521	0.116996	0.125717
Dnahc7b	chr1:46066737-46373550	2.49604	0.237579	-3.39316	5e-05	0.000401447	yes	Dnahc7b	1.9915	2.83811	0.241098	0.218597
Acer1	chr17:56953489-56982126	2.9342	0.280727	-3.38573	0.00055	0.00349958	yes	Acer1	2.80833	2.8691	0.282762	0.260422
Tinagl1	chr4:130165599-130175122	2.86874	0.275883	-3.37829	0.00065	0.00404312	yes	Tinagl1	2.17853	3.37224	0.204392	0.329418
Rab3b	chr4:108879069-108972077	4.24608	0.412239	-3.36458	5e-05	0.000401447	yes	Rab3b	4.35553	3.86028	0.376987	0.42066
Mitf	chr6:97807057-98021358	11.2598	1.09519	-3.36193	5e-05	0.000401447	yes	Mitf	9.6162	12.1705	0.849745	1.26935
Acsbg1	chr9:54604996-54661885	11.6918	1.14536	-3.35162	5e-05	0.000401447	yes	Acsbg1	12.7685	9.85414	1.08644	1.12973
Tgfbi	chr13:56609602-56639339	42.1916	4.17157	-3.33829	5e-05	0.000401447	yes	Tgfbi	37.7903	43.8469	4.2585	3.81314
Bcas1	chr2:170346990-170427845	2.8973	0.293165	-3.30493	0.0001	0.000758012	yes	Bcas1	2.61697	2.98907	0.196934	0.370316
Itga1	chr13:114958080-115101964	8.73822	0.89395	-3.28907	5e-05	0.000401447	yes	Itga1	7.90918	8.99855	0.613707	1.11601
Dlk2	chr17:46297420-46328023	17.0874	1.76396	-3.27604	0.0024	0.0126031	yes	Dlk2	16.9682	16.0945	0.935692	2.47742
Rbm24	chr13:46418299-46431099	1.97254	0.204397	-3.27061	0.00025	0.00173352	yes	Rbm24	1.69143	2.12527	0.299081	0.0964103
Fam26e	chr10:34037596-34109815	2.99372	0.315738	-3.24514	0.00115	0.00667996	yes	Fam26e	3.03068	2.76192	0.338306	0.27262
Ebf1	chr11:44618133-45005172	1.33628	0.141399	-3.24038	0.00885	0.0380569	yes	Ebf1	1.22247	1.36313	0.131886	0.14171
Kctd14	chr7:97451333-97459557	10.5037	1.11412	-3.23692	5e-05	0.000401447	yes	Kctd14	10.4237	9.90009	1.05695	1.09878
1190005I06Rik	chr8:120608601-120634382	7.09419	0.762689	-3.21747	0.00195	0.0105068	yes	1190005I06Rik	7.99439	5.73228	0.960082	0.515658
Fst	chr13:114452261-114458730	140.573	15.1496	-3.21397	5e-05	0.000401447	yes	Fst	133.394	138.603	10.652	18.6611
Tshz2	chr2:169633645-169888504	8.24285	0.890335	-3.21072	5e-05	0.000401447	yes	Tshz2	8.33632	7.6129	0.887898	0.834826
Ugt1a1	chr1:88055410-88220002	6.22938	0.678477	-3.19872	0.00115	0.00667996	yes	Ugt1a1	6.97397	5.07936	0.674407	0.638388
Wnt5a	chr14:28505472-28525515	26.0916	2.85298	-3.19304	5e-05	0.000401447	yes	Wnt5a	25.6319	24.8532	2.87407	2.64621
Nrcam	chr12:44328884-44601846	2.16531	0.237832	-3.18656	5e-05	0.000401447	yes	Nrcam	1.82445	2.36524	0.152642	0.307543
Fgf1	chr18:38838672-38971274	2.36266	0.261105	-3.17771	0.0001	0.000758012	yes	Fgf1	2.1982	2.37336	0.268852	0.236364
2900011O08Rik	chr16:13981701-14101494	2.44761	0.276996	-3.14344	0.0003	0.00205109	yes	2900011O08Rik	2.43853	2.29739	0.334059	0.201905
Egflam	chr15:7206119-7398304	10.9303	1.24097	-3.13879	5e-05	0.000401447	yes	Egflam	9.80574	11.3434	1.24993	1.15123
Sbspon	chr1:15853861-15892722	4.24024	0.485103	-3.12778	5e-05	0.000401447	yes	Sbspon	3.7753	4.4292	0.424948	0.513685
Nbl1	chr4:139082291-139092970	50.2395	5.79321	-3.11639	5e-05	0.000401447	yes	Nbl1	45.664	51.5452	5.95191	5.25745
Myrip	chr9:120304072-120474834	1.42607	0.169233	-3.07496	5e-05	0.000401447	yes	Myrip	1.1446	1.61472	0.199092	0.12836
BC016579	chr16:45626847-45654118	6.86011	0.832966	-3.0419	5e-05	0.000401447	yes	BC016579	6.73173	6.54201	0.811974	0.799745
Scel	chr14:103513340-103613346	35.9797	4.38479	-3.0366	5e-05	0.000401447	yes	Scel	34.683	34.9346	3.99129	4.49291
Apol8	chr15:77748612-77755229	1.67253	0.203963	-3.03565	0.00675	0.0302523	yes	Apol8	1.21521	2.021	0.218541	0.17611
Cdc42ep3	chr17:79334024-79355091	40.3043	4.92721	-3.03209	5e-05	0.000401447	yes	Cdc42ep3	38.3672	39.6182	4.46437	5.06937
Tox	chr4:6687385-6990723	9.99358	1.22891	-3.02362	5e-05	0.000401447	yes	Tox	8.74222	10.5945	1.22556	1.15227
Smad9	chr3:54755581-54801257	1.1381	0.140444	-3.01856	0.00035	0.00234563	yes	Smad9	0.880904	1.32123	0.158327	0.11342
Apba1	chr19:23758875-23949597	1.05265	0.130912	-3.00735	0.0001	0.000758012	yes	Apba1	0.945142	1.09164	0.0707764	0.182528
Timp3	chr10:86048745-86498896	102.065	12.9958	-2.97337	5e-05	0.000401447	yes	Timp3	99.8231	97.6646	11.9164	13.2294
Olfml3	chr3:103735393-103738001	10.4111	1.33312	-2.96523	5e-05	0.000401447	yes	Olfml3	10.7822	9.36235	1.45438	1.12511
Id4	chr13:48261426-48264036	91.0489	11.7607	-2.95266	5e-05	0.000401447	yes	Id4	87.3431	88.8289	11.9195	10.8365
Dlg2	chr7:91090785-92449246	2.22549	0.293136	-2.92448	5e-05	0.000401447	yes	Dlg2	1.89916	2.40698	0.285827	0.281367
Col25a1	chr3:130180844-130599883	3.9887	0.531452	-2.90791	5e-05	0.000401447	yes	Col25a1	3.83637	3.88143	0.542178	0.486137
Far2	chr6:148047415-148444352	7.80004	1.04067	-2.90597	0.0025	0.0130496	yes	Far2	9.02877	6.06364	0.73603	1.27758
Sgk1	chr10:21882183-21999902	99.1501	13.2616	-2.90236	5e-05	0.000401447	yes	Sgk1	85.3938	106.453	12.3756	13.2844
Ppp1r14a	chr7:29289319-29293390	22.2146	2.98279	-2.89678	5e-05	0.000401447	yes	Ppp1r14a	20.6173	22.3661	2.97539	2.79606
Adamts19	chr18:58836763-59053678	31.2842	4.21086	-2.89325	5e-05	0.000401447	yes	Adamts19	27.2448	33.2875	3.98537	4.16228
Abca12	chr1:71243089-71414910	6.05017	0.814738	-2.89257	5e-05	0.000401447	yes	Abca12	5.83867	5.86789	0.8529	0.72355
Sorcs2	chr5:36017180-36398139	15.2606	2.07367	-2.87955	5e-05	0.000401447	yes	Sorcs2	14.7122	14.8157	2.33943	1.67294
Shisa2	chr14:59625280-59631660	14.9114	2.03152	-2.87579	5e-05	0.000401447	yes	Shisa2	14.5394	14.313	1.90276	2.02806
Elmo1	chr13:20090506-20608353	26.0548	3.57361	-2.8661	5e-05	0.000401447	yes	Elmo1	24.8004	25.6135	3.31555	3.59908
Tnfrsf11b	chr15:54250618-54278484	11.0276	1.51486	-2.86385	5e-05	0.000401447	yes	Tnfrsf11b	11.539	9.79837	1.93083	1.0003
Rasd2	chr8:75213943-75224113	4.72759	0.653531	-2.85478	5e-05	0.000401447	yes	Rasd2	4.64878	4.4987	0.484167	0.78036
Fbn2	chr18:58008622-58209926	12.5871	1.75819	-2.83979	5e-05	0.000401447	yes	Fbn2	10.9901	13.365	1.64213	1.75982
Prickle2	chr6:92370891-92706184	2.02144	0.283487	-2.83403	5e-05	0.000401447	yes	Prickle2	1.92637	1.98495	0.35257	0.195952
Abcb9	chr5:124061856-124095798	2.23842	0.314222	-2.83263	5e-05	0.000401447	yes	Abcb9	2.2217	2.10946	0.375323	0.232669
Ret	chr6:118151747-118197744	1.11217	0.156913	-2.82535	5e-05	0.000401447	yes	Ret	1.06584	1.08612	0.153092	0.150522
Scnn1b	chr7:121865037-121918728	4.03594	0.57425	-2.81315	5e-05	0.000401447	yes	Scnn1b	4.25667	3.55253	0.469911	0.641214
Prelp	chr1:133910303-133921401	4.26338	0.607818	-2.81029	5e-05	0.000401447	yes	Prelp	3.15945	5.08984	0.532441	0.643637
Igf1	chr10:87859055-87937047	1.59917	0.228885	-2.80462	5e-05	0.000401447	yes	Igf1	1.28078	1.81348	0.0795406	0.363333
Pla2g2f	chr4:138750532-138757598	34.1075	4.91149	-2.79586	5e-05	0.000401447	yes	Pla2g2f	34.6263	31.3688	5.67561	3.82772
Fam189a2	chr19:23972749-24031019	2.19618	0.318535	-2.78547	0.00055	0.00349958	yes	Fam189a2	2.09912	2.1503	0.307042	0.309296
Cd109	chr9:78615545-78716260	61.0223	9.00671	-2.76027	5e-05	0.000401447	yes	Cd109	63.0747	54.9984	8.26744	9.15979
Krt35	chr11:100092191-100096224	1.48455	0.219125	-2.7602	0.01205	0.0490848	yes	Krt35	1.52304	1.34945	0.234788	0.1892
Fcgrt	chr7:45092992-45103822	9.30013	1.37312	-2.75979	5e-05	0.000401447	yes	Fcgrt	8.23793	9.75705	1.62683	1.03004
Cyp27a1	chr1:74713573-74737890	1.44801	0.214579	-2.75448	0.00805	0.0352123	yes	Cyp27a1	1.42424	1.37754	0.158975	0.256218
Tbx1	chr16:18581712-18586969	153.536	22.8222	-2.75006	5e-05	0.000401447	yes	Tbx1	145.179	151.9	25.0607	19.0983
Avil	chr10:127000708-127020994	1.19725	0.178622	-2.74474	0.0023	0.012167	yes	Avil	0.975874	1.34071	0.191385	0.154234
Tmem108	chr9:103482935-103761837	4.50948	0.678767	-2.73197	5e-05	0.000401447	yes	Tmem108	4.57029	4.15517	0.518867	0.79449
Stom	chr2:35313989-35337009	38.2425	5.76401	-2.73003	5e-05	0.000401447	yes	Stom	36.0506	37.9455	6.31445	4.83842
Cd44	chr2:102811141-102901665	187.033	28.1992	-2.72957	5e-05	0.000401447	yes	Cd44	183.24	178.653	26.2269	28.3361
Tfap2e	chr4:126716002-126736269	11.7811	1.78764	-2.72035	5e-05	0.000401447	yes	Tfap2e	10.897	11.8984	1.87359	1.58534
Col12a1	chr9:79598990-79718678	24.7115	3.75226	-2.71935	5e-05	0.000401447	yes	Col12a1	20.5688	27.246	3.36969	3.89062
Fgf2	chr3:37348652-37404830	4.17062	0.640958	-2.70196	0.01205	0.0490848	yes	Fgf2	3.97098	4.09882	0.686854	0.553346
Pitpnm3	chr11:72047527-72135889	6.031	0.932543	-2.69315	5e-05	0.000401447	yes	Pitpnm3	5.62841	6.04106	0.595792	1.2086
Tns1	chr1:73910230-74124447	12.0286	1.87018	-2.68521	5e-05	0.000401447	yes	Tns1	11.6701	11.6041	1.88703	1.73162
Ephb6	chr6:41605481-41620507	107.03	16.6652	-2.6831	5e-05	0.000401447	yes	Ephb6	101.014	106.08	18.3784	13.8674
Ehf	chr2:103263432-103303196	9.17	1.43606	-2.6748	5e-05	0.000401447	yes	Ehf	8.8235	8.91968	1.62571	1.15295
A730056A06Rik	chr7:73313805-73419899	4.30559	0.675486	-2.67221	0.00795	0.0348498	yes	A730056A06Rik	4.39412	3.93683	0.781922	0.525086
Slc12a2	chr18:57878677-57946821	44.8481	7.08178	-2.66286	5e-05	0.000401447	yes	Slc12a2	33.716	53.0614	6.89981	6.80283
Hoxa2	chr6:52162510-52164831	15.6461	2.49447	-2.649	5e-05	0.000401447	yes	Hoxa2	18.043	12.2309	2.59208	2.23451
Lap3	chr5:45493373-45512691	114.845	18.3721	-2.6441	5e-05	0.000401447	yes	Lap3	118.35	103.866	17.8796	17.6688
Manba	chr3:135485610-135571403	3.05979	0.490558	-2.64094	5e-05	0.000401447	yes	Manba	2.68369	3.23674	0.234687	0.714503
Vdr	chr15:97854426-97908296	51.7458	8.37762	-2.62683	5e-05	0.000401447	yes	Vdr	53.8842	46.2396	8.49839	7.7116
Inhbb	chr1:119415464-119422248	37.3461	6.08063	-2.61866	5e-05	0.000401447	yes	Inhbb	35.7471	36.5145	6.17554	5.58998
Tbc1d4	chr14:101442359-101609191	19.4587	3.22765	-2.59186	5e-05	0.000401447	yes	Tbc1d4	16.9103	20.7407	3.5339	2.71133
Sox2	chr3:34560380-34677993	5.91928	0.98251	-2.59088	5e-05	0.000401447	yes	Sox2	5.14356	6.30976	0.678626	1.22245
Rerg	chr6:137054824-137170496	27.028	4.48633	-2.59085	5e-05	0.000401447	yes	Rerg	27.428	24.8689	4.20283	4.47784
Grm4	chr17:27422387-27503304	2.83749	0.472092	-2.58748	5e-05	0.000401447	yes	Grm4	2.65595	2.83435	0.651102	0.262356
Prss12	chr3:123446912-123506602	2.29534	0.381899	-2.58744	0.0002	0.00141578	yes	Prss12	2.11795	2.32335	0.0749085	0.664035
Col5a3	chr9:20770049-20815034	1.08411	0.181612	-2.57758	0.0002	0.00141578	yes	Col5a3	0.874525	1.22314	0.0772992	0.274105
Unc79	chr12:102948858-103183997	2.05586	0.344948	-2.57529	5e-05	0.000401447	yes	Unc79	1.76547	2.21244	0.294489	0.372956
Slc16a7	chr10:125227484-125328535	16.9728	2.86165	-2.56831	5e-05	0.000401447	yes	Slc16a7	18.3914	14.4495	2.92129	2.61575
Dact2	chr17:14195229-14203831	7.97981	1.36309	-2.54947	5e-05	0.000401447	yes	Dact2	7.40879	8.03147	1.52224	1.11522
Itga4	chr2:79255425-79428988	3.61851	0.618272	-2.54908	5e-05	0.000401447	yes	Itga4	3.55745	3.44407	0.539858	0.656446
Sema3e	chr5:14025275-14256689	35.9793	6.15016	-2.54847	5e-05	0.000401447	yes	Sema3e	32.8243	36.7926	5.50958	6.39047
Itpka	chr2:119742336-119751253	2.75678	0.47454	-2.53838	0.00125	0.00717207	yes	Itpka	2.88711	2.44704	0.111262	0.806934
Edn1	chr13:42301269-42307989	8.06496	1.39323	-2.53323	5e-05	0.000401447	yes	Edn1	8.6362	6.96882	1.34297	1.35282
Slc50a1	chr3:89268245-89270570	14.6306	2.52797	-2.53294	5e-05	0.000401447	yes	Slc50a1	14.2931	14.0159	2.6613	2.2301
Cpm	chr10:117629499-117687352	5.26589	0.915551	-2.52396	5e-05	0.000401447	yes	Cpm	5.43328	4.75577	0.891629	0.879886
Mir22hg	chr11:75461538-75466690	2.10073	0.367224	-2.51616	0.0018	0.00983312	yes	Mir22hg	2.01035	2.0544	0.342523	0.368024
Slc25a45	chr19:5878465-5885768	2.46906	0.432796	-2.5122	0.00105	0.00619942	yes	Slc25a45	2.64082	2.1366	0.219195	0.618229
Trpc4	chr3:54156056-54318471	1.26208	0.223527	-2.49728	0.00035	0.00234563	yes	Trpc4	1.54265	0.899363	0.239496	0.19301
Fam132a	chr4:155962311-155966629	142.292	25.2285	-2.49573	5e-05	0.000401447	yes	Fam132a	142.782	132.541	25.5166	23.2984
Itga8	chr2:12106659-12312315	3.66465	0.654261	-2.48574	5e-05	0.000401447	yes	Itga8	3.36991	3.72088	0.635546	0.630394
Tns4	chr11:99065677-99089306	27.2766	4.87598	-2.4839	5e-05	0.000401447	yes	Tns4	28.1408	24.6371	4.64592	4.78869
Ptprv	chr1:135108497-135132575	26.8391	4.82338	-2.47622	5e-05	0.000401447	yes	Ptprv	28.5442	23.3873	4.96764	4.36519
Grb14	chr2:64912481-65022766	38.4548	7.00918	-2.45585	5e-05	0.000401447	yes	Grb14	35.8407	38.5661	5.94547	7.6167
Cyp27b1	chr10:127048245-127053006	1.53536	0.281721	-2.44624	0.0025	0.0130496	yes	Cyp27b1	1.91642	1.05437	0.283763	0.261344
Scd1	chr19:44394449-44407709	45.6536	8.38347	-2.44511	5e-05	0.000401447	yes	Scd1	46.8298	41.5061	9.14846	7.07285
Ccdc164	chr5:30341662-30366708	1.08043	0.198736	-2.44268	0.00865	0.0373548	yes	Ccdc164	1.08925	1.00128	0.174094	0.210443
Kcnh1	chr1:192190871-192510158	2.86103	0.527159	-2.44023	5e-05	0.000401447	yes	Kcnh1	2.51057	3.02529	0.570747	0.449261
Gpd1	chr15:99717592-99725007	1.90771	0.351956	-2.43837	0.0006	0.00377055	yes	Gpd1	1.90959	1.78167	0.174565	0.506441
Prdm1	chr10:44437174-44458687	37.7217	6.96508	-2.43718	5e-05	0.000401447	yes	Prdm1	34.5085	38.4798	7.52007	5.95677
Mgst1	chr6:138140536-138156752	59.5482	10.9994	-2.43663	5e-05	0.000401447	yes	Mgst1	65.438	49.7827	11.8387	9.44427
Cpt1a	chr19:3323300-3385733	10.8684	2.01764	-2.4294	5e-05	0.000401447	yes	Cpt1a	10.1967	10.8327	1.37184	2.53212
Ak1	chr2:32621757-32635058	10.8938	2.04018	-2.41675	5e-05	0.000401447	yes	Ak1	11.3907	9.68798	1.7307	2.21687
Phyhip	chr14:70457516-70468824	61.2924	11.5176	-2.41187	5e-05	0.000401447	yes	Phyhip	61.1109	57.4848	11.3294	10.9562
H2-T23	chr17:35994503-36038174	55.0738	10.3913	-2.40598	5e-05	0.000401447	yes	H2-T23	66.9011	39.662	13.0799	7.02649
Col8a1	chr16:57624255-57754737	8.43763	1.59471	-2.40354	5e-05	0.000401447	yes	Col8a1	8.15257	8.17353	1.29564	1.79
Aldh1a7	chr19:20692952-20727556	3.86252	0.730132	-2.40331	5e-05	0.000401447	yes	Aldh1a7	4.33755	3.1361	0.868432	0.544312
Kank4	chr4:98754891-98817537	4.24306	0.806765	-2.39488	5e-05	0.000401447	yes	Kank4	3.88089	4.32907	0.829158	0.731865
Vwa5b2	chr16:20589581-20605377	2.21136	0.424814	-2.38003	5e-05	0.000401447	yes	Vwa5b2	1.92602	2.35279	0.314715	0.507265
Sdr16c6	chr4:4056665-4077514	36.9539	7.1822	-2.36323	5e-05	0.000401447	yes	Sdr16c6	38.7354	32.7672	7.37478	6.52217
Adh7	chr3:138210716-138239663	1.41447	0.277078	-2.35189	0.0039	0.0190535	yes	Adh7	1.63815	1.09872	0.382145	0.153977
Hspa4l	chr3:40745612-40790365	16.09	3.17897	-2.33953	5e-05	0.000401447	yes	Hspa4l	15.4767	15.6561	3.5866	2.56443
Nfatc1	chr18:80606204-80713071	116.56	23.1741	-2.33049	5e-05	0.000401447	yes	Nfatc1	110.89	114.645	24.9725	19.8674
Sostdc1	chr12:36314168-36318452	240.471	47.9045	-2.32763	5e-05	0.000401447	yes	Sostdc1	236.2	229.09	47.3686	45.3227
Pou3f1	chr4:124657645-124660655	40.1297	8.03546	-2.32022	5e-05	0.000401447	yes	Pou3f1	36.4584	41.1891	8.81049	6.73745
Cyp2d22	chr15:82370526-82380260	7.44006	1.49514	-2.31504	5e-05	0.000401447	yes	Cyp2d22	7.36121	7.03468	1.47592	1.41704
Enpp1	chr10:24641410-24712102	9.87393	1.98578	-2.31392	5e-05	0.000401447	yes	Enpp1	7.43122	11.674	1.91412	1.92821
Krt28	chr11:99365006-99374903	3.77107	0.758908	-2.31298	0.0002	0.00141578	yes	Krt28	4.53915	2.75756	0.690002	0.77842
Ptger4	chr15:5233403-5243831	2.60039	0.525987	-2.30563	5e-05	0.000401447	yes	Ptger4	1.85462	3.17692	0.517394	0.500347
Tmprss4	chr9:45172725-45249985	9.43523	1.91896	-2.29773	5e-05	0.000401447	yes	Tmprss4	7.94374	10.3126	1.6096	2.10343
Mamld1	chrX:71050255-71154717	8.50318	1.73169	-2.29582	5e-05	0.000401447	yes	Mamld1	8.38072	8.07221	1.49636	1.85432
Rassf5	chr1:131176409-131245178	8.45094	1.73383	-2.28515	5e-05	0.000401447	yes	Rassf5	7.98543	8.36643	1.8073	1.54752
Lgals9	chr11:78962978-78984924	34.015	6.97948	-2.28498	5e-05	0.000401447	yes	Lgals9	32.6097	33.2065	6.74171	6.763
Rorc	chr3:94372825-94398239	8.23265	1.69178	-2.28281	5e-05	0.000401447	yes	Rorc	8.37645	7.55304	1.7603	1.51315
Scube2	chr7:109798690-109865679	2.53653	0.522928	-2.27817	5e-05	0.000401447	yes	Scube2	2.69713	2.21084	0.404028	0.607794
Tle2	chr10:81575286-81590845	5.69101	1.17556	-2.27534	5e-05	0.000401447	yes	Tle2	5.63723	5.37439	1.36985	0.904756
BC100530	chr16:36359381-36367570	448.039	92.8728	-2.2703	5e-05	0.000401447	yes	BC100530	397.111	469.808	87.8421	91.8589
Steap4	chr5:7960471-7982213	21.3721	4.46687	-2.25839	5e-05	0.000401447	yes	Steap4	21.8102	19.543	4.18221	4.46081
Ildr1	chr16:36694037-36726741	3.8334	0.807535	-2.24703	5e-05	0.000401447	yes	Ildr1	3.46969	3.94762	0.910376	0.652137
Krt71	chr15:101733948-101743097	1.3208	0.278387	-2.24625	0.00565	0.02601	yes	Krt71	1.64524	0.910401	0.318592	0.220063
Nrsn1	chr13:25252038-25269996	1.84939	0.390159	-2.24491	0.00185	0.0100478	yes	Nrsn1	1.07438	2.50403	0.231828	0.523097
Gpc6	chr14:116925314-117979529	1.9359	0.412328	-2.23114	5e-05	0.000401447	yes	Gpc6	1.69347	2.05234	0.348496	0.449324
Serpina3g	chr12:104214543-104241934	3.40568	0.726066	-2.22977	0.00025	0.00173352	yes	Serpina3g	3.92837	2.66133	0.689986	0.714891
Lpar3	chr3:146220960-146286214	19.1526	4.12174	-2.21621	5e-05	0.000401447	yes	Lpar3	19.1836	17.875	4.24103	3.73418
Car13	chr3:14641726-14663002	20.0091	4.30704	-2.21589	5e-05	0.000401447	yes	Car13	18.8274	19.8884	4.32799	4.00576
Fosb	chr7:19302695-19310045	106.753	23.032	-2.21257	5e-05	0.000401447	yes	Fosb	125.207	81.3518	22.2236	22.3414
Naprt1	chr15:75890963-75894481	4.29063	0.928243	-2.20862	5e-05	0.000401447	yes	Naprt1	4.91116	3.39086	1.11282	0.683249
Ltbr	chr6:125306570-125313870	17.3733	3.78658	-2.1979	5e-05	0.000401447	yes	Ltbr	17.1508	16.465	3.27381	4.05291
Chmp4c	chr3:10366972-10391005	3.74978	0.822119	-2.18939	5e-05	0.000401447	yes	Chmp4c	3.54449	3.71103	0.95618	0.634552
Plekhf1	chr7:38220653-38227994	2.41131	0.528832	-2.18893	0.0025	0.0130496	yes	Plekhf1	2.30783	2.35784	0.917613	0.105633
Xdh	chr17:73883907-73950182	1.71017	0.375635	-2.18674	5e-05	0.000401447	yes	Xdh	1.89991	1.40913	0.393234	0.333589
Prkcdbp	chr7:105480615-105482197	35.1538	7.72216	-2.1866	5e-05	0.000401447	yes	Prkcdbp	33.4582	34.5614	8.79463	6.1471
Ssfa2	chr2:79635424-79672964	178.452	39.3783	-2.18007	5e-05	0.000401447	yes	Ssfa2	170.675	174.616	39.6717	36.5221
Prkd1	chr12:50341231-50649223	2.47851	0.54713	-2.17952	5e-05	0.000401447	yes	Prkd1	2.51331	2.2824	0.405335	0.653316
Barx2	chr9:31846043-31913285	259.867	57.7125	-2.17082	5e-05	0.000401447	yes	Barx2	249.108	253.712	62.1135	49.5553
Anxa8	chr14:34051129-34102754	30.3622	6.74849	-2.16964	5e-05	0.000401447	yes	Anxa8	34.224	24.5243	5.09911	7.95865
Alad	chr4:62505983-62520063	27.4761	6.11462	-2.16784	5e-05	0.000401447	yes	Alad	27.4885	25.6754	5.92541	5.90587
Psapl1	chr5:36017180-36398139	14.3059	3.18552	-2.16702	5e-05	0.000401447	yes	Psapl1	16.1949	11.4859	3.37888	2.78483
Chst3	chr10:60181527-60219260	2.58573	0.576894	-2.1642	5e-05	0.000401447	yes	Chst3	2.39801	2.60517	0.446377	0.669864
Ptgfr	chr3:151798609-151837528	1.36355	0.305529	-2.15798	0.00015	0.00109224	yes	Ptgfr	1.2582	1.38014	0.452309	0.138864
Ahr	chr12:35497978-35534989	21.1892	4.7756	-2.14957	5e-05	0.000401447	yes	Ahr	21.3909	19.6085	3.67571	5.56469
Dixdc1	chr9:50662752-50727984	22.8004	5.14275	-2.14845	5e-05	0.000401447	yes	Dixdc1	22.5046	21.6122	5.53954	4.41124
Eya1	chr1:14168957-14310199	1.40132	0.317071	-2.14391	5e-05	0.000401447	yes	Eya1	1.40491	1.30653	0.285643	0.327863
Aebp1	chr11:5861865-5878256	7.81272	1.76792	-2.14377	5e-05	0.000401447	yes	Aebp1	6.83779	8.27917	2.1676	1.25319
Irak3	chr10:120141653-120201537	2.53486	0.575259	-2.13962	5e-05	0.000401447	yes	Irak3	2.78261	2.12214	0.587244	0.525834
Trpv6	chr6:41620618-41636405	15.8902	3.62067	-2.13381	5e-05	0.000401447	yes	Trpv6	14.1805	16.5657	3.37704	3.62866
Fzd1	chr5:4753838-4758216	27.9396	6.36923	-2.13312	5e-05	0.000401447	yes	Fzd1	26.527	27.5338	6.58189	5.74202
Foxc1	chr13:31806645-31810635	11.4036	2.60177	-2.13193	5e-05	0.000401447	yes	Foxc1	11.3353	10.7298	2.99049	2.04371
Acadl	chr1:66830838-66863309	35.5023	8.10847	-2.13041	5e-05	0.000401447	yes	Acadl	35.7813	32.9127	7.17796	8.51125
Hist1h2bc	chr13:23684198-23692480	20.0963	4.59212	-2.1297	5e-05	0.000401447	yes	Hist1h2bc	19.8979	18.9867	5.4981	3.38727
Crip1	chr12:113152011-113153879	29.6261	6.78931	-2.12553	5e-05	0.000401447	yes	Crip1	27.8359	29.4881	6.41773	6.71902
Hoxa1	chr6:52155366-52158317	5.66434	1.29901	-2.12449	5e-05	0.000401447	yes	Hoxa1	6.20503	4.75498	1.10904	1.40445
Lrig1	chr6:94500313-94700145	246.697	56.5918	-2.12408	5e-05	0.000401447	yes	Lrig1	246.284	231.055	52.1015	57.3989
Ptgs1	chr2:36230425-36252269	1.32282	0.305605	-2.11387	0.0015	0.00840496	yes	Ptgs1	1.50817	1.05136	0.372815	0.218505
Crabp2	chr3:87948692-87953372	7.51302	1.76311	-2.09127	5e-05	0.000401447	yes	Crabp2	7.11933	7.41774	1.61253	1.79894
Upk3bl	chr5:136057266-136064324	6.55022	1.54277	-2.08602	0.0002	0.00141578	yes	Upk3bl	7.69829	4.97583	1.14307	1.84206
Fmn1	chr2:113220186-113716767	1.76158	0.418648	-2.07306	5e-05	0.000401447	yes	Fmn1	1.57422	1.8343	0.290744	0.519304
Ucp2	chr7:100493344-100502173	229.938	54.6513	-2.07292	5e-05	0.000401447	yes	Ucp2	233.6	211.31	57.3103	48.4354
Smoc1	chr12:81026807-81186414	2.36417	0.56727	-2.05923	5e-05	0.000401447	yes	Smoc1	2.24187	2.33259	0.471601	0.626018
Hoxa5	chr6:52169061-52213597	21.4303	5.2042	-2.0419	5e-05	0.000401447	yes	Hoxa5	22.515	18.9509	4.21806	5.85162
Rtn4rl1	chr11:75193992-75267762	2.30984	0.564255	-2.03338	5e-05	0.000401447	yes	Rtn4rl1	2.05113	2.41822	0.669521	0.422264
Chchd10	chr10:75935572-75937734	7.65195	1.87289	-2.03056	0.0001	0.000758012	yes	Chchd10	8.30306	6.50281	1.74704	1.87685
Spock1	chr13:57421194-57908332	2.80434	0.687111	-2.02905	5e-05	0.000401447	yes	Spock1	2.59476	2.83141	0.772516	0.556987
Fam163b	chr2:27110378-27142477	3.55399	0.875616	-2.02107	5e-05	0.000401447	yes	Fam163b	3.3545	3.52218	1.21708	0.477159
Rin3	chr12:102283073-102390854	1.74361	0.429665	-2.02079	5e-05	0.000401447	yes	Rin3	1.22989	2.14385	0.420443	0.410923
Trpv4	chr5:114622153-114658421	18.5298	4.57395	-2.01833	5e-05	0.000401447	yes	Trpv4	17.8455	18.0081	5.14083	3.70937
Tgm5	chr2:121046110-121085759	16.934	4.19181	-2.01428	5e-05	0.000401447	yes	Tgm5	15.9817	16.7842	3.74959	4.36121
Hist1h1c	chr13:23738806-23740367	30.196	7.47483	-2.01425	5e-05	0.000401447	yes	Hist1h1c	30.5655	27.8614	7.39586	7.06731
Acpp	chr9:104288239-104337722	13.36	3.32084	-2.0083	5e-05	0.000401447	yes	Acpp	12.8836	12.9668	3.17552	3.25004
Gas1	chr13:60174404-60177535	141.806	35.345	-2.00434	5e-05	0.000401447	yes	Gas1	139.636	134.746	35.379	33.0106
Trabd2b	chr4:114406723-114615098	3.16364	0.79169	-1.99858	5e-05	0.000401447	yes	Trabd2b	2.88149	3.23989	0.822914	0.708939
Klrg2	chr6:38626659-38637239	15.6856	3.9287	-1.99732	5e-05	0.000401447	yes	Klrg2	16.1355	14.2148	2.93726	4.66444
4930556M19Rik	chr15:10714835-10790123	2.22508	0.558574	-1.99404	0.00105	0.00619942	yes	4930556M19Rik	2.41104	1.8943	0.836412	0.244382
Pon3	chr6:5220851-5256233	4.7583	1.19483	-1.99364	0.0001	0.000758012	yes	Pon3	4.91784	4.28907	1.12908	1.18281
Pdgfb	chr15:79995875-80014808	20.8548	5.23902	-1.99301	5e-05	0.000401447	yes	Pdgfb	19.8811	20.4712	5.04005	5.09702
Dock5	chr14:67751927-67933572	1.5902	0.400485	-1.98938	5e-05	0.000401447	yes	Dock5	1.44448	1.63242	0.441143	0.333762
Ank	chr15:27466676-27594907	106.713	27.0473	-1.98018	5e-05	0.000401447	yes	Ank	104.366	102.115	28.0727	24.2617
C1qtnf1	chr11:118428456-118454995	2.20452	0.559246	-1.97891	5e-05	0.000401447	yes	C1qtnf1	1.61903	2.64653	0.618933	0.463161
Rgma	chr7:73313805-73419899	90.1939	22.9207	-1.97638	5e-05	0.000401447	yes	Rgma	88.2825	86.2351	24.045	20.3046
Il34	chr8:110741828-110805903	4.06869	1.03627	-1.97316	5e-05	0.000401447	yes	Il34	4.05404	3.81854	1.0579	0.947203
5430435G22Rik	chr1:131688694-131713464	22.6378	5.80093	-1.96438	5e-05	0.000401447	yes	5430435G22Rik	20.1706	23.6317	5.97313	5.25117
2900041M22Rik	chr11:117611246-117613417	1.78422	0.458242	-1.96111	0.0117	0.0479311	yes	2900041M22Rik	1.36348	2.08883	0.38731	0.49935
A930004D18Rik	chr2:18025188-18037741	2.35417	0.605357	-1.95936	0.00065	0.00404312	yes	A930004D18Rik	2.18983	2.36529	0.448475	0.722841
Fzd7	chr1:59482146-59486955	112.576	28.9563	-1.95895	5e-05	0.000401447	yes	Fzd7	106.449	111.376	29.345	26.683
Arc	chr15:74669080-74672570	33.3335	8.57796	-1.95827	5e-05	0.000401447	yes	Arc	15.9177	48.5798	8.18829	8.40934
Slc2a9	chr5:38349272-38502152	4.02395	1.04038	-1.95151	5e-05	0.000401447	yes	Slc2a9	3.66337	4.12263	1.01157	1.00147
Aldh1l2	chr10:83487446-83534140	3.19031	0.825613	-1.95016	5e-05	0.000401447	yes	Aldh1l2	2.74992	3.42307	0.842798	0.754693
Haao	chr17:83831353-83846790	3.06786	0.794637	-1.94887	0.00265	0.0137036	yes	Haao	3.35398	2.58208	1.12075	0.416807
Iffo2	chr4:139530547-139620382	32.835	8.55052	-1.94115	5e-05	0.000401447	yes	Iffo2	31.3317	32.2012	8.62411	7.92043
Ttpa	chr4:20008427-20030785	1.82574	0.479387	-1.92921	0.00025	0.00173352	yes	Ttpa	1.82078	1.71186	0.570184	0.357391
Golim4	chr3:75876383-75956831	61.8928	16.2904	-1.92575	5e-05	0.000401447	yes	Golim4	59.3307	60.4268	15.4856	16.035
Sh3kbp1	chrX:159627407-159975917	4.64684	1.22521	-1.92322	5e-05	0.000401447	yes	Sh3kbp1	4.47617	4.51507	1.14278	1.2279
Snx7	chr3:117781496-117868936	10.4755	2.76211	-1.92318	5e-05	0.000401447	yes	Snx7	10.5842	9.68502	2.25897	3.08549
S100a14	chr3:90526848-90528835	393.079	103.815	-1.9208	5e-05	0.000401447	yes	S100a14	409.939	350.636	91.4421	109.431
Kirrel3	chr9:34488730-35036307	1.3259	0.350734	-1.91853	0.00015	0.00109224	yes	Kirrel3	1.12907	1.43645	0.284625	0.394017
Neat1	chr19:5842301-5845478	51.9635	13.7481	-1.91826	5e-05	0.000401447	yes	Neat1	53.7301	46.8149	13.3343	13.2672
Cryab	chr9:50752757-50756633	3.43531	0.909778	-1.91685	0.00145	0.00815851	yes	Cryab	2.98424	3.66279	0.894969	0.865375
Tox3	chr8:90247111-90348252	18.5012	4.91804	-1.91146	5e-05	0.000401447	yes	Tox3	19.0761	16.7222	4.74359	4.77241
Rapgefl1	chr11:98836784-98853005	69.6321	18.5479	-1.9085	5e-05	0.000401447	yes	Rapgefl1	70.0174	64.7149	17.4419	18.4468
Mfsd9	chr1:40772039-40790657	7.96157	2.12242	-1.90734	5e-05	0.000401447	yes	Mfsd9	7.49647	7.90849	2.08272	2.02399
Adamts9	chr6:92772698-92901441	14.2893	3.81526	-1.90508	5e-05	0.000401447	yes	Adamts9	12.7524	14.8962	4.24087	3.14134
Tlx3	chr11:33200751-33203588	2.95887	0.790765	-1.90373	0.0011	0.00645094	yes	Tlx3	2.78675	2.93842	0.668351	0.861713
Thsd1	chr8:22227302-22261332	2.29583	0.616212	-1.89752	5e-05	0.000401447	yes	Thsd1	1.8106	2.63165	0.708109	0.484209
Cdkn2c	chr4:109660875-109665372	19.4151	5.21352	-1.89685	5e-05	0.000401447	yes	Cdkn2c	21.0177	16.5489	4.46124	5.62649
Nexn	chr3:152236983-152266320	2.71092	0.728097	-1.89658	0.0001	0.000758012	yes	Nexn	2.15583	3.08958	0.609994	0.798814
Slc7a8	chr14:54722214-54781886	3.21257	0.86402	-1.89459	5e-05	0.000401447	yes	Slc7a8	3.11414	3.1019	0.756867	0.914939
Pde1b	chr15:103503297-103530052	1.91809	0.517124	-1.89109	0.00015	0.00109224	yes	Pde1b	2.03734	1.67399	0.524799	0.475792
Prlr	chr15:10177237-10349180	3.57972	0.970818	-1.88257	0.0033	0.0165054	yes	Prlr	3.68637	3.24008	0.592002	1.28645
Mal2	chr15:54571365-54602846	12.9575	3.52259	-1.87908	5e-05	0.000401447	yes	Mal2	14.1655	10.9062	3.5397	3.27622
Niacr1	chr5:123863569-123865516	10.0787	2.74448	-1.8767	5e-05	0.000401447	yes	Niacr1	8.98599	10.5154	3.07799	2.23235
Osmr	chr15:6813576-6874313	7.8805	2.14661	-1.87623	5e-05	0.000401447	yes	Osmr	7.61446	7.63364	2.195	1.9585
Parvg	chr15:84324719-84342978	2.66939	0.727863	-1.87477	0.00015	0.00109224	yes	Parvg	2.99661	2.16843	0.69793	0.710425
Gpr135	chr12:72069617-72070991	2.06855	0.570483	-1.85836	0.0089	0.0382315	yes	Gpr135	1.88969	2.11277	0.982087	0.121749
Hoxa3	chr6:52169061-52213597	11.1987	3.09054	-1.85741	5e-05	0.000401447	yes	Hoxa3	11.5872	10.0814	2.38457	3.59536
Stfa3	chr16:36450536-36455392	416.288	115.064	-1.85514	5e-05	0.000401447	yes	Stfa3	386.434	419.047	106.039	116.601
Npr2	chr4:43631934-43651240	3.26337	0.902498	-1.85437	5e-05	0.000401447	yes	Npr2	2.74611	3.56824	0.943583	0.802675
Scnn1g	chr7:121734506-121768477	5.77347	1.60448	-1.84733	5e-05	0.000401447	yes	Scnn1g	5.48229	5.6889	1.20884	1.8957
Ube2ql1	chr13:69702831-69739897	2.39708	0.666835	-1.84588	0.0001	0.000758012	yes	Ube2ql1	2.4929	2.14524	0.763133	0.527135
Fam167a	chr14:63436393-63465502	4.7365	1.31794	-1.84554	5e-05	0.000401447	yes	Fam167a	3.91958	5.24516	1.28165	1.26845
Mst1	chr9:108080435-108085027	1.86386	0.51877	-1.84513	0.001	0.00594158	yes	Mst1	1.83831	1.76812	0.517364	0.486412
Nkain2	chr10:31689318-32889915	1.04199	0.290395	-1.84325	0.00365	0.0179688	yes	Nkain2	0.781242	1.23492	0.270853	0.291036
Fam13c	chr10:70440667-70599291	2.04342	0.570525	-1.84063	0.00225	0.0119283	yes	Fam13c	1.86381	2.09004	0.440952	0.662966
Slco4a1	chr2:180460977-180474853	10.8471	3.03165	-1.83913	5e-05	0.000401447	yes	Slco4a1	11.4035	9.58469	3.1924	2.6736
Igfbp2	chr1:72824479-72852471	19.1449	5.35354	-1.8384	5e-05	0.000401447	yes	Igfbp2	19.1484	17.8954	3.77241	6.58623
Pcsk2	chr2:143535475-143816282	1.65233	0.462766	-1.83615	5e-05	0.000401447	yes	Pcsk2	1.57571	1.62142	0.379844	0.515569
Nav1	chr1:135434579-135585355	6.25076	1.75138	-1.83554	5e-05	0.000401447	yes	Nav1	6.30758	5.78712	1.62031	1.76847
Cxxc4	chr3:134236494-134262089	1.30319	0.365386	-1.83456	5e-05	0.000401447	yes	Cxxc4	1.26083	1.26074	0.436432	0.270559
Fbln2	chr6:91212763-91272540	98.2839	27.5616	-1.8343	5e-05	0.000401447	yes	Fbln2	95.2713	94.8998	26.6673	26.6621
Pxdc1	chr13:34627840-34652681	11.2191	3.14643	-1.83417	5e-05	0.000401447	yes	Pxdc1	9.87597	11.832	2.46327	3.6248
Gjb3	chr4:127325234-127330836	51.3697	14.4408	-1.83077	5e-05	0.000401447	yes	Gjb3	56.7656	42.6305	15.0957	12.8461
Sdpr	chr1:51218385-51333779	5.93979	1.68007	-1.82189	5e-05	0.000401447	yes	Sdpr	5.66401	5.82898	1.10792	2.14286
Kcnv1	chr15:45106283-45114934	1.33857	0.379282	-1.81935	0.00025	0.00173352	yes	Kcnv1	1.21482	1.37521	0.359228	0.374651
Spon2	chr5:33213517-33218238	1.92955	0.548729	-1.8141	0.00135	0.00767726	yes	Spon2	1.3499	2.38361	0.706105	0.355639
Rem2	chr14:54476099-54480434	1.98909	0.567078	-1.81049	0.0028	0.0143516	yes	Rem2	1.67269	2.17604	0.583921	0.513328
Aox4	chr1:58210396-58268596	4.64892	1.32869	-1.8069	5e-05	0.000401447	yes	Aox4	4.81996	4.17531	1.46609	1.10481
6430571L13Rik	chr9:107340639-107349683	6.15185	1.7617	-1.80405	5e-05	0.000401447	yes	6430571L13Rik	6.0382	5.86511	1.49432	1.91442
Ldlrad4	chr18:67933256-68255549	7.3893	2.1278	-1.79608	5e-05	0.000401447	yes	Ldlrad4	6.55508	7.74259	1.96428	2.15282
Epdr1	chr13:19591707-19619830	2.84837	0.820287	-1.79593	0.0001	0.000758012	yes	Epdr1	2.67054	2.84081	0.658511	0.928676
Olfml2b	chr1:170644531-170682789	2.11835	0.610732	-1.79433	0.00015	0.00109224	yes	Olfml2b	1.50526	2.59357	0.124893	1.05682
Slc41a3	chr6:90604879-90646412	1.13191	0.32636	-1.79422	0.00655	0.0294968	yes	Slc41a3	1.05341	1.13673	0.349683	0.281796
4933431E20Rik	chr3:107877229-107898685	4.71678	1.36449	-1.78944	5e-05	0.000401447	yes	4933431E20Rik	4.82515	4.30143	1.20481	1.43535
Sox7	chr14:63943705-63950732	7.86128	2.27661	-1.78787	5e-05	0.000401447	yes	Sox7	8.12398	7.08693	2.36028	2.04478
Fos	chr12:85473900-85477270	792.596	229.609	-1.78741	5e-05	0.000401447	yes	Fos	807.098	726.509	239.546	204.728
Lpar5	chr6:125067919-125082472	2.68332	0.779608	-1.7832	0.00125	0.00717207	yes	Lpar5	2.96312	2.22887	0.669403	0.839073
Sytl2	chr7:90348698-90410439	1.66658	0.485036	-1.78073	0.00015	0.00109224	yes	Sytl2	1.23998	1.98472	0.384775	0.553729
Cxcr4	chr1:128588198-128592299	54.7913	16.0026	-1.77564	5e-05	0.000401447	yes	Cxcr4	51.9335	54.0831	12.4715	18.4921
Piezo2	chr18:63010212-63387183	1.95145	0.571543	-1.77161	5e-05	0.000401447	yes	Piezo2	1.98641	1.78949	0.476924	0.628963
Il20rb	chr9:100457718-100486473	17.0547	4.99621	-1.77126	5e-05	0.000401447	yes	Il20rb	16.8603	16.1391	4.82389	4.84335
Ppp2r3a	chr9:101104988-101251832	21.8288	6.39946	-1.77021	5e-05	0.000401447	yes	Ppp2r3a	19.8417	22.3951	5.85682	6.52559
Msrb3	chr10:120781100-120898971	9.23698	2.71161	-1.76827	5e-05	0.000401447	yes	Msrb3	8.33311	9.53968	2.58263	2.66411
Sh3d21	chr4:126150601-126163341	10.9204	3.2085	-1.76705	5e-05	0.000401447	yes	Sh3d21	10.5477	10.5823	2.85476	3.35343
Klf2	chr8:72319061-72321654	2.61235	0.767806	-1.76654	0.0013	0.00742405	yes	Klf2	3.28361	1.77108	1.21796	0.267677
Fzd5	chr1:64730557-64737750	6.68925	1.96826	-1.76492	5e-05	0.000401447	yes	Fzd5	5.78465	7.15848	1.97205	1.83637
Thbs1	chr2:118111921-118127133	53.86	15.8545	-1.76432	5e-05	0.000401447	yes	Thbs1	43.8343	60.3802	15.6537	15.0235
Plxna2	chr1:194619828-194816868	11.7366	3.46848	-1.75864	5e-05	0.000401447	yes	Plxna2	10.7183	11.9911	3.34406	3.36715
Apoc1	chr7:19689480-19692658	71.6529	21.2073	-1.75646	5e-05	0.000401447	yes	Apoc1	82.9237	55.7187	18.5987	22.4357
Arid5a	chr1:36307732-36324029	4.39792	1.30183	-1.75628	5e-05	0.000401447	yes	Arid5a	3.70403	4.80558	1.25342	1.26551
Csta	chr16:36119945-36131189	1.17462	0.348082	-1.75469	0.0052	0.0243238	yes	Csta	1.02442	1.24837	0.21388	0.45963
Cyp17a1	chr19:46667164-46673000	1.33695	0.396252	-1.75445	0.00995	0.0419157	yes	Cyp17a1	1.76901	0.817864	0.327227	0.439489
Msn	chrX:96096044-96168553	107.476	31.968	-1.74931	5e-05	0.000401447	yes	Msn	103.89	104.066	30.5517	31.3037
Rhbdf2	chr11:116598165-116627019	21.3616	6.35669	-1.74868	5e-05	0.000401447	yes	Rhbdf2	16.8748	24.4581	6.36483	5.93482
Gm3893	chr4:41889794-42462993	9.52535	2.84406	-1.74382	5e-05	0.000401447	yes	Gm3893	10.1881	8.24263	2.45688	3.04613
Mdga1	chr17:29827957-29887882	2.66107	0.794696	-1.74353	5e-05	0.000401447	yes	Mdga1	3.00552	2.14343	0.680334	0.857335
Fah	chr7:84585158-84605942	12.7062	3.80468	-1.73968	5e-05	0.000401447	yes	Fah	13.654	10.9314	3.7321	3.62964
Egr2	chr10:67537868-67542188	124.581	37.3262	-1.73882	5e-05	0.000401447	yes	Egr2	98.4388	142.615	32.8346	39.3885
Ifi27l1	chr12:103434188-103440245	9.00181	2.69872	-1.73794	5e-05	0.000401447	yes	Ifi27l1	8.66963	8.74811	2.57247	2.64933
Itgb6	chr2:60598291-60722603	3.80683	1.14223	-1.73674	5e-05	0.000401447	yes	Itgb6	3.57971	3.78618	1.02946	1.18065
Deptor	chr15:55099916-55254202	3.16644	0.953539	-1.7315	5e-05	0.000401447	yes	Deptor	2.95612	3.17068	0.747215	1.0978
Atp6v1b1	chr6:83743016-83758810	72.4318	21.9112	-1.72495	5e-05	0.000401447	yes	Atp6v1b1	70.586	69.5634	23.9171	18.4792
BC117090	chr16:36321664-36334332	26.1957	7.96094	-1.71832	5e-05	0.000401447	yes	BC117090	24.6992	25.9873	6.90298	8.50077
Dll1	chr17:15367353-15375823	12.6541	3.84594	-1.71819	5e-05	0.000401447	yes	Dll1	11.8548	12.6298	3.64522	3.79636
Tpm2	chr4:43514711-43523388	10.1084	3.07257	-1.71803	5e-05	0.000401447	yes	Tpm2	9.29412	10.2647	2.74337	3.20179
Hid1	chr11:115347708-115367719	1.62465	0.494347	-1.71653	0.00055	0.00349958	yes	Hid1	1.32534	1.81822	0.476506	0.480014
Copz2	chr11:96849875-96861202	22.7622	6.93998	-1.71363	5e-05	0.000401447	yes	Copz2	21.4364	22.6065	8.23535	5.19292
4921531C22Rik	chr2:179976852-179979013	1.25149	0.381707	-1.71311	0.0109	0.045154	yes	4921531C22Rik	1.26592	1.1556	0.315214	0.423357
Fam212b	chr3:105704598-105720842	7.64891	2.33685	-1.71069	5e-05	0.000401447	yes	Fam212b	7.44628	7.35372	2.60283	1.91878
Mall	chr2:127704389-127729897	14.7145	4.50617	-1.70727	5e-05	0.000401447	yes	Mall	14.6228	13.8486	4.05852	4.66055
Jdp2	chr12:85599104-85639878	1.88222	0.577674	-1.70411	0.0054	0.0250863	yes	Jdp2	1.54689	2.09504	0.58977	0.527979
Rnf39	chr17:36943050-36947986	10.119	3.10862	-1.70272	5e-05	0.000401447	yes	Rnf39	9.24974	10.3298	2.56717	3.44776
Galnt18	chr7:111471660-111779977	18.021	5.54856	-1.69949	5e-05	0.000401447	yes	Galnt18	17.5551	17.314	5.04746	5.68854
Fam69c	chr18:84720241-84740436	1.76611	0.544186	-1.69841	0.00215	0.0114579	yes	Fam69c	1.57732	1.83996	0.459931	0.593023
Slc29a1	chr17:45585199-45599603	20.584	6.35149	-1.69636	5e-05	0.000401447	yes	Slc29a1	20.2201	19.6082	7.01067	5.27893
Fhod3	chr18:24709444-25168877	10.2042	3.15286	-1.69443	5e-05	0.000401447	yes	Fhod3	9.71136	10.0328	3.45598	2.64454
Fmo2	chr1:162875046-162898712	2.54274	0.786287	-1.69326	5e-05	0.000401447	yes	Fmo2	2.40755	2.51243	1.00985	0.511549
Itga6	chr2:71787082-71856758	94.4331	29.2646	-1.69014	5e-05	0.000401447	yes	Itga6	89.2856	93.4344	24.5319	32.0926
Mgll	chr6:88724411-88828360	5.70863	1.77343	-1.6866	5e-05	0.000401447	yes	Mgll	5.82813	5.21759	2.08725	1.34418
Col14a1	chr15:55307749-55520803	90.2554	28.1863	-1.67902	5e-05	0.000401447	yes	Col14a1	89.1868	85.4497	27.3908	27.1472
Fgfbp1	chr5:43978857-43981799	107.549	33.5955	-1.67865	5e-05	0.000401447	yes	Fgfbp1	111.818	96.2792	28.5449	36.4596
Cbr3	chr16:93683218-93690991	26.1881	8.18283	-1.67824	5e-05	0.000401447	yes	Cbr3	21.9382	28.7337	8.19893	7.63416
Dsg3	chr18:20510303-20541310	37.2371	11.6387	-1.67781	5e-05	0.000401447	yes	Dsg3	34.9907	37.06	10.6992	11.8208
Slc27a6	chr18:58556239-58612869	1.2458	0.389712	-1.6766	0.00425	0.0204684	yes	Slc27a6	0.906064	1.50446	0.451111	0.302949
Pthlh	chr6:147252109-147264085	137.632	43.1421	-1.67365	5e-05	0.000401447	yes	Pthlh	133.481	132.826	40.6272	42.8492
Loxl1	chr9:58287722-58313212	1.69676	0.532453	-1.67206	0.00045	0.00294151	yes	Loxl1	1.17628	2.10681	0.519024	0.511227
Sdc3	chr4:130792536-130826318	14.4054	4.55866	-1.65993	5e-05	0.000401447	yes	Sdc3	13.1357	14.7375	4.49346	4.32717
Gsn	chr2:35256358-35307902	168.561	53.5938	-1.65313	5e-05	0.000401447	yes	Gsn	162.448	163.703	52.5704	51.1291
Mgst2	chr3:51661192-51682675	15.9248	5.06393	-1.65294	0.00015	0.00109224	yes	Mgst2	14.8575	15.9557	6.00044	3.79785
Fgf13	chrX:59062149-59134436	1.96477	0.626988	-1.64785	0.00115	0.00667996	yes	Fgf13	1.60167	2.2	0.706839	0.506329
Arhgap28	chr17:67842707-68004108	6.96968	2.2299	-1.64411	5e-05	0.000401447	yes	Arhgap28	5.85067	7.63508	2.45265	1.86203
Tmem40	chr6:115729136-115762466	16.4603	5.28079	-1.64016	5e-05	0.000401447	yes	Tmem40	14.7791	17.0701	4.59371	5.62418
Pfkp	chr13:6548156-6648724	8.43814	2.70774	-1.63984	0.00285	0.0145651	yes	Pfkp	8.72685	7.60024	2.73018	2.50906
Boc	chr16:44485044-44558870	53.0838	17.0635	-1.63736	5e-05	0.000401447	yes	Boc	49.6654	53.0472	16.1653	16.8512
Cwh43	chr5:73406077-73453425	34.1035	10.969	-1.63648	5e-05	0.000401447	yes	Cwh43	41.5985	24.3889	10.231	10.9932
Lmna	chr3:88481148-88503332	308.263	99.4424	-1.63223	5e-05	0.000401447	yes	Lmna	299.346	297.118	100.413	92.0001
1600029D21Rik	chr9:50488798-50505639	12.1179	3.92266	-1.62723	5e-05	0.000401447	yes	1600029D21Rik	12.9007	10.5464	3.20818	4.38184
Skap2	chr6:51859164-52012549	67.9192	22.1173	-1.61865	5e-05	0.000401447	yes	Skap2	68.5918	62.8262	17.9164	24.8786
Cd36	chr5:17781689-17888959	1.61396	0.526227	-1.61685	0.00015	0.00109224	yes	Cd36	1.62511	1.49777	0.334222	0.683983
Cpxm2	chr7:132042809-132154741	1.60593	0.525355	-1.61204	0.00055	0.00349958	yes	Cpxm2	1.59966	1.50768	0.575111	0.441407
Egr3	chr14:70077444-70080157	106.155	34.7518	-1.61101	5e-05	0.000401447	yes	Egr3	85.7099	119.691	33.5872	33.6546
Leprel1	chr16:25960322-26105784	8.94979	2.93603	-1.60799	5e-05	0.000401447	yes	Leprel1	8.66708	8.65001	3.20462	2.47635
Il17rb	chr14:29996167-30008896	14.2512	4.69717	-1.60122	5e-05	0.000401447	yes	Il17rb	13.5421	14.0327	4.58098	4.50764
Cbs	chr17:31612622-31637205	21.8381	7.2115	-1.59847	5e-05	0.000401447	yes	Cbs	19.5954	22.6594	7.83009	6.12357
Cebpb	chr2:167688914-167690418	105.87	34.9987	-1.59692	5e-05	0.000401447	yes	Cebpb	106.206	98.6433	38.1401	29.5794
Fam161a	chr11:23013386-23023741	1.74656	0.577771	-1.59594	0.00445	0.0212722	yes	Fam161a	1.62563	1.75381	0.619065	0.498872
1810011O10Rik	chr8:24437615-24438946	26.032	8.61436	-1.59547	5e-05	0.000401447	yes	1810011O10Rik	26.1212	24.2486	7.83231	8.83576
Eif2c4	chr4:126489542-126533458	6.09778	2.01843	-1.59505	5e-05	0.000401447	yes	Eif2c4	5.59618	6.20251	2.00193	1.90357
Socs3	chr11:117966086-117969366	29.4106	9.74663	-1.59336	5e-05	0.000401447	yes	Socs3	29.6899	27.2171	9.0075	9.85142
Aff1	chr5:103754161-103855322	9.51945	3.16261	-1.58976	5e-05	0.000401447	yes	Aff1	8.35732	10.062	3.24327	2.87611
Ppargc1b	chr18:61298135-61400431	3.94204	1.31048	-1.58885	5e-05	0.000401447	yes	Ppargc1b	3.71819	3.90932	1.31053	1.22514
Aim1	chr10:43950306-44004846	45.1266	15.0056	-1.58848	5e-05	0.000401447	yes	Aim1	42.8535	44.4628	14.8097	14.2248
Il6ra	chr3:89869323-89913162	3.39227	1.12852	-1.58781	5e-05	0.000401447	yes	Il6ra	3.33647	3.22729	1.20915	0.974445
Zc3hav1	chr6:38310496-38354603	8.86315	2.9488	-1.58769	5e-05	0.000401447	yes	Zc3hav1	8.8993	8.25014	3.03188	2.67381
Ccnb1ip1	chr14:50789248-50795728	2.73498	0.910332	-1.58707	0.00245	0.0128325	yes	Ccnb1ip1	3.59274	1.69923	0.884345	0.877071
Sirpa	chr2:129592838-129632228	22.2055	7.39794	-1.58572	5e-05	0.000401447	yes	Sirpa	21.2085	21.7574	7.99276	6.32163
Cyyr1	chr16:85456243-85550373	2.32954	0.776847	-1.58434	0.0013	0.00742405	yes	Cyyr1	1.76816	2.73931	0.635911	0.867224
Lpcat2	chr8:92855349-92919279	10.6682	3.56203	-1.58254	5e-05	0.000401447	yes	Lpcat2	10.3948	10.2472	3.3673	3.52493
Ntn4	chr10:93641048-93745972	8.97918	3.00402	-1.57969	5e-05	0.000401447	yes	Ntn4	8.98303	8.39092	2.72809	3.08444
Sertad1	chr7:27486952-27490314	34.1965	11.4522	-1.57823	5e-05	0.000401447	yes	Sertad1	31.1604	35.007	8.20965	13.9493
S1pr5	chr9:21242916-21248443	1.89112	0.634595	-1.57534	0.00225	0.0119283	yes	S1pr5	1.89207	1.7671	0.78504	0.442848
Phyh	chr2:4918995-4938743	16.1675	5.43119	-1.57375	5e-05	0.000401447	yes	Phyh	14.5489	16.7339	4.88522	5.62368
Foxo1	chr3:52268336-52350109	22.3342	7.50528	-1.57328	5e-05	0.000401447	yes	Foxo1	22.2007	21.0141	7.86701	6.65507
Col23a1	chr11:51289919-51583925	1.03237	0.346987	-1.57301	0.0005	0.00322686	yes	Col23a1	0.864242	1.13331	0.349493	0.321898
Tmem63a	chr1:180942517-180975104	15.6314	5.26237	-1.57066	5e-05	0.000401447	yes	Tmem63a	14.8452	15.4002	5.62507	4.55717
Steap3	chr1:120226415-120271082	1.59939	0.538548	-1.57038	0.00185	0.0100478	yes	Steap3	1.08042	2.01427	0.52975	0.512295
Ntf3	chr6:126101411-126166744	7.18785	2.42291	-1.56882	5e-05	0.000401447	yes	Ntf3	7.40381	6.50407	1.7056	2.98253
Rasa4	chr5:136083915-136111860	1.02672	0.347319	-1.56371	0.0047	0.0223012	yes	Rasa4	1.01953	0.967096	0.333256	0.338778
Tmem26	chr10:68723745-68782654	2.06099	0.697604	-1.56286	0.0001	0.000758012	yes	Tmem26	1.96245	2.0254	0.655501	0.694303
Sntb1	chr15:55639153-55906949	22.7895	7.72152	-1.56141	5e-05	0.000401447	yes	Sntb1	22.3382	21.7576	7.08294	7.85755
Palmd	chr3:116918261-116984406	30.0797	10.2095	-1.55888	5e-05	0.000401447	yes	Palmd	28.9797	29.2221	9.10819	10.6463
Tgfb3	chr12:86056742-86079041	172.256	58.5128	-1.55773	5e-05	0.000401447	yes	Tgfb3	166.784	166.517	62.1988	51.0185
Fmo1	chr1:162829560-162866548	2.85489	0.971021	-1.55586	0.0002	0.00141578	yes	Fmo1	2.94188	2.58209	0.719387	1.15946
Antxr2	chr5:97884687-98030962	2.22993	0.762872	-1.54749	5e-05	0.000401447	yes	Antxr2	2.27126	2.04348	0.612406	0.863688
Oplah	chr15:76294433-76307245	18.8262	6.45217	-1.54488	5e-05	0.000401447	yes	Oplah	18.7311	17.696	6.20479	6.27962
Fat2	chr11:55250609-55312257	26.6129	9.12908	-1.54359	5e-05	0.000401447	yes	Fat2	25.1064	26.3874	8.55443	9.10958
Elovl6	chr3:129532385-129638493	21.683	7.45348	-1.54058	5e-05	0.000401447	yes	Elovl6	22.5713	19.3834	8.19777	6.22408
Mrc2	chr11:105292645-105351145	12.0435	4.14124	-1.54012	5e-05	0.000401447	yes	Mrc2	11.0396	12.2636	4.53128	3.48167
Arhgap18	chr10:26772511-26918648	10.563	3.63745	-1.53803	5e-05	0.000401447	yes	Arhgap18	9.6366	10.802	3.23473	3.80343
Epas1	chr17:86753863-86833410	1.20623	0.41705	-1.53222	0.00035	0.00234563	yes	Epas1	1.30906	1.0249	0.494091	0.312866
Palm2	chr4:57568247-57717128	1.44401	0.499338	-1.53199	5e-05	0.000401447	yes	Palm2	1.33225	1.46178	0.433245	0.532932
Jak3	chr8:71676382-71690577	2.75304	0.953451	-1.5298	5e-05	0.000401447	yes	Jak3	2.50265	2.82425	0.963483	0.881364
Klk7	chr7:43811443-43816359	1.7298	0.599645	-1.52842	0.00725	0.0321625	yes	Klk7	1.55454	1.79247	0.694132	0.466131
Uap1l1	chr2:25361491-25365626	2.9586	1.03257	-1.51868	0.00145	0.00815851	yes	Uap1l1	2.61	3.11463	0.838963	1.15897
Arpc1b	chr5:145114255-145128186	55.8122	19.4813	-1.51849	5e-05	0.000401447	yes	Arpc1b	54.2406	53.7512	19.3149	18.3798
Nfil3	chr13:52967208-52981039	12.1902	4.26058	-1.5166	5e-05	0.000401447	yes	Nfil3	10.5276	13.0594	4.45344	3.79042
Epb4.1l1	chr2:156421051-156543214	7.26396	2.54664	-1.51216	5e-05	0.000401447	yes	Epb4.1l1	6.826	7.22916	2.14137	2.78617
Gja4	chr4:127311419-127314039	1.67021	0.586677	-1.50939	0.0119	0.0485386	yes	Gja4	1.67033	1.56139	0.360499	0.774671
Trnp1	chr4:133491099-133498550	2.46153	0.865316	-1.50826	0.0028	0.0143516	yes	Trnp1	2.61603	2.14682	0.981944	0.69237
Lynx1	chr15:74747855-74752979	1.40183	0.493365	-1.50659	0.0007	0.00433205	yes	Lynx1	1.47872	1.23371	0.604095	0.350524
Ctsc	chr7:88278092-88310875	22.5013	7.93727	-1.5033	5e-05	0.000401447	yes	Ctsc	22.1223	21.4159	7.69069	7.66726
Gpr125	chr5:49959950-50058996	145.512	51.4177	-1.5008	5e-05	0.000401447	yes	Gpr125	139.281	142.272	50.8552	48.6338
Man2a2	chr7:80349096-80371375	42.17	14.9091	-1.50002	5e-05	0.000401447	yes	Man2a2	40.8845	40.711	14.414	14.434
Mmp2	chr8:92827327-92853420	59.6527	21.1226	-1.4978	5e-05	0.000401447	yes	Mmp2	48.9236	66.4993	20.5167	20.3536
Nuak1	chr10:84371318-84440471	43.4908	15.4488	-1.49322	5e-05	0.000401447	yes	Nuak1	41.1501	43.0009	14.5408	15.3512
Tgfa	chr6:86195250-86275449	6.63613	2.35854	-1.49245	5e-05	0.000401447	yes	Tgfa	6.91113	5.92922	1.91404	2.64953
Paqr7	chr4:134496977-134508810	9.04675	3.22047	-1.49013	5e-05	0.000401447	yes	Paqr7	9.04424	8.46047	3.36483	2.86651
Glt28d2	chr3:85869845-85887518	6.12258	2.1805	-1.48948	5e-05	0.000401447	yes	Glt28d2	5.86845	5.97823	2.09825	2.12083
Nfic	chr10:81396190-81427173	36.2876	13.0242	-1.47828	5e-05	0.000401447	yes	Nfic	35.4821	34.7313	13.7821	11.4187
Ccdc80	chr16:45094052-45127924	1.67949	0.602834	-1.47819	0.00035	0.00234563	yes	Ccdc80	1.46146	1.78821	0.446603	0.719831
Gclc	chr9:77754534-77794489	65.5214	23.5282	-1.47757	5e-05	0.000401447	yes	Gclc	63.2451	63.5332	22.2427	23.2824
Tmem246	chr4:49584505-49597870	6.88992	2.48167	-1.47318	5e-05	0.000401447	yes	Tmem246	6.80164	6.52979	2.49963	2.30219
Nr4a1	chr15:101266845-101274794	232.672	84.2628	-1.46533	5e-05	0.000401447	yes	Nr4a1	160.715	289.487	61.4983	101.543
Ggct	chr6:54985094-54992867	10.7684	3.90003	-1.46525	5e-05	0.000401447	yes	Ggct	11.31	9.526	4.34912	3.19712
Eci1	chr17:24426682-24439316	13.8489	5.02028	-1.46393	5e-05	0.000401447	yes	Eci1	13.3249	13.4716	4.63179	5.08203
Itih5	chr2:10153542-10256529	4.04409	1.46619	-1.46374	5e-05	0.000401447	yes	Itih5	3.18262	4.64235	1.29725	1.53971
Aqp1	chr6:55336298-55348555	2.92271	1.05981	-1.4635	0.0002	0.00141578	yes	Aqp1	2.51614	3.13905	1.19846	0.852188
Rgag4	chrX:101849384-102092055	1.23942	0.449675	-1.46272	0.00355	0.0175686	yes	Rgag4	1.25424	1.14394	0.373533	0.49655
Hoxb9	chr11:96271329-96276593	4.77441	1.73427	-1.461	5e-05	0.000401447	yes	Hoxb9	4.65126	4.58683	1.55214	1.80352
Sfxn3	chr19:45047575-45056383	31.5072	11.4648	-1.45847	5e-05	0.000401447	yes	Sfxn3	32.1184	28.8453	9.82154	12.3618
Isoc2b	chr7:4844959-4866179	2.93794	1.07132	-1.45541	0.01105	0.0456668	yes	Isoc2b	3.66167	2.023	1.41939	0.653532
Clca1	chr3:144730315-144760739	2.77801	1.01336	-1.4549	0.00015	0.00109224	yes	Clca1	2.52328	2.85193	0.928585	1.03218
Moxd1	chr10:24223516-24302783	157.669	57.526	-1.45461	5e-05	0.000401447	yes	Moxd1	160.212	144.863	57.5928	53.7151
Plekhg6	chr6:125362650-125380504	12.9467	4.73145	-1.45223	5e-05	0.000401447	yes	Plekhg6	12.5405	12.5103	4.71191	4.44304
Epn3	chr11:94489598-94499974	6.43531	2.35242	-1.45187	5e-05	0.000401447	yes	Epn3	6.02289	6.42889	1.8946	2.65713
Tmco4	chr4:138972904-139059171	6.04484	2.21548	-1.44808	5e-05	0.000401447	yes	Tmco4	5.74997	5.9463	2.23151	2.05526
Sec14l2	chr11:4097039-4118729	4.26017	1.56166	-1.44784	5e-05	0.000401447	yes	Sec14l2	3.48025	4.76283	1.58689	1.43478
Tril	chr6:53815467-53820825	6.57925	2.41293	-1.44714	5e-05	0.000401447	yes	Tril	5.68786	7.04244	2.53811	2.13072
Cntfr	chr4:41657497-41697091	169.478	62.2328	-1.44535	5e-05	0.000401447	yes	Cntfr	166.833	161.093	63.6906	56.7246
Sox9	chr11:112782209-112787757	96.3569	35.4311	-1.44337	5e-05	0.000401447	yes	Sox9	90.8204	95.622	37.2853	31.271
Slc47a1	chr11:61343399-61378075	1.2556	0.461745	-1.44321	0.00555	0.0256173	yes	Slc47a1	1.61405	0.815424	0.296362	0.597076
Col15a1	chr4:47208011-47313165	2.0864	0.768607	-1.4407	5e-05	0.000401447	yes	Col15a1	1.33391	2.70311	0.657084	0.830107
Ddr2	chr1:169969408-170088944	1.49497	0.551392	-1.43897	5e-05	0.000401447	yes	Ddr2	1.36893	1.52372	0.631004	0.435892
2610203C20Rik	chr9:41581338-41592487	27.9021	10.3148	-1.43566	5e-05	0.000401447	yes	2610203C20Rik	28.3906	25.5975	9.81707	10.1411
Gcnt2	chr13:40859767-40960892	5.6871	2.10732	-1.43228	5e-05	0.000401447	yes	Gcnt2	5.38364	5.62041	2.10506	1.97243
Lgr4	chr2:109917646-110014257	167.134	61.959	-1.43162	5e-05	0.000401447	yes	Lgr4	159.843	163.546	55.9632	63.9223
Rtn4r	chr16:18127705-18152408	14.0118	5.21008	-1.42726	5e-05	0.000401447	yes	Rtn4r	13.5822	13.5294	5.08124	4.99983
Atp1a1	chr3:101576218-101604707	451.585	168.321	-1.42378	5e-05	0.000401447	yes	Atp1a1	440.244	433.534	165.362	160.326
Eps8l1	chr7:4464741-4479242	1.75356	0.655177	-1.42033	0.00295	0.0150133	yes	Eps8l1	1.76253	1.63046	0.892469	0.375243
Ccl27a	chr4:41760442-41774176	36.0969	13.5294	-1.41577	0.0024	0.0126031	yes	Ccl27a	37.0262	32.8182	13.2848	12.8935
Tnc	chr4:63959784-64047015	27.8723	10.4527	-1.41496	5e-05	0.000401447	yes	Tnc	26.4299	27.5006	9.54396	10.6811
Aldh1l1	chr6:90550847-90599171	8.21268	3.08363	-1.41322	5e-05	0.000401447	yes	Aldh1l1	7.64176	8.24908	2.63263	3.33394
Sdr42e1	chr8:117661398-117671515	9.98018	3.74745	-1.41315	5e-05	0.000401447	yes	Sdr42e1	10.6717	8.63913	4.21397	3.03704
Glt1d1	chr5:127632261-127707520	3.29755	1.23854	-1.41275	0.0015	0.00840496	yes	Glt1d1	3.82615	2.55433	0.917613	1.47886
Cables1	chr18:11821087-11945627	10.0576	3.78405	-1.41028	5e-05	0.000401447	yes	Cables1	10.3375	9.12314	4.07367	3.24816
Arhgap31	chr16:38598342-38713035	2.14725	0.808203	-1.4097	5e-05	0.000401447	yes	Arhgap31	1.90991	2.24484	0.763212	0.800592
Cobll1	chr2:65088338-65238626	22.4903	8.47569	-1.4079	5e-05	0.000401447	yes	Cobll1	21.8819	21.635	7.93855	8.46119
Ckmt1	chr2:121358640-121380940	81.1623	30.733	-1.40102	5e-05	0.000401447	yes	Ckmt1	82.4673	74.575	33.3023	26.1636
Serpini1	chr3:75557532-75642523	7.20686	2.73535	-1.39764	5e-05	0.000401447	yes	Serpini1	6.97284	6.97183	2.3118	2.98088
Sqrdl	chr2:122765358-122809551	1.57141	0.59762	-1.39476	0.00855	0.0370278	yes	Sqrdl	1.63906	1.40149	0.548669	0.607676
Mreg	chr1:72159232-72212307	10.9562	4.1708	-1.39335	5e-05	0.000401447	yes	Mreg	11.2165	9.98283	4.71428	3.35587
Rab38	chr7:88430272-88491572	33.9763	12.9932	-1.38677	5e-05	0.000401447	yes	Rab38	32.4389	33.3025	11.5831	13.5577
Gmds	chr13:31819585-32338544	22.3173	8.53597	-1.38653	5e-05	0.000401447	yes	Gmds	23.1608	20.0212	7.53974	8.97664
Rsph3b	chr17:6904715-6948356	2.1336	0.816685	-1.38544	0.0069	0.0308566	yes	Rsph3b	2.80488	1.32347	1.07205	0.508168
Rnf150	chr8:82863355-83091271	2.5554	0.978265	-1.38525	5e-05	0.000401447	yes	Rnf150	2.73825	2.20623	1.08677	0.806094
Syde1	chr10:78584502-78591964	2.99488	1.14838	-1.38291	5e-05	0.000401447	yes	Syde1	2.71611	3.07874	1.23042	0.991586
Efnb2	chr8:8617438-8660773	63.6613	24.4207	-1.38231	5e-05	0.000401447	yes	Efnb2	62.0594	61.12	21.8985	25.3536
Cpxm1	chr2:130390774-130397629	41.5273	15.9359	-1.38178	5e-05	0.000401447	yes	Cpxm1	38.7042	41.6476	16.134	14.7006
Nrip3	chr7:109758055-109781545	1.38545	0.532194	-1.38033	0.00165	0.00917385	yes	Nrip3	1.0187	1.66203	0.43947	0.59028
Thy1	chr9:44043383-44048579	14.6752	5.66362	-1.37358	5e-05	0.000401447	yes	Thy1	13.3245	15.0707	5.70478	5.25384
Plek2	chr12:78888696-78906938	30.5968	11.8356	-1.37025	5e-05	0.000401447	yes	Plek2	28.7695	30.4327	10.1519	12.749
Sema4b	chr7:80186840-80226524	27.4937	10.6432	-1.36917	5e-05	0.000401447	yes	Sema4b	28.0729	25.1251	10.3343	10.2593
Egr1	chr18:34861206-34864956	735.86	285.663	-1.36512	5e-05	0.000401447	yes	Egr1	678.952	744.876	262.397	290.336
Cd59a	chr2:104095800-104115351	14.4747	5.62568	-1.36344	5e-05	0.000401447	yes	Cd59a	14.8737	13.1337	4.96091	5.92431
Arap1	chr7:101348068-101412586	20.6236	8.02206	-1.36225	5e-05	0.000401447	yes	Arap1	19.1862	20.7187	7.638	7.88402
P2rx4	chr5:122707556-122729042	3.97462	1.54682	-1.36151	0.00055	0.00349958	yes	P2rx4	3.93989	3.75067	1.30029	1.69267
Tgfbr2	chr9:116087694-116175363	8.13858	3.17207	-1.35935	5e-05	0.000401447	yes	Tgfbr2	8.05848	7.68899	2.76082	3.37686
C920025E04Rik	chr17:36109029-36111676	6.40865	2.50326	-1.35621	0.0004	0.00264585	yes	C920025E04Rik	6.39697	6.00324	2.35599	2.48761
Megf6	chr4:154170712-154275721	112.12	43.7998	-1.35605	5e-05	0.000401447	yes	Megf6	105.35	111.593	45.2604	39.4884
Fat4	chr3:38886939-39011983	2.45322	0.958748	-1.35545	5e-05	0.000401447	yes	Fat4	1.94984	2.79693	0.947758	0.907338
Egfl6	chrX:166523006-166585716	6.92678	2.70963	-1.35409	5e-05	0.000401447	yes	Egfl6	5.35186	8.05088	2.74223	2.50068
Elovl5	chr9:77917364-77984519	36.7895	14.4346	-1.34976	5e-05	0.000401447	yes	Elovl5	36.7914	34.3931	14.6858	13.2439
Crim1	chr17:78200247-78376592	51.229	20.1084	-1.34916	5e-05	0.000401447	yes	Crim1	46.8252	52.2986	19.0924	19.8157
Fam83c	chr2:155829182-155834854	9.21633	3.61998	-1.34821	5e-05	0.000401447	yes	Fam83c	8.82008	9.01275	3.74716	3.25721
Mst1r	chr9:107906888-107920383	2.17841	0.856109	-1.34741	5e-05	0.000401447	yes	Mst1r	2.05575	2.15929	0.584482	1.07202
Abca1	chr4:53030788-53159895	17.3895	6.85221	-1.34358	5e-05	0.000401447	yes	Abca1	16.0661	17.5811	6.8114	6.44705
Sox11	chr12:27334267-27342718	5.55027	2.18854	-1.34259	5e-05	0.000401447	yes	Sox11	4.92878	5.81053	2.04408	2.19056
Casp14	chr10:78711994-78718293	3.95927	1.56279	-1.34111	5e-05	0.000401447	yes	Casp14	3.52213	4.13873	1.73099	1.29288
Gm2a	chr11:55097984-55113028	6.62193	2.61786	-1.33886	5e-05	0.000401447	yes	Gm2a	6.42999	6.38288	2.5054	2.55994
Sh2d4a	chr8:68276527-68347704	14.0966	5.58898	-1.33469	5e-05	0.000401447	yes	Sh2d4a	15.7733	11.5024	4.92158	5.89263
Itfg3	chr17:26212691-26244242	34.2795	13.592	-1.33458	5e-05	0.000401447	yes	Itfg3	34.4449	31.883	12.3165	13.9829
Foxq1	chr13:31558169-31560974	2.47089	0.981098	-1.33256	0.00035	0.00234563	yes	Foxq1	2.66606	2.11491	1.00481	0.893527
Tanc2	chr11:105589985-105929303	15.874	6.3031	-1.33253	5e-05	0.000401447	yes	Tanc2	15.3008	15.414	5.80984	6.38613
Fabp4	chr3:10204342-10208576	7.82807	3.1104	-1.33156	0.00595	0.027237	yes	Fabp4	5.65366	9.493	3.24795	2.77042
Magee1	chrX:105120395-105123911	6.06916	2.41275	-1.33082	5e-05	0.000401447	yes	Magee1	5.94919	5.79413	2.51202	2.15645
Clca2	chr3:144796558-144819494	11.3779	4.53023	-1.32858	5e-05	0.000401447	yes	Clca2	10.0181	11.9972	4.32723	4.43838
Sesn3	chr9:14276300-14326134	31.4069	12.527	-1.32603	5e-05	0.000401447	yes	Sesn3	28.7884	31.9812	10.7813	13.4575
Hmgn3	chr9:83109941-83146607	83.9349	33.4866	-1.32569	5e-05	0.000401447	yes	Hmgn3	84.942	77.4649	35.4491	29.3446
Adamtsl1	chr4:86053914-86428382	18.3921	7.3391	-1.32541	5e-05	0.000401447	yes	Adamtsl1	16.3963	19.1908	6.83581	7.36473
AI464131	chr4:41495600-41503075	24.189	9.66027	-1.32422	5e-05	0.000401447	yes	AI464131	24.2075	22.5963	9.79027	8.90153
Cited2	chr10:17723227-17725674	30.9665	12.387	-1.32188	5e-05	0.000401447	yes	Cited2	26.6771	33.2405	13.0236	10.9442
Adcy7	chr8:88272402-88329962	25.0033	10.0055	-1.32133	5e-05	0.000401447	yes	Adcy7	28.3682	20.0111	9.92757	9.43215
Tmem65	chr15:58782268-58823427	47.8081	19.1428	-1.32045	5e-05	0.000401447	yes	Tmem65	45.089	47.4156	17.9636	19.0762
Ly6d	chr15:74762055-74763567	95.1555	38.2063	-1.31648	5e-05	0.000401447	yes	Ly6d	102.903	81.2146	46.886	27.04
Txndc16	chr14:45134447-45219394	14.9632	6.00985	-1.31602	5e-05	0.000401447	yes	Txndc16	14.6284	14.3241	5.51949	6.10906
Ghr	chr15:3317759-3583230	15.6416	6.28894	-1.3145	5e-05	0.000401447	yes	Ghr	14.3199	15.9452	6.06182	6.10675
Endod1	chr9:14353989-14381242	4.1675	1.67583	-1.3143	5e-05	0.000401447	yes	Endod1	4.04096	4.0228	1.70069	1.54191
Kcnip3	chr2:127456497-127521370	5.89769	2.37175	-1.3142	5e-05	0.000401447	yes	Kcnip3	5.73507	5.67647	2.46239	2.12675
Fhdc1	chr3:84442195-84480439	4.64909	1.87591	-1.30936	5e-05	0.000401447	yes	Fhdc1	4.43195	4.56365	1.88946	1.74027
Tst	chr15:78399555-78405859	22.6513	9.14239	-1.30895	5e-05	0.000401447	yes	Tst	22.604	21.2245	8.52786	9.1619
Col17a1	chr19:47646340-47692042	324.075	130.823	-1.30872	5e-05	0.000401447	yes	Col17a1	310.352	316.706	125.81	127.321
Pnp	chr14:50944302-50953412	22.7224	9.20229	-1.30405	5e-05	0.000401447	yes	Pnp	21.9045	22.0614	9.09512	8.71054
Dsc3	chr18:19960929-20002097	154.922	62.9387	-1.29952	5e-05	0.000401447	yes	Dsc3	150.597	149.164	57.6602	64.1209
Nrep	chr18:33437018-33464029	309.252	125.727	-1.29849	5e-05	0.000401447	yes	Nrep	306.611	291.765	116.251	127.02
S100a1	chr3:90511033-90514330	8.20223	3.33515	-1.29827	0.00625	0.0283761	yes	S100a1	7.84459	8.02604	2.22213	4.2311
Cltb	chr13:54592938-54611272	55.1292	22.4193	-1.29807	5e-05	0.000401447	yes	Cltb	55.743	50.9273	21.0457	22.3338
Medag	chr5:149411805-149431703	1.58643	0.645437	-1.29744	0.0041	0.0198636	yes	Medag	1.31382	1.75579	0.26994	0.978927
Tcp11l2	chr10:84576946-84614355	7.90321	3.22204	-1.29446	5e-05	0.000401447	yes	Tcp11l2	7.96513	7.32691	3.06884	3.16554
Aldh4a1	chr4:139622893-139649691	68.6087	27.9719	-1.29441	5e-05	0.000401447	yes	Aldh4a1	68.4199	64.3323	26.3867	27.7367
Tenc1	chr15:102102987-102116401	22.2999	9.09946	-1.29318	5e-05	0.000401447	yes	Tenc1	20.0672	23.0812	9.97431	7.63239
Gng7	chr10:80948623-81014925	11.942	4.87951	-1.29123	5e-05	0.000401447	yes	Gng7	11.2767	11.8301	4.32138	5.12006
Ggt6	chr11:72435525-72438404	12.6007	5.15154	-1.29042	5e-05	0.000401447	yes	Ggt6	12.5247	11.8565	4.6336	5.3342
Timp2	chr11:118301060-118355411	28.1829	11.5462	-1.28741	5e-05	0.000401447	yes	Timp2	24.8841	29.6474	11.249	11.0919
Akr1b3	chr6:34303929-34317489	19.3348	7.94487	-1.28311	0.0079	0.0346804	yes	Akr1b3	22.6321	14.7791	9.35333	6.01932
Plcd1	chr9:119071527-119093496	6.46878	2.66046	-1.28182	5e-05	0.000401447	yes	Plcd1	5.62994	6.88661	2.83414	2.31363
Ttc39b	chr4:83220300-83324189	1.58389	0.651588	-1.28144	5e-05	0.000401447	yes	Ttc39b	1.55024	1.51445	0.660118	0.600651
Dok5	chr2:170731806-170879775	5.87574	2.42187	-1.27865	0.00025	0.00173352	yes	Dok5	4.89567	6.4734	3.12422	1.5619
Ppp3ca	chr3:136670769-136935779	34.8647	14.3964	-1.27606	5e-05	0.000401447	yes	Ppp3ca	31.537	35.9232	13.4745	14.3813
Chrm1	chr19:8664004-8683602	1.61014	0.666526	-1.27246	5e-05	0.000401447	yes	Chrm1	1.366	1.74949	0.807571	0.482101
Klhl3	chr13:58004956-58102428	1.73685	0.719863	-1.27068	0.00705	0.0314237	yes	Klhl3	1.37174	1.98893	0.64748	0.745395
Sparcl1	chr5:104079108-104114088	3.37025	1.39694	-1.27058	0.0001	0.000758012	yes	Sparcl1	2.27058	4.25057	1.05405	1.64892
Wnt7b	chr15:85535436-85593708	34.5109	14.3097	-1.27006	5e-05	0.000401447	yes	Wnt7b	33.9626	32.8132	12.8057	14.8824
Enox1	chr14:77156762-77721763	19.0105	7.89135	-1.26845	5e-05	0.000401447	yes	Enox1	18.3788	18.4049	7.1259	8.14319
Col4a6	chrX:141165402-141474076	12.6033	5.23323	-1.26803	5e-05	0.000401447	yes	Col4a6	12.3089	12.0774	4.91389	5.21197
Mfsd4	chr1:132026620-132068062	10.3298	4.2894	-1.26797	5e-05	0.000401447	yes	Mfsd4	9.77776	10.2096	3.41141	4.88822
Slitrk6	chr14:110748577-110755149	3.53421	1.47167	-1.26393	0.0001	0.000758012	yes	Slitrk6	3.57985	3.25856	1.43657	1.41099
Art4	chr6:136848450-136857600	15.5414	6.47269	-1.26368	5e-05	0.000401447	yes	Art4	14.364	15.7073	6.34672	6.17739
Sema3b	chr9:107598114-107609241	12.1433	5.05921	-1.26318	5e-05	0.000401447	yes	Sema3b	12.4787	11.0176	4.34166	5.44749
Krt79	chr15:101929331-101940324	463.113	192.973	-1.26296	5e-05	0.000401447	yes	Krt79	482.491	413.593	192.088	181.3
Gclm	chr3:122245556-122267215	33.6236	14.0171	-1.26229	5e-05	0.000401447	yes	Gclm	32.2164	32.8425	14.5268	12.5951
Myo1d	chr11:80482126-80780025	12.6322	5.26734	-1.26195	5e-05	0.000401447	yes	Myo1d	12.0574	12.3847	5.18696	5.0049
Angel1	chr12:86700501-86726460	13.2665	5.53603	-1.26086	5e-05	0.000401447	yes	Angel1	11.3509	14.3185	5.38855	5.32321
Cd34	chr1:194938820-194976959	1.96699	0.82089	-1.26073	0.00245	0.0128325	yes	Cd34	1.45729	2.34867	0.819306	0.769047
Vangl1	chr3:102156695-102204693	40.073	16.7285	-1.26033	5e-05	0.000401447	yes	Vangl1	40.3746	37.1634	15.3682	17.0001
Cpeb2	chr5:43151685-43289724	9.02612	3.76944	-1.25976	5e-05	0.000401447	yes	Cpeb2	8.32976	9.13503	3.43393	3.85963
Arsb	chr13:93771678-93943016	3.59192	1.50158	-1.25827	5e-05	0.000401447	yes	Arsb	2.97324	3.97682	1.55546	1.34997
Vcan	chr13:89655309-89742512	57.7188	24.1338	-1.25799	5e-05	0.000401447	yes	Vcan	56.2908	55.3903	21.0819	25.6151
Ada	chr2:163726570-163750239	4.33818	1.81395	-1.25796	0.00035	0.00234563	yes	Ada	4.35093	4.04309	1.78493	1.72491
Cdhr1	chr14:37077848-37098311	1.60735	0.672461	-1.25716	0.0011	0.00645094	yes	Cdhr1	1.2506	1.85949	0.552762	0.748393
Sox5	chr6:143828424-144209568	1.29089	0.541032	-1.25458	0.00015	0.00109224	yes	Sox5	1.1709	1.32686	0.457486	0.589365
Plbd1	chr6:136612070-136661893	27.2173	11.4227	-1.25262	5e-05	0.000401447	yes	Plbd1	26.7909	25.8724	11.2694	10.8326
Grhl1	chr12:24572286-24617391	36.6868	15.4157	-1.25087	5e-05	0.000401447	yes	Grhl1	35.828	35.158	14.7369	15.0911
Nrtn	chr17:56751324-56757530	31.0754	13.0893	-1.24738	5e-05	0.000401447	yes	Nrtn	28.947	31.1812	13.5037	11.823
Plat	chr8:22757743-22782848	5.68865	2.39679	-1.24698	5e-05	0.000401447	yes	Plat	5.98166	5.0254	2.39564	2.24196
D430041D05Rik	chr2:104143074-104410334	1.15591	0.488277	-1.24325	0.00015	0.00109224	yes	D430041D05Rik	1.05749	1.17909	0.514945	0.429829
Pou2f3	chr9:43123938-43205755	57.2558	24.2325	-1.24048	5e-05	0.000401447	yes	Pou2f3	57.9117	52.8734	22.6221	24.2657
Idh1	chr1:65158615-65186479	184.037	78.0529	-1.23747	5e-05	0.000401447	yes	Idh1	181.756	174.34	76.001	75.0248
Ehd3	chr17:73804840-73832093	1.76911	0.751463	-1.23525	0.0012	0.00692753	yes	Ehd3	1.79731	1.62577	1.07402	0.379997
Rnase4	chr14:51091076-51106151	27.516	11.6976	-1.23406	5e-05	0.000401447	yes	Rnase4	27.885	25.3563	10.9152	11.7186
Chl1	chr6:103510875-103733035	3.28248	1.39846	-1.23095	5e-05	0.000401447	yes	Chl1	3.55902	2.79231	1.36371	1.34219
Tmem53	chr4:117251988-117268580	7.71876	3.3	-1.2259	0.00175	0.00961594	yes	Tmem53	6.85772	8.07743	3.58773	2.79749
Slc6a17	chr3:107467547-107518018	2.89154	1.23723	-1.22473	5e-05	0.000401447	yes	Slc6a17	2.44592	3.14896	1.07291	1.32103
Pak3	chrX:143518590-143797796	4.13516	1.76954	-1.22457	5e-05	0.000401447	yes	Pak3	3.80281	4.19838	1.96507	1.45885
Nrbp2	chr15:76085593-76090013	100.353	42.9903	-1.223	5e-05	0.000401447	yes	Nrbp2	103.11	91.0648	39.5491	43.6335
Cnp	chr11:100574938-100581739	5.76787	2.47358	-1.22144	5e-05	0.000401447	yes	Cnp	4.8598	6.30055	2.06684	2.71934
Stbd1	chr5:92603050-92606579	4.71698	2.02517	-1.21982	0.0002	0.00141578	yes	Stbd1	4.00372	5.12324	2.46131	1.45722
Zfp36	chr7:28376783-28379228	174.311	74.8839	-1.21894	5e-05	0.000401447	yes	Zfp36	149.811	187.466	66.5481	78.346
Chdh	chr14:30008999-30527056	48.8848	21.0069	-1.21852	5e-05	0.000401447	yes	Chdh	48.5792	46.0087	21.581	19.0655
Angptl2	chr2:33136972-33371478	30.5173	13.1356	-1.21614	5e-05	0.000401447	yes	Angptl2	29.4151	29.6333	12.1938	13.2225
Decr1	chr4:15917239-15945507	6.91262	2.98253	-1.2127	5e-05	0.000401447	yes	Decr1	6.92067	6.45467	2.81575	2.95519
Soat1	chr1:156428107-156474328	10.6804	4.60873	-1.21253	5e-05	0.000401447	yes	Soat1	12.2157	8.45005	4.73463	4.18287
Pcdh9	chr14:93013699-93890669	2.02241	0.872984	-1.21205	5e-05	0.000401447	yes	Pcdh9	1.79099	2.12221	0.674829	1.01432
Mcc	chr18:44425059-44812182	15.4371	6.67367	-1.20985	5e-05	0.000401447	yes	Mcc	14.767	15.1026	6.88244	6.03054
Spsb1	chr4:149896283-149955006	4.84672	2.09883	-1.20742	5e-05	0.000401447	yes	Spsb1	4.8146	4.56339	2.12162	1.93945
Mansc1	chr6:134609206-134632488	1.32718	0.574892	-1.207	0.0116	0.0475853	yes	Mansc1	1.5336	1.03438	0.579059	0.533308
Capn1	chr19:5988544-6018459	58.1862	25.2122	-1.20655	5e-05	0.000401447	yes	Capn1	55.5364	57.049	23.4586	25.3249
Tmem30b	chr12:73543113-73546395	10.4251	4.5181	-1.20628	5e-05	0.000401447	yes	Tmem30b	10.4771	9.69463	4.57894	4.16321
Bgn	chrX:73483634-73495936	92.0685	39.9258	-1.20539	5e-05	0.000401447	yes	Bgn	87.8964	90.2485	41.5312	35.7219
Stard5	chr7:83632016-83642328	35.9002	15.5804	-1.20426	5e-05	0.000401447	yes	Stard5	37.8481	31.6158	13.5156	16.6312
Gucy1a2	chr9:3532348-3905787	1.08408	0.472087	-1.19934	5e-05	0.000401447	yes	Gucy1a2	1.09618	1.00143	0.499777	0.413672
Hoxa4	chr6:52169061-52213597	7.24666	3.15685	-1.19883	0.0115	0.0472864	yes	Hoxa4	7.39095	6.63073	3.08342	3.02482
Igfbp5	chr1:72858064-72874865	50.985	22.2182	-1.19833	5e-05	0.000401447	yes	Igfbp5	46.8955	51.7562	21.3353	21.6551
Nfkbib	chr7:28756173-28766524	25.3889	11.0642	-1.1983	5e-05	0.000401447	yes	Nfkbib	22.3712	26.7543	11.1445	10.2638
Gusb	chr5:129989020-130002828	8.79779	3.83466	-1.19804	5e-05	0.000401447	yes	Gusb	8.43692	8.58606	3.7524	3.66734
Aldh6a1	chr12:84409067-84450950	22.9839	10.0254	-1.19696	5e-05	0.000401447	yes	Aldh6a1	21.9673	22.5046	9.93233	9.46604
Rnf217	chr10:31501886-31609725	17.9113	7.81656	-1.19627	5e-05	0.000401447	yes	Rnf217	17.8102	16.8467	7.7389	7.38548
Cyp26b1	chr6:84571413-84593908	1.39521	0.609097	-1.19574	0.001	0.00594158	yes	Cyp26b1	0.860797	1.83882	0.625599	0.552953
Il17rc	chr6:113471454-113483163	15.8668	6.93249	-1.19456	5e-05	0.000401447	yes	Il17rc	15.5385	15.1624	7.59316	5.82063
Ccdc3	chr2:5137775-5230866	34.6594	15.15	-1.19393	5e-05	0.000401447	yes	Ccdc3	31.5287	35.5343	15.2993	14.0147
Bmp1	chr14:70474554-70520260	67.0282	29.3149	-1.19314	5e-05	0.000401447	yes	Bmp1	65.6806	64.0132	28.262	28.4598
Sh3tc2	chr18:61953074-62015719	2.92648	1.2826	-1.19009	0.0001	0.000758012	yes	Sh3tc2	2.26944	3.39304	1.2342	1.24753
Ephx1	chr1:180989555-181017495	36.4382	16.0254	-1.18509	5e-05	0.000401447	yes	Ephx1	38.0504	32.4544	16.0835	14.9243
9430076C15Rik	chr6:53287294-53397216	1.27423	0.560503	-1.18483	0.01	0.0420828	yes	9430076C15Rik	1.15491	1.31061	0.415246	0.669281
Sh3rf1	chr8:61224170-61396072	28.8732	12.713	-1.18342	5e-05	0.000401447	yes	Sh3rf1	27.1068	28.7603	12.4811	12.1175
Slc27a1	chr8:71568926-71586708	89.3902	39.3612	-1.18334	5e-05	0.000401447	yes	Slc27a1	91.6994	81.2631	39.1627	36.998
Atp8b1	chr18:64528978-64661000	6.25221	2.75382	-1.18293	5e-05	0.000401447	yes	Atp8b1	6.2095	5.888	2.43622	2.89218
Lrrc17	chr5:21483846-21645605	2.60121	1.14872	-1.17915	0.00265	0.0137036	yes	Lrrc17	2.09472	2.9384	1.12997	1.09271
Wwp1	chr4:19608299-19709004	24.8468	10.9797	-1.17822	5e-05	0.000401447	yes	Wwp1	21.7946	26.2818	9.73183	11.513
Gm7694	chr1:170298192-170306332	1.49167	0.659828	-1.17677	0.00285	0.0145651	yes	Gm7694	1.38784	1.49841	0.673569	0.603142
Rai14	chr15:10568977-10714631	31.3034	13.8583	-1.17557	5e-05	0.000401447	yes	Rai14	29.9564	30.6131	13.7413	13.0733
Cav2	chr6:17281340-17289011	42.3078	18.7309	-1.1755	5e-05	0.000401447	yes	Cav2	44.5192	37.3427	17.5938	18.6489
Plin2	chr4:86656564-86670059	40.4487	17.918	-1.17469	5e-05	0.000401447	yes	Plin2	41.3254	36.9395	17.73	16.9398
Tmem51	chr4:142030992-142088101	10.8447	4.80456	-1.17451	5e-05	0.000401447	yes	Tmem51	9.91401	11.0695	4.81381	4.48261
Acss2	chr2:155518042-155562743	5.46029	2.42214	-1.1727	5e-05	0.000401447	yes	Acss2	6.07088	4.49433	2.36571	2.32093
Diap3	chr14:86656322-87141114	20.0145	8.88069	-1.1723	5e-05	0.000401447	yes	Diap3	20.9614	17.765	7.01728	10.1661
Dkk3	chr7:112116018-112159057	22.915	10.1729	-1.17156	5e-05	0.000401447	yes	Dkk3	21.1004	23.2381	8.22635	11.4573
S100a6	chr3:90612893-90614414	68.3091	30.3618	-1.16982	5e-05	0.000401447	yes	S100a6	63.9995	68.1728	27.7701	30.9775
Hpn	chr7:31098724-31115326	7.75441	3.45026	-1.16831	5e-05	0.000401447	yes	Hpn	7.96596	7.03817	4.16427	2.5117
Arhgap25	chr6:87459384-87533235	7.18986	3.20256	-1.16674	5e-05	0.000401447	yes	Arhgap25	7.48268	6.42909	3.29152	2.90516
Rell1	chr5:63908897-63968897	40.0928	17.8716	-1.16567	5e-05	0.000401447	yes	Rell1	40.3835	37.1927	16.4532	18.1268
Dusp5	chr19:53529317-53541322	6.25951	2.79324	-1.16411	0.00185	0.0100478	yes	Dusp5	4.01358	8.09804	2.58159	2.82309
Cma1	chr14:55941450-55944661	6.48082	2.89934	-1.16045	0.00225	0.0119283	yes	Cma1	5.84396	6.69588	2.70447	2.90552
Eea1	chr10:95940662-96045518	19.1806	8.58547	-1.15968	5e-05	0.000401447	yes	Eea1	18.2732	18.8397	7.93646	8.6757
Pm20d2	chr4:33170405-33189737	5.55328	2.48729	-1.15876	5e-05	0.000401447	yes	Pm20d2	5.10094	5.64418	2.16646	2.64624
Nr4a2	chr2:57107225-57124003	1.13331	0.507814	-1.15816	0.0095	0.0403122	yes	Nr4a2	0.592878	1.59997	0.41568	0.566898
Exph5	chr9:53301669-53381158	2.11787	0.949393	-1.15754	5e-05	0.000401447	yes	Exph5	2.23169	1.86622	0.882971	0.954025
Lrrtm1	chr6:76881636-77979667	2.59324	1.16386	-1.15584	0.00205	0.0109681	yes	Lrrtm1	2.84283	2.17486	1.12576	1.12621
Klf3	chr5:64803522-64830129	19.3392	8.68004	-1.15575	5e-05	0.000401447	yes	Klf3	18.223	19.1967	8.08503	8.71011
Acer3	chr7:98213659-98309527	25.7249	11.5557	-1.15456	5e-05	0.000401447	yes	Acer3	25.3482	24.4272	11.4476	10.9116
Cib2	chr9:54545351-54560079	32.3443	14.5554	-1.15196	5e-05	0.000401447	yes	Cib2	32.7517	29.8317	14.0322	14.1312
Hdac4	chr1:91932748-92148393	21.3253	9.60606	-1.15055	5e-05	0.000401447	yes	Hdac4	19.8874	21.3753	8.71506	9.87186
Tmem106c	chr15:97964228-97970286	15.9974	7.21388	-1.14899	5e-05	0.000401447	yes	Tmem106c	17.0731	13.8806	7.10291	6.85535
Creb5	chr6:53573373-53695832	18.5346	8.3591	-1.1488	5e-05	0.000401447	yes	Creb5	17.4744	18.3886	8.71519	7.45896
Klf15	chr6:90462625-90475209	13.3284	6.01568	-1.14771	5e-05	0.000401447	yes	Klf15	13.9745	11.8149	5.75555	5.88428
Krt15	chr11:100131758-100135949	1857.09	838.485	-1.14719	5e-05	0.000401447	yes	Krt15	1844.37	1748.95	836.683	785.715
Abtb2	chr2:103566309-103718423	7.54216	3.4072	-1.14639	5e-05	0.000401447	yes	Abtb2	7.41795	7.17551	3.60412	2.98852
Stim1	chr7:102267823-102436855	31.7596	14.348	-1.14635	5e-05	0.000401447	yes	Stim1	30.9841	30.4681	14.5538	13.2083
Atp1b3	chr9:96332674-96364299	113.184	51.2044	-1.14433	5e-05	0.000401447	yes	Atp1b3	115.115	103.886	47.348	51.7281
Fxyd3	chr7:31059934-31076697	281.97	127.587	-1.14406	5e-05	0.000401447	yes	Fxyd3	295.361	250.226	121.061	125.808
Ddhd2	chr8:25725323-25754280	11.3868	5.15957	-1.14204	5e-05	0.000401447	yes	Ddhd2	10.5294	11.5031	4.84121	5.14213
Sema3a	chr5:13396783-13603485	11.1813	5.07203	-1.14045	5e-05	0.000401447	yes	Sema3a	10.9179	10.7169	4.01104	5.8029
Maf	chr8:115703252-115706894	9.01374	4.08934	-1.14026	5e-05	0.000401447	yes	Maf	8.90586	8.53497	4.05267	3.85985
Zfp608	chr18:54888044-54990180	6.67046	3.02886	-1.13901	5e-05	0.000401447	yes	Zfp608	7.07983	5.82695	3.03228	2.82831
Ace	chr11:105967944-105989964	3.9187	1.7796	-1.13882	5e-05	0.000401447	yes	Ace	3.81293	3.76942	1.9498	1.49357
Igfbp3	chr11:7206090-7213923	6.05236	2.75903	-1.13334	5e-05	0.000401447	yes	Igfbp3	4.84004	6.87076	2.49018	2.84831
Wipi1	chr11:109573520-109611389	32.3689	14.7639	-1.13253	5e-05	0.000401447	yes	Wipi1	32.0984	30.5327	13.9428	14.6242
Cdo1	chr18:46713204-46728342	2.76585	1.26278	-1.13112	0.0095	0.0403122	yes	Cdo1	2.54275	2.80894	1.47252	0.970844
Retsat	chr6:72598627-72607488	8.4305	3.8518	-1.13008	5e-05	0.000401447	yes	Retsat	9.65813	6.65417	4.1271	3.32582
Acot1	chr12:84009501-84017669	110.059	50.3161	-1.12918	5e-05	0.000401447	yes	Acot1	108.546	104.409	45.4544	51.903
Svil	chr18:5046588-5119293	53.8882	24.659	-1.12786	5e-05	0.000401447	yes	Svil	50.7476	53.5214	24.58	23.1331
Lphn2	chr3:148815585-148954635	49.9651	22.9241	-1.12405	5e-05	0.000401447	yes	Lphn2	48.6072	48.0712	21.3489	23.0074
Tlr3	chr8:45395664-45410539	1.09322	0.502028	-1.12274	0.0055	0.0254443	yes	Tlr3	1.08059	1.03469	0.439768	0.531615
Il13ra1	chrX:36112138-36171261	23.2691	10.7031	-1.12039	5e-05	0.000401447	yes	Il13ra1	23.1138	21.91	9.77408	10.9355
5730559C18Rik	chr1:136213521-136234280	9.94876	4.57637	-1.12031	5e-05	0.000401447	yes	5730559C18Rik	8.96356	10.2865	4.14364	4.71125
Smtn	chr11:3517521-3539292	21.1913	9.75316	-1.11953	5e-05	0.000401447	yes	Smtn	19.946	21.0574	10.7333	8.13828
H2-T9	chr17:36038408-36042702	6.80732	3.13761	-1.11742	0.00135	0.00767726	yes	H2-T9	7.28174	5.88984	3.88122	2.18979
Sv2a	chr3:96181226-96195180	2.1847	1.0072	-1.11709	0.00085	0.00516861	yes	Sv2a	2.10306	2.12415	0.926782	1.02206
Farp1	chr14:121035573-121283726	102.782	47.4019	-1.11657	5e-05	0.000401447	yes	Farp1	96.6252	102.249	45.4694	46.2493
4930451G09Rik	chr16:4964287-4978962	3.04239	1.40575	-1.11387	0.0019	0.0102736	yes	4930451G09Rik	3.1348	2.75196	1.71507	1.00494
Ypel2	chr11:86936424-86993762	12.003	5.55489	-1.11157	5e-05	0.000401447	yes	Ypel2	11.5201	11.7047	5.23605	5.51218
Ugp2	chr11:21321140-21370879	37.1273	17.1856	-1.11128	5e-05	0.000401447	yes	Ugp2	37.5953	34.243	16.622	16.6306
Kcnab3	chr11:69326257-69333041	2.23889	1.03646	-1.11113	0.00395	0.0192823	yes	Kcnab3	2.28755	2.04451	0.886833	1.11862
Nudt6	chr3:37404983-37419590	5.26791	2.44413	-1.10791	0.0053	0.0247347	yes	Nudt6	5.77643	4.41653	1.8109	2.91829
Apobec3	chr15:79889531-79908429	2.05059	0.952627	-1.10606	0.00535	0.0248919	yes	Apobec3	2.21735	1.75038	0.55814	1.28511
Il1f5	chr2:24276953-24282432	8.15227	3.79037	-1.10486	5e-05	0.000401447	yes	Il1f5	7.88743	7.88653	3.85657	3.47747
Ctsb	chr14:63122461-63177793	104.402	48.5531	-1.10452	5e-05	0.000401447	yes	Ctsb	103.404	98.6061	47.4805	46.4656
Ppp1r14c	chr10:3366149-3464975	90.7091	42.1915	-1.10429	5e-05	0.000401447	yes	Ppp1r14c	87.1175	88.397	42.9573	38.6798
Slc39a14	chr14:70303466-70351424	12.9963	6.05104	-1.10285	5e-05	0.000401447	yes	Slc39a14	12.03	13.1168	6.53477	5.17348
Epb4.1l4b	chr4:57061725-57143156	47.7533	22.2961	-1.09881	5e-05	0.000401447	yes	Epb4.1l4b	45.6291	46.7696	21.9799	21.1611
Fam160a1	chr3:85660062-85746209	13.7256	6.41531	-1.09728	5e-05	0.000401447	yes	Fam160a1	13.3225	13.2353	5.91619	6.49689
Irx1	chr13:71958231-71963723	111.513	52.1484	-1.09652	5e-05	0.000401447	yes	Irx1	105.109	110.66	57.0152	43.8875
Tnfrsf18	chr4:156026341-156028891	20.9173	9.79146	-1.0951	5e-05	0.000401447	yes	Tnfrsf18	20.8915	19.5817	8.92368	10.022
Zfp365	chr10:67886104-67912662	7.74936	3.63449	-1.09232	5e-05	0.000401447	yes	Zfp365	7.67264	7.32172	3.82428	3.20816
Lrig3	chr10:125966218-126015359	63.4312	29.7503	-1.09229	5e-05	0.000401447	yes	Lrig3	59.8426	62.8914	29.0902	28.4742
Fam114a1	chr5:64970074-65041901	3.83834	1.80049	-1.09209	5e-05	0.000401447	yes	Fam114a1	2.95488	4.47198	1.57722	1.90658
Cdkn1a	chr17:29090985-29100722	44.8949	21.0953	-1.08963	5e-05	0.000401447	yes	Cdkn1a	44.0231	42.8448	22.421	18.3967
Krt80	chr15:101349570-101370125	26.4584	12.4462	-1.08802	5e-05	0.000401447	yes	Krt80	24.8468	26.3479	13.4625	10.6198
Vat1	chr11:101458747-101466199	31.1837	14.6699	-1.08794	5e-05	0.000401447	yes	Vat1	29.9609	30.3771	14.7163	13.6687
Snx33	chr9:56917199-56928371	9.11417	4.28918	-1.08741	5e-05	0.000401447	yes	Snx33	8.71965	8.91551	4.57702	3.72218
Igsf8	chr1:172312406-172319835	29.6528	13.9579	-1.08709	5e-05	0.000401447	yes	Igsf8	28.7033	28.6723	14.2447	12.7626
Ppap2c	chr10:79526428-79533787	23.7042	11.1716	-1.0853	5e-05	0.000401447	yes	Ppap2c	24.5287	21.3369	11.9702	9.64596
Tchh	chr3:93442329-93449077	2.28629	1.07792	-1.08476	0.00015	0.00109224	yes	Tchh	2.6254	1.79837	0.938326	1.14735
Eva1a	chr6:82041627-82093099	19.4649	9.18234	-1.08394	5e-05	0.000401447	yes	Eva1a	16.8025	20.8605	8.21033	9.55672
Ephx2	chr14:66084371-66124522	4.3543	2.05422	-1.08385	0.00065	0.00404312	yes	Ephx2	4.82436	3.60083	2.1081	1.86665
Slc16a2	chrX:103697413-103821988	1.53032	0.722846	-1.08207	0.00245	0.0128325	yes	Slc16a2	1.72171	1.23932	0.733567	0.66508
Epha4	chr1:77367184-77515088	18.877	8.92193	-1.0812	5e-05	0.000401447	yes	Epha4	18.526	17.9995	8.64452	8.61867
Fbxl16	chr17:25809084-25821265	1.12019	0.529628	-1.08069	0.0118	0.0481791	yes	Fbxl16	1.06867	1.09879	0.493986	0.5308
L3hypdh	chr12:72073427-72085313	11.7423	5.55901	-1.07881	5e-05	0.000401447	yes	L3hypdh	12.0434	10.6769	5.40026	5.35595
Pkp1	chr1:135871394-135919024	240.275	114.049	-1.07503	5e-05	0.000401447	yes	Pkp1	236.396	228.516	106.005	114.669
Col3a1	chr1:45311537-45349706	121.839	57.8682	-1.07413	5e-05	0.000401447	yes	Col3a1	75.6826	160.066	59.0665	52.9037
Tsc22d3	chrX:140539528-140600522	6.75003	3.20843	-1.07303	0.0001	0.000758012	yes	Tsc22d3	7.10256	5.95818	3.76055	2.44749
Agl	chr3:116739998-116808166	15.6448	7.43896	-1.07251	5e-05	0.000401447	yes	Agl	14.1191	16.1523	6.48451	7.90925
Zfp185	chrX:72987338-73031543	13.4327	6.39013	-1.07184	5e-05	0.000401447	yes	Zfp185	12.4326	13.5586	6.79922	5.56515
Cpd	chr11:76777207-76847008	23.8637	11.361	-1.07073	5e-05	0.000401447	yes	Cpd	22.8455	23.3288	10.6358	11.3468
Kank1	chr19:25237201-25434496	45.1111	21.4981	-1.06927	5e-05	0.000401447	yes	Kank1	41.1683	46.1178	21.0635	20.5335
Kctd7	chr5:130144887-130155808	1.45887	0.696594	-1.06646	0.0036	0.01778	yes	Kctd7	1.30356	1.51922	0.736401	0.611451
Edn2	chr4:120161423-120167360	35.4738	16.9411	-1.06623	5e-05	0.000401447	yes	Edn2	34.2534	34.3854	18.8699	13.9096
Fbxo44	chr4:148152799-148160064	3.0368	1.451	-1.06551	0.0056	0.0257993	yes	Fbxo44	3.6385	2.23745	1.4432	1.36436
Arhgef10	chr8:14911716-15001085	29.9259	14.2998	-1.0654	5e-05	0.000401447	yes	Arhgef10	28.3537	29.5504	15.0973	12.5716
Il22ra1	chr4:135728158-135755383	2.28547	1.09238	-1.06501	0.0001	0.000758012	yes	Il22ra1	2.21956	2.20264	1.01886	1.09481
Tex40	chr19:6922425-6925380	11.614	5.5538	-1.06432	0.0017	0.00940045	yes	Tex40	10.3996	12.0725	5.02764	5.71851
Akap2	chr4:57845247-57896984	10.2389	4.89781	-1.06385	5e-05	0.000401447	yes	Akap2	9.0442	10.7672	4.47239	5.00446
Klk10	chr7:43781053-43785410	11.526	5.51447	-1.0636	5e-05	0.000401447	yes	Klk10	11.1011	11.2008	5.22324	5.4468
Mctp2	chr7:72077829-72306595	1.80868	0.866614	-1.06147	0.0003	0.00205109	yes	Mctp2	1.69041	1.80923	0.73241	0.944415
Anxa6	chr11:54978961-55033471	63.8084	30.6101	-1.05974	5e-05	0.000401447	yes	Anxa6	58.8918	64.5721	28.9177	30.3102
Arl4d	chr11:101665540-101667832	4.06905	1.95477	-1.05769	0.0067	0.0300724	yes	Arl4d	2.85074	5.02254	1.72615	2.05617
Tlcd2	chr11:75468078-75470644	12.3982	5.95719	-1.05743	0.0003	0.00205109	yes	Tlcd2	13.5256	10.464	4.58705	6.93962
Fam81a	chr9:70089309-70141557	6.16789	2.96534	-1.05658	5e-05	0.000401447	yes	Fam81a	6.20901	5.72534	2.59149	3.14621
Acacb	chr5:114165517-114250758	1.74455	0.839027	-1.05606	5e-05	0.000401447	yes	Acacb	2.03081	1.34474	0.825296	0.798151
Fam63b	chr9:70599013-70657174	8.92686	4.29495	-1.05551	5e-05	0.000401447	yes	Fam63b	8.38742	8.88531	3.9669	4.34347
Btbd3	chr2:138256583-138287422	35.765	17.2127	-1.05508	5e-05	0.000401447	yes	Btbd3	34.5825	34.6199	15.9611	17.344
Sord	chr2:122234838-122265337	12.0697	5.81258	-1.05414	5e-05	0.000401447	yes	Sord	11.7789	11.5749	5.54592	5.70093
Osbpl5	chr7:143688761-143741963	42.6375	20.589	-1.05025	5e-05	0.000401447	yes	Osbpl5	41.0535	41.4464	20.0458	19.7922
Acsl1	chr8:46471041-46536050	16.5324	7.99161	-1.04874	5e-05	0.000401447	yes	Acsl1	16.0081	15.9806	7.98168	7.4814
Gas6	chr8:13465373-13494535	45.2681	21.8822	-1.04873	5e-05	0.000401447	yes	Gas6	46.0947	41.4953	22.7903	19.55
Junb	chr8:84976908-84978748	282.98	136.874	-1.04785	5e-05	0.000401447	yes	Junb	259.593	287.95	124.911	139.929
Snta1	chr2:154376313-154408084	4.48389	2.1692	-1.04759	0.0008	0.00489383	yes	Snta1	4.73702	3.93894	2.15684	2.04038
Tbc1d8b	chrX:139684995-139754218	6.91994	3.35532	-1.04431	5e-05	0.000401447	yes	Tbc1d8b	6.25322	7.13629	3.33178	3.16048
Srcin1	chr11:97509339-97575126	18.9593	9.19583	-1.04385	5e-05	0.000401447	yes	Srcin1	19.2637	17.4209	8.83136	8.96179
Ptrf	chr11:100956735-100970617	52.4659	25.4949	-1.04117	5e-05	0.000401447	yes	Ptrf	48.7311	52.7859	24.8425	24.488
Rundc3a	chr11:102393402-102402939	2.58451	1.25882	-1.03783	0.00325	0.016282	yes	Rundc3a	2.52197	2.47885	1.00445	1.43125
Cd248	chr19:5068077-5070639	3.06307	1.49244	-1.0373	0.00225	0.0119283	yes	Cd248	1.80392	4.12286	1.41179	1.47596
Creb3l4	chr3:90237499-90243512	8.01913	3.91298	-1.03518	0.00025	0.00173352	yes	Creb3l4	8.47818	7.03816	3.75211	3.81919
Dpysl2	chr14:66802863-66868600	3.30014	1.61185	-1.03382	0.00015	0.00109224	yes	Dpysl2	2.86378	3.52172	1.90885	1.20994
Cpsf4l	chr11:113698170-113710017	23.1054	11.3199	-1.02937	5e-05	0.000401447	yes	Cpsf4l	20.5216	24.1854	10.0643	11.8387
Pcolce	chr5:137605106-137611404	4.88623	2.39828	-1.02672	0.0028	0.0143516	yes	Pcolce	3.14228	6.31216	2.9258	1.71467
Atf5	chr7:44812255-44849079	60.9451	29.9196	-1.02642	0.001	0.00594158	yes	Atf5	62.5931	55.3305	31.794	26.0979
Serpinb8	chr1:107590005-107608978	13.3903	6.57613	-1.02588	5e-05	0.000401447	yes	Serpinb8	13.4002	12.5089	5.58194	7.14232
Bre	chr5:31698049-32084739	36.5979	17.9934	-1.02429	5e-05	0.000401447	yes	Bre	36.3966	34.4173	15.2196	19.5962
Tgfb2	chr1:186623185-186705992	162.971	80.1587	-1.02368	5e-05	0.000401447	yes	Tgfb2	151.027	164.308	75.9072	79.1931
Sgpp1	chr12:75714247-75735729	26.2074	12.898	-1.02283	5e-05	0.000401447	yes	Sgpp1	26.852	23.8571	11.9325	13.024
Prrt2	chr7:127017541-127021211	4.03592	1.98704	-1.02228	0.0006	0.00377055	yes	Prrt2	3.75579	4.05336	2.00615	1.8386
Tmbim1	chr1:74285033-74353692	33.4338	16.4804	-1.02056	5e-05	0.000401447	yes	Tmbim1	32.1818	32.5098	16.421	15.4672
Lpcat3	chr6:124663103-124712178	24.6231	12.1523	-1.01878	0.00125	0.00717207	yes	Lpcat3	25.2489	22.3947	11.4664	12.0473
Frk	chr10:34483399-34611230	2.2061	1.08898	-1.01852	0.00055	0.00349958	yes	Frk	2.05586	2.21277	1.02098	1.08612
Artn	chr4:117926161-117929763	2.15418	1.06492	-1.0164	0.0106	0.0442416	yes	Artn	1.89553	2.27262	1.18158	0.878942
Nedd4l	chr18:64887755-65217826	7.20152	3.5625	-1.01541	5e-05	0.000401447	yes	Nedd4l	6.97086	6.96348	3.7317	3.16143
Gnai1	chr5:18265134-18360413	15.4388	7.66282	-1.01062	5e-05	0.000401447	yes	Gnai1	14.8743	14.9986	6.01257	8.81435
Fgfrl1	chr5:108694228-108706950	3.90433	1.93812	-1.01042	0.0006	0.00377055	yes	Fgfrl1	3.64216	3.9124	2.09299	1.65712
Glrx	chr13:75839885-75850151	9.95049	4.94265	-1.00948	0.00055	0.00349958	yes	Glrx	9.75622	9.49714	4.24396	5.31965
Dpt	chr1:164796731-164824266	4.62496	2.30129	-1.007	0.00335	0.0167144	yes	Dpt	3.05088	5.89803	2.04998	2.40282
Wwc2	chr8:47827605-47990551	12.9831	6.46252	-1.00647	5e-05	0.000401447	yes	Wwc2	12.3138	12.8075	6.86542	5.63902
Ptpla	chr2:14026830-14056035	18.1627	9.04323	-1.00607	0.0001	0.000758012	yes	Ptpla	19.195	15.9484	9.55188	7.94601
Eya2	chr2:165595027-165771727	25.9209	12.9321	-1.00316	5e-05	0.000401447	yes	Eya2	26.4901	23.6647	13.4741	11.5484
Isoc1	chr18:58659481-58679570	107.589	53.677	-1.00315	5e-05	0.000401447	yes	Isoc1	101.331	106.845	50.9938	52.8666
Fhod1	chr8:105329159-105347970	1.55349	0.775246	-1.00279	0.00435	0.0208595	yes	Fhod1	1.48028	1.5256	0.798247	0.701789
Ampd3	chr7:110768205-110812408	12.1313	6.06321	-1.00058	5e-05	0.000401447	yes	Ampd3	11.933	11.54	6.23978	5.49203
Gtf2ird1	chr5:134357660-134456716	54.9152	109.842	1.00015	5e-05	0.000401447	yes	Gtf2ird1	53.1521	53.1043	102.956	109.579
Chst15	chr7:132236254-132318291	10.2369	20.4984	1.00174	5e-05	0.000401447	yes	Chst15	9.70663	10.1008	19.0841	20.5785
Spry2	chr14:105891946-105896819	24.8014	49.665	1.00181	5e-05	0.000401447	yes	Spry2	20.6343	27.3542	49.3298	46.7678
Zfp647	chr15:76910369-76925448	2.84884	5.71216	1.00366	0.00025	0.00173352	yes	Zfp647	2.56496	2.94731	5.2238	5.82875
Tmc7	chr7:118535843-118584686	2.91649	5.85184	1.00466	5e-05	0.000401447	yes	Tmc7	2.50974	3.13342	4.77892	6.5439
Nsmaf	chr4:6396207-6454271	8.94321	17.9468	1.00487	5e-05	0.000401447	yes	Nsmaf	8.17603	9.12833	16.7604	17.9653
Nfasc	chr1:132564689-132741797	0.537362	1.07859	1.00517	0.00065	0.00404312	yes	Nfasc	0.442639	0.597112	0.912224	1.17475
Ifngr2	chr16:91547093-91564007	20.6472	41.523	1.00796	5e-05	0.000401447	yes	Ifngr2	21.0404	18.9102	37.7228	42.6207
Optn	chr2:5020641-5063938	1.35672	2.73273	1.01022	0.00495	0.0233063	yes	Optn	1.28215	1.34299	2.07476	3.21283
Aldh3b2	chr19:3972327-3981665	7.67834	15.4771	1.01127	5e-05	0.000401447	yes	Aldh3b2	8.53442	6.32253	15.2544	14.6924
Gpsm1	chr2:26315532-26352110	4.52742	9.13278	1.01236	0.0009	0.00544281	yes	Gpsm1	4.06827	4.69192	8.92714	8.74402
Degs2	chr12:108410654-108702306	13.305	26.8671	1.01387	0.00065	0.00404312	yes	Degs2	12.1612	13.5829	26.8875	25.098
Pvrl4	chr1:171370172-171388287	10.9372	22.0882	1.01404	5e-05	0.000401447	yes	Pvrl4	10.877	10.2855	20.7286	22.0101
Glis2	chr16:4594712-4615957	7.25202	14.6662	1.01604	5e-05	0.000401447	yes	Glis2	6.60714	7.42491	14.5436	13.8342
1300002E11Rik	chr16:21794346-21809039	8.617	17.4453	1.01758	0.00205	0.0109681	yes	1300002E11Rik	7.66204	9.01113	15.4221	18.333
Pxdn	chr12:29938035-30017658	27.2361	55.1584	1.01806	5e-05	0.000401447	yes	Pxdn	26.4983	26.2013	53.0742	53.6527
Pcsk5	chr19:17432831-17837632	1.62655	3.29476	1.01835	5e-05	0.000401447	yes	Pcsk5	1.39988	1.74737	3.19741	3.17767
Rab31	chr17:65651725-65772752	2.78438	5.64337	1.0192	5e-05	0.000401447	yes	Rab31	2.51087	2.87666	5.08467	5.83477
Ikzf2	chr1:69531209-69685960	0.577687	1.17355	1.02252	0.0006	0.00377055	yes	Ikzf2	0.642156	0.47562	0.979268	1.29145
Nes	chr3:87971092-87980451	3.35301	6.84816	1.03026	5e-05	0.000401447	yes	Nes	3.1044	3.38339	7.63202	5.6186
Sema4d	chr13:51701247-51793644	6.49445	13.2734	1.03126	5e-05	0.000401447	yes	Sema4d	6.36637	6.19984	12.5151	13.1678
Zfp618	chr4:62965573-63134030	7.76254	15.8659	1.03133	5e-05	0.000401447	yes	Zfp618	7.02775	7.99211	15.2628	15.4364
Tnip1	chr11:54910786-54962940	16.1611	33.041	1.03173	5e-05	0.000401447	yes	Tnip1	16.1056	15.1647	32.8149	31.1166
Herc3	chr6:58833699-58920396	3.42163	7.00981	1.03469	5e-05	0.000401447	yes	Herc3	3.0867	3.53386	6.51725	7.04615
Fam174b	chr7:73740306-73776919	1.05567	2.17409	1.04224	0.00525	0.0245201	yes	Fam174b	0.877276	1.16537	2.32944	1.87724
Dock4	chr12:40446052-40846488	0.912734	1.88209	1.04407	0.0001	0.000758012	yes	Dock4	0.849037	0.917027	1.68036	1.96132
Ccdc88c	chr12:100912699-101028983	3.25682	6.71906	1.0448	5e-05	0.000401447	yes	Ccdc88c	3.33902	2.96265	6.93232	6.0685
Prickle1	chr15:93499113-93595891	5.76352	11.8993	1.04585	5e-05	0.000401447	yes	Prickle1	4.9352	6.21673	11.3222	11.702
Tmem50b	chr16:91574507-91597680	6.97895	14.4302	1.04801	5e-05	0.000401447	yes	Tmem50b	6.34536	7.15833	15.0251	12.8962
Irak1bp1	chr9:82829805-82847688	3.02435	6.26207	1.05001	0.00025	0.00173352	yes	Irak1bp1	2.25531	3.59656	6.57481	5.54178
Cbx2	chr11:119023028-119031270	24.2413	50.1935	1.05003	5e-05	0.000401447	yes	Cbx2	22.9485	23.9565	50.0901	47.03
Rhbdl2	chr4:123787874-123829904	3.10432	6.45189	1.05544	0.00165	0.00917385	yes	Rhbdl2	2.97427	3.03233	7.02945	5.45442
Rab11fip4	chr11:79591211-79694012	5.17305	10.7542	1.05582	5e-05	0.000401447	yes	Rab11fip4	4.72474	5.28468	10.7143	10.0942
1810058I24Rik	chr6:35252698-35262059	49.0534	102.071	1.05715	5e-05	0.000401447	yes	1810058I24Rik	49.0467	45.8675	97.9657	99.533
Nhlrc1	chr13:47012556-47014850	2.08648	4.34194	1.05727	0.00075	0.00461806	yes	Nhlrc1	2.18973	1.84742	3.69386	4.70742
Gm8801	chr17:35947153-35953317	3.00329	6.26332	1.06038	0.00045	0.00294151	yes	Gm8801	1.89139	3.91973	5.80028	6.31872
Synpo	chr18:60593989-60624305	11.4052	23.8404	1.06372	5e-05	0.000401447	yes	Synpo	10.3812	11.6869	25.2898	20.8394
Plxnc1	chr10:94790865-94944578	1.33313	2.78767	1.06424	5e-05	0.000401447	yes	Plxnc1	1.07354	1.50595	2.54144	2.85246
Krt16	chr11:100246090-100248902	2.04252	4.27118	1.06429	0.00365	0.0179688	yes	Krt16	1.99561	1.95649	4.37266	3.89172
Calhm2	chr19:47132231-47138294	4.50834	9.43164	1.06491	5e-05	0.000401447	yes	Calhm2	4.45277	4.27049	9.80254	8.4469
Prss35	chr9:86743632-86757506	26.4514	55.3512	1.06527	5e-05	0.000401447	yes	Prss35	24.9886	26.1927	58.8392	48.2608
Map1b	chr13:99421463-99516602	5.7027	11.9358	1.06557	5e-05	0.000401447	yes	Map1b	4.5196	6.51463	11.2114	11.8833
Pdgfc	chr3:81036415-81214031	14.817	31.0139	1.06567	5e-05	0.000401447	yes	Pdgfc	13.1545	15.515	28.0206	31.9888
Slc39a11	chr11:113244854-113565815	6.89502	14.4372	1.06616	5e-05	0.000401447	yes	Slc39a11	6.50222	6.83906	13.919	14.0157
Slc25a33	chr4:149744035-149774267	6.53503	13.697	1.06759	5e-05	0.000401447	yes	Slc25a33	6.18543	6.45931	13.5085	12.994
2610307P16Rik	chr13:28460033-28885422	3.86431	8.10266	1.06818	5e-05	0.000401447	yes	2610307P16Rik	3.43128	4.04584	7.0552	8.62276
Laptm4b	chr15:34238025-34284295	11.5355	24.223	1.07029	5e-05	0.000401447	yes	Laptm4b	13.4023	8.91795	23.2223	23.6471
Fut10	chr8:31187331-31261483	3.88967	8.16878	1.07047	5e-05	0.000401447	yes	Fut10	4.20768	3.3185	7.02887	8.77703
Ankrd6	chr4:32804034-32950826	2.69572	5.66675	1.07185	5e-05	0.000401447	yes	Ankrd6	2.79624	2.41975	5.518	5.44669
Cybrd1	chr2:71118053-71142926	0.515246	1.08314	1.07189	0.00395	0.0192823	yes	Cybrd1	0.488073	0.508885	0.925632	1.17016
2310003H01Rik	chr11:120369561-120378746	17.6228	37.163	1.07643	5e-05	0.000401447	yes	2310003H01Rik	16.0903	18.0083	36.9292	34.9781
Lrrc55	chr2:85188070-85196699	0.747858	1.5781	1.07735	0.00945	0.0401839	yes	Lrrc55	0.744179	0.702864	1.70578	1.34771
Thbs3	chr3:89215186-89226837	1.88077	3.97145	1.07834	0.0003	0.00205109	yes	Thbs3	1.54575	2.09339	3.97112	3.7133
Lrp3	chr7:35186384-35215345	5.41899	11.4541	1.07976	5e-05	0.000401447	yes	Lrp3	6.13919	4.34611	11.5689	10.5938
Ppp1r9a	chr6:4903319-5165661	0.95932	2.02774	1.07979	5e-05	0.000401447	yes	Ppp1r9a	0.86885	0.987354	1.73707	2.18643
Grasp	chr15:101221190-101232756	40.7597	86.3369	1.08283	5e-05	0.000401447	yes	Grasp	39.4109	39.4557	80.9898	86.0648
Wipf1	chr2:73429616-73529410	1.65829	3.51318	1.08308	5e-05	0.000401447	yes	Wipf1	1.30336	1.9053	3.41675	3.38096
Tfrc	chr16:32608895-32632794	27.8264	58.9875	1.08395	5e-05	0.000401447	yes	Tfrc	30.2019	23.6398	55.177	58.9588
Nceh1	chr3:27183003-27244911	0.637498	1.3529	1.08556	0.00365	0.0179688	yes	Nceh1	0.561844	0.671662	1.53646	1.08128
Lama4	chr10:38965514-39110188	2.95785	6.29121	1.08879	5e-05	0.000401447	yes	Lama4	2.30943	3.41377	5.65007	6.52289
Rassf8	chr6:145808382-145817584	3.25605	6.94976	1.09384	0.00025	0.00173352	yes	Rassf8	2.86273	3.43746	6.12004	7.32717
Lrrc56	chr7:141194129-141214080	7.77519	16.6287	1.09673	5e-05	0.000401447	yes	Lrrc56	7.54863	7.49571	16.5744	15.6008
Syne4	chr7:30314815-30319045	1.94744	4.16899	1.09812	0.0041	0.0198636	yes	Syne4	1.85019	1.91794	3.61018	4.45647
Lrrk2	chr15:91673223-91816124	0.532354	1.14302	1.10239	0.0006	0.00377055	yes	Lrrk2	0.484268	0.545792	0.930842	1.28081
Samhd1	chr2:157097528-157135222	11.4429	24.5804	1.10306	5e-05	0.000401447	yes	Samhd1	10.6387	11.5023	24.0036	23.5574
Serpine2	chr1:79794320-79858665	8.23934	17.7079	1.10379	5e-05	0.000401447	yes	Serpine2	7.62196	8.32048	16.2535	18.0097
Wfdc2	chr2:164562715-164568506	3.39453	7.32574	1.10976	0.0092	0.0393677	yes	Wfdc2	3.56661	3.00152	5.53172	8.64297
Prkcz	chr4:155260119-155361391	2.14564	4.63872	1.11232	5e-05	0.000401447	yes	Prkcz	2.21075	1.94088	4.70163	4.27391
Zkscan2	chr7:123478638-123500449	1.29725	2.8077	1.11394	0.0001	0.000758012	yes	Zkscan2	1.34672	1.16335	2.48977	2.9429
Pde9a	chr17:31386233-31476309	4.52057	9.78428	1.11396	5e-05	0.000401447	yes	Pde9a	3.88334	4.86358	9.15353	9.77823
Gfpt2	chr11:49794154-49838620	0.727577	1.57579	1.11491	0.00665	0.0298809	yes	Gfpt2	0.661403	0.746397	1.16742	1.88161
Afap1l1	chr18:61730261-61786662	5.47803	11.8742	1.1161	5e-05	0.000401447	yes	Afap1l1	5.05619	5.54335	11.7264	11.2492
Tcp11l1	chr2:104679979-104712162	1.50035	3.25736	1.11841	0.00015	0.00109224	yes	Tcp11l1	1.34333	1.55971	2.73372	3.569
Dclk3	chr9:111439080-111489611	1.3715	2.98309	1.12106	0.00025	0.00173352	yes	Dclk3	1.52713	1.1266	3.29423	2.47781
Prkar1b	chr5:139017303-139130386	4.89726	10.6599	1.12214	5e-05	0.000401447	yes	Prkar1b	4.46801	5.00779	10.826	9.79998
Cgnl1	chr9:71626508-71771602	24.6129	53.7098	1.12577	5e-05	0.000401447	yes	Cgnl1	23.565	24.0589	53.3365	50.5875
Gm129	chr3:95871521-95891930	2.51231	5.5145	1.13421	0.00215	0.0114579	yes	Gm129	2.33914	2.52197	5.64368	5.02641
Gramd4	chr15:86057694-86137636	14.8813	32.6941	1.13553	5e-05	0.000401447	yes	Gramd4	14.1197	14.6744	31.6938	31.5666
Bach2	chr4:32417434-32586108	11.5802	25.4756	1.13746	5e-05	0.000401447	yes	Bach2	10.4808	11.9259	25.2298	24.0633
6030419C18Rik	chr9:58488602-58499742	1.53453	3.37978	1.13913	0.0013	0.00742405	yes	6030419C18Rik	1.11623	1.85296	4.07605	2.46354
Glul	chr1:153899944-153909714	27.6114	60.8421	1.13981	5e-05	0.000401447	yes	Glul	31.042	22.3837	61.7268	55.9976
Rnft2	chr5:118190735-118245025	2.27973	5.0373	1.14379	5e-05	0.000401447	yes	Rnft2	2.39492	2.01616	4.99884	4.74791
Arl4c	chr1:88698225-88702191	52.5657	116.256	1.14511	5e-05	0.000401447	yes	Arl4c	51.9889	49.7213	118.545	106.4
Duox1	chr2:122315671-122347972	0.650977	1.44826	1.15364	0.00115	0.00667996	yes	Duox1	0.648791	0.610796	1.32755	1.47471
Alcam	chr16:52248995-52452997	88.9722	198.359	1.15668	5e-05	0.000401447	yes	Alcam	85.401	86.7528	184.865	198.943
Sox4	chr13:28950729-28953682	79.389	177.15	1.15796	5e-05	0.000401447	yes	Sox4	73.0665	80.5446	175.707	167.063
Rhov	chr2:119269200-119271226	3.70595	8.27009	1.15806	5e-05	0.000401447	yes	Rhov	3.00808	4.16262	8.69727	7.30465
A730017C20Rik	chr18:59062380-59076960	15.0898	33.7611	1.16178	5e-05	0.000401447	yes	A730017C20Rik	14.7625	14.4351	29.698	35.6269
Coro2b	chr9:62419491-62537044	0.723745	1.6201	1.16253	0.00285	0.0145651	yes	Coro2b	0.443267	0.957119	1.59362	1.54114
Map4k1	chr7:28982853-29003278	2.17985	4.88123	1.16301	0.0001	0.000758012	yes	Map4k1	1.94158	2.27625	4.73047	4.71429
Pdgfa	chr5:138976971-138994953	192.025	430.883	1.166	5e-05	0.000401447	yes	Pdgfa	187.965	183.588	430.257	403.466
Fam187b	chr7:30973803-30989725	1.37348	3.08476	1.16733	0.01005	0.0422495	yes	Fam187b	1.09955	1.55801	3.03454	2.93421
Pde5a	chr3:122729157-122859374	3.25859	7.32223	1.16803	5e-05	0.000401447	yes	Pde5a	3.25965	3.04546	6.68125	7.48665
Tango6	chr8:106683067-106851439	4.62032	10.389	1.16899	5e-05	0.000401447	yes	Tango6	4.03899	4.90095	10.0919	10.01
Ccdc114	chr7:45928397-45948956	0.908174	2.0422	1.16909	0.00475	0.022486	yes	Ccdc114	1.03747	0.719772	1.43897	2.51252
Poc1b	chr10:99107170-99197988	6.74647	15.201	1.17196	5e-05	0.000401447	yes	Poc1b	7.01662	6.03722	14.5665	14.8462
Fgd2	chr17:29360913-29379535	3.14527	7.09289	1.17319	5e-05	0.000401447	yes	Fgd2	2.62236	3.46347	7.18428	6.53986
Enc1	chr13:97241104-97253040	7.32928	16.5566	1.17566	5e-05	0.000401447	yes	Enc1	6.15454	8.02701	14.4741	17.5616
L1cam	chrX:73853779-73880834	1.97883	4.47102	1.17596	5e-05	0.000401447	yes	L1cam	1.78929	2.03958	4.7346	3.91645
C530008M17Rik	chr5:76840598-76873554	0.521502	1.17891	1.17671	0.0005	0.00322686	yes	C530008M17Rik	0.445471	0.563592	1.15287	1.12822
Gfra2	chr14:70890129-70979838	0.721107	1.63066	1.17717	0.00355	0.0175686	yes	Gfra2	0.617514	0.777768	1.27656	1.87862
Mafa	chr15:75746842-75747922	2.3136	5.23206	1.17724	0.0033	0.0165054	yes	Mafa	2.58602	1.8906	5.78429	4.33931
Aen	chr7:78895926-78908833	10.2349	23.1484	1.17741	5e-05	0.000401447	yes	Aen	9.8638	9.93995	23.025	21.7651
Cadm4	chr7:24482022-24504533	3.74357	8.47087	1.17809	5e-05	0.000401447	yes	Cadm4	3.70511	3.53839	9.28128	7.10913
Sdk1	chr5:141241533-142213791	1.97338	4.47681	1.1818	5e-05	0.000401447	yes	Sdk1	1.84093	1.9774	4.41972	4.24253
Hoxc5	chr15:103014007-103017429	3.71994	8.45177	1.18397	5e-05	0.000401447	yes	Hoxc5	3.2728	3.92497	8.59419	7.75927
Dennd3	chr15:73512559-73572242	0.498945	1.13464	1.18528	0.0019	0.0102736	yes	Dennd3	0.429834	0.535583	0.87358	1.32185
2010107G23Rik	chr10:62107655-62111013	3.32646	7.56859	1.18604	5e-05	0.000401447	yes	2010107G23Rik	3.46129	2.97514	7.11997	7.52462
Ptprd	chr4:75941236-78211895	3.46582	7.89626	1.18797	5e-05	0.000401447	yes	Ptprd	2.97169	3.73438	7.28581	7.99279
Scamp5	chr9:57441326-57468024	1.75531	4.00085	1.18858	0.0001	0.000758012	yes	Scamp5	1.42955	1.96683	4.23274	3.50858
Tgm1	chr14:55700008-55713492	0.885636	2.0209	1.19021	0.0014	0.00791	yes	Tgm1	0.688055	1.02558	1.80253	2.10774
H2-T10	chr17:36115870-36121444	1.6039	3.66042	1.19042	0.0002	0.00141578	yes	H2-T10	0.778166	2.32525	3.31881	3.7638
Slc35d1	chr4:103171717-103214884	6.69286	15.2787	1.19083	5e-05	0.000401447	yes	Slc35d1	7.21215	5.73797	14.7543	14.8087
Syk	chr13:52583436-52648792	2.68646	6.15817	1.19679	5e-05	0.000401447	yes	Syk	2.82081	2.37726	6.32428	5.59126
Ttc28	chr5:110879802-111289779	3.83259	8.79228	1.19792	5e-05	0.000401447	yes	Ttc28	3.18781	4.22793	9.17173	7.84059
Sh2d3c	chr2:32721054-32755007	0.495582	1.13767	1.19888	0.0098	0.0413981	yes	Sh2d3c	0.623299	0.335611	1.4801	0.721188
Ror2	chr13:53109316-53286109	1.23704	2.84062	1.19932	0.0002	0.00141578	yes	Ror2	0.780464	1.6131	3.0543	2.44207
Basp1	chr15:25363276-25413764	41.9985	96.8577	1.20553	5e-05	0.000401447	yes	Basp1	42.0054	39.2581	93.354	94.0576
Sfxn4	chr19:60837276-60861430	0.686394	1.58371	1.2062	0.00535	0.0248919	yes	Sfxn4	0.793099	0.535015	1.28328	1.78106
Nbeal2	chr9:110624788-110654161	1.39954	3.23163	1.20731	5e-05	0.000401447	yes	Nbeal2	1.31717	1.39083	3.43408	2.81886
Pcyt1b	chrX:93654862-93749948	1.99009	4.60061	1.20899	5e-05	0.000401447	yes	Pcyt1b	1.7298	2.12085	4.39161	4.51018
Zfp462	chr4:54947944-55083563	6.92328	16.0065	1.20913	5e-05	0.000401447	yes	Zfp462	6.22218	7.17377	14.6145	16.3567
Zbtb10	chr3:9250566-9285332	1.59344	3.68501	1.20953	5e-05	0.000401447	yes	Zbtb10	1.43383	1.64933	3.64531	3.48487
Nrp2	chr1:62703316-62818692	65.165	150.892	1.21135	5e-05	0.000401447	yes	Nrp2	63.2956	62.7932	154.708	137.255
Tex15	chr8:33570543-33585585	0.902033	2.08893	1.21151	5e-05	0.000401447	yes	Tex15	0.988835	0.756524	2.05474	1.98715
Lrrc42	chr4:107233513-107253533	48.241	111.885	1.21369	5e-05	0.000401447	yes	Lrrc42	47.8053	45.537	108.629	107.859
B4galt5	chr2:167298444-167349178	0.647457	1.507	1.21882	0.0013	0.00742405	yes	B4galt5	0.504207	0.748567	1.3821	1.53381
Msi1	chr5:115429684-115454202	13.4696	31.3582	1.21913	5e-05	0.000401447	yes	Msi1	12.8883	13.1743	31.2466	29.4289
Asprv1	chr6:86628173-86629704	38.825	90.4957	1.22086	5e-05	0.000401447	yes	Asprv1	38.2993	36.8238	86.2803	88.8212
Ccdc149	chr5:52374650-52471543	0.803209	1.87466	1.22278	0.00135	0.00767726	yes	Ccdc149	0.914993	0.639149	2.17699	1.45032
Synm	chr7:67730160-67759742	0.572767	1.3373	1.22331	0.0001	0.000758012	yes	Synm	0.512851	0.595404	1.22685	1.36071
9230110C19Rik	chr9:8021671-8042823	7.77022	18.1509	1.22401	5e-05	0.000401447	yes	9230110C19Rik	8.18792	6.84681	16.6482	18.4722
Gata6	chr18:11052509-11085635	1.25825	2.94735	1.22801	0.0002	0.00141578	yes	Gata6	1.31612	1.11848	3.17142	2.53146
Fkbp1b	chr12:4833173-4841595	1.78798	4.19395	1.22998	0.00755	0.0333358	yes	Fkbp1b	1.45072	2.00887	3.24554	4.8694
Fkbp5	chr17:28399094-28486112	19.3181	45.3799	1.2321	5e-05	0.000401447	yes	Fkbp5	17.8555	19.5235	48.5977	39.2087
Khdrbs3	chr15:68928419-69093518	5.68065	13.3636	1.23418	5e-05	0.000401447	yes	Khdrbs3	5.49097	5.50062	14.1771	11.6804
Etv4	chr11:101769741-101785310	13.5833	31.995	1.23601	5e-05	0.000401447	yes	Etv4	13.4314	12.8512	26.537	35.3706
Mef2a	chr7:67233826-67372858	24.5826	57.9839	1.23802	5e-05	0.000401447	yes	Mef2a	22.6958	24.8695	51.2926	60.9015
Tmem125	chr4:118540940-118543726	1.19756	2.82599	1.23866	0.0032	0.0160711	yes	Tmem125	1.34783	0.969345	3.12413	2.34393
Pcdh7	chr5:57718020-58132240	2.00255	4.7292	1.23975	5e-05	0.000401447	yes	Pcdh7	1.89847	1.9763	3.77615	5.37445
Abhd2	chr7:79273265-79361601	9.8241	23.2249	1.24127	5e-05	0.000401447	yes	Abhd2	9.44693	9.56188	22.7523	22.1859
Dusp18	chr11:3895239-3901296	0.642071	1.52218	1.24533	0.0007	0.00433205	yes	Dusp18	0.626931	0.615422	1.3932	1.55209
Efha2	chr8:40308050-40386304	3.34406	7.92905	1.24555	5e-05	0.000401447	yes	Efha2	2.87027	3.60021	6.69297	8.64907
Rnf157	chr11:116336344-116413032	1.11972	2.66166	1.24919	0.0001	0.000758012	yes	Rnf157	0.982836	1.18373	2.75175	2.39835
Icam1	chr9:21015959-21028796	16.6028	39.5754	1.25318	5e-05	0.000401447	yes	Icam1	14.3566	17.7685	35.0967	41.4783
Ankrd35	chr3:96670130-96691034	0.663809	1.58396	1.25469	0.0011	0.00645094	yes	Ankrd35	0.436359	0.848056	1.62361	1.44121
Rhpn1	chr15:75704287-75714419	1.20399	2.87356	1.25501	0.00105	0.00619942	yes	Rhpn1	1.07901	1.25062	3.40598	2.15411
Ccdc116	chr16:17139063-17144423	0.554698	1.32393	1.25505	0.0025	0.0130496	yes	Ccdc116	0.48045	0.592845	1.13513	1.42656
Id2	chr12:25093798-25096092	16.5415	39.5756	1.25852	5e-05	0.000401447	yes	Id2	16.2752	15.7312	38.0255	38.5499
Nfkbie	chr17:45555715-45563168	0.954284	2.28631	1.26053	0.0019	0.0102736	yes	Nfkbie	0.751538	1.09492	2.5944	1.82941
Traf3	chr12:111166547-111267148	14.097	33.9213	1.26681	5e-05	0.000401447	yes	Traf3	13.4761	13.8005	33.2422	32.3928
Unc13b	chr4:43058983-43264887	4.18288	10.0682	1.26724	5e-05	0.000401447	yes	Unc13b	3.72534	4.36819	10.1137	9.36745
Msx2	chr13:53466880-53472780	7.16259	17.2641	1.26922	5e-05	0.000401447	yes	Msx2	6.57798	7.28102	17.1698	16.2348
Meis3	chr7:16175379-16186503	4.84282	11.7324	1.27658	5e-05	0.000401447	yes	Meis3	5.29711	4.07334	10.7527	11.9485
Hoxc4	chr15:103034394-103036852	8.82061	21.3784	1.27721	5e-05	0.000401447	yes	Hoxc4	8.01622	9.05092	19.1589	22.2065
Vsig10	chr5:117319265-117355006	1.13781	2.75844	1.2776	5e-05	0.000401447	yes	Vsig10	1.04726	1.1543	2.68249	2.65486
Rap1gap2	chr11:74383482-74590158	1.19232	2.89368	1.27914	5e-05	0.000401447	yes	Rap1gap2	1.07387	1.23316	2.85835	2.74068
Zfp82	chr7:30056033-30072823	3.61599	8.79791	1.28277	5e-05	0.000401447	yes	Zfp82	3.71507	3.28157	8.95021	8.07301
Sh3bp5	chr14:31373963-31436033	5.74686	13.9865	1.28319	5e-05	0.000401447	yes	Sh3bp5	5.25268	5.86701	14.2256	12.8371
Cyba	chr8:122424770-122432940	19.4859	47.4795	1.28487	5e-05	0.000401447	yes	Cyba	18.0167	19.6869	43.6954	48.1733
1700019G17Rik	chr6:85899049-85904938	0.901507	2.19915	1.28654	0.00125	0.00717207	yes	1700019G17Rik	1.02046	0.723885	2.0756	2.17957
Prkaa2	chr4:105029649-105109898	1.18955	2.91856	1.29484	5e-05	0.000401447	yes	Prkaa2	1.18334	1.11834	2.41525	3.23193
Gm14403	chr2:177498225-177512311	1.31405	3.22711	1.29622	5e-05	0.000401447	yes	Gm14403	1.1481	1.39448	3.25045	2.99374
Calm4	chr13:3837756-3838671	59.6191	146.514	1.29719	5e-05	0.000401447	yes	Calm4	60.0996	55.2584	137.74	145.752
Slc35f2	chr9:53771534-53818161	0.600859	1.47669	1.29726	0.0065	0.0292932	yes	Slc35f2	0.705656	0.456955	1.44633	1.41094
Tagln3	chr16:45711229-45724531	1.40482	3.4538	1.29779	0.00605	0.0275913	yes	Tagln3	1.44014	1.27807	3.29267	3.39013
Tfap2b	chr1:19208913-19238734	36.9349	90.8152	1.29795	5e-05	0.000401447	yes	Tfap2b	33.8798	37.5863	85.1955	90.5242
Calml3	chr13:3802892-3804318	24.0245	59.3181	1.30397	5e-05	0.000401447	yes	Calml3	23.6911	22.7943	59.9064	54.8691
Birc3	chr9:7848700-7873170	4.8052	11.9088	1.30936	5e-05	0.000401447	yes	Birc3	4.45474	4.84293	10.06	12.9825
Chrd	chr16:20724453-20742384	0.54285	1.34581	1.30985	0.0044	0.0210744	yes	Chrd	0.49094	0.559429	1.32382	1.28022
Ntng1	chr3:109780049-110143472	0.89746	2.22651	1.31086	0.00015	0.00109224	yes	Ntng1	0.87577	0.86074	2.20597	2.10214
N4bp2l1	chr5:150571642-150594525	2.80135	6.96451	1.3139	5e-05	0.000401447	yes	N4bp2l1	3.163	2.25738	7.29827	6.17747
Pnck	chrX:73655991-73660070	0.868078	2.1638	1.31767	0.00675	0.0302523	yes	Pnck	0.575808	1.10385	2.07233	2.11444
Atp6v0a4	chr6:38048482-38254009	1.76005	4.40932	1.32494	0.0054	0.0250863	yes	Atp6v0a4	1.64657	1.75897	4.15757	4.37409
Gpc1	chr1:92831685-92860196	54.1117	135.595	1.32529	5e-05	0.000401447	yes	Gpc1	49.9438	54.7579	133.263	129.102
Sstr1	chr12:58211803-58216036	0.527914	1.32381	1.32632	0.00235	0.0123725	yes	Sstr1	0.526843	0.494627	1.60581	0.955657
Gpr173	chrX:152344645-152368111	0.980924	2.46281	1.32809	0.00025	0.00173352	yes	Gpr173	1.05713	0.840875	2.25045	2.51488
Tll1	chr8:64014769-64205993	5.92528	14.8972	1.33009	5e-05	0.000401447	yes	Tll1	5.09608	6.36883	13.9891	14.8358
Map2	chr1:66175328-66442583	2.13436	5.36675	1.33025	5e-05	0.000401447	yes	Map2	1.87035	2.25945	5.45263	4.93158
P4ha2	chr11:54100923-54131667	8.59554	21.6204	1.33073	5e-05	0.000401447	yes	P4ha2	8.37839	8.25326	23.856	17.9776
Tekt5	chr16:10361253-10395448	1.91204	4.81276	1.33175	0.0013	0.00742405	yes	Tekt5	1.97774	1.72188	4.68055	4.63173
Tacstd2	chr6:67534058-67535822	21.3611	53.7835	1.33217	5e-05	0.000401447	yes	Tacstd2	19.334	21.998	49.8994	54.1671
Snx10	chr6:51523902-51590670	1.29879	3.27268	1.33331	0.0004	0.00264585	yes	Snx10	1.36144	1.15161	3.4534	2.87896
Bmpr1b	chr3:141837135-141982251	2.37001	5.9726	1.33347	5e-05	0.000401447	yes	Bmpr1b	1.83836	2.74741	5.08009	6.47639
B4galnt4	chr7:141061273-141072119	7.37242	18.6141	1.33618	5e-05	0.000401447	yes	B4galnt4	6.63525	7.62975	18.7637	17.2529
Pnmal2	chr7:16944681-16948828	1.37862	3.48203	1.3367	5e-05	0.000401447	yes	Pnmal2	1.17199	1.49552	3.70002	3.03741
Trib1	chr15:59648653-59657099	17.571	44.4915	1.34034	5e-05	0.000401447	yes	Trib1	13.735	20.2634	43.3019	42.7855
Prss23	chr7:89507784-89517586	3.92477	9.94679	1.34162	5e-05	0.000401447	yes	Prss23	3.43608	4.15802	8.06991	11.1763
Cdc14b	chr13:64192544-64274988	2.6758	6.78818	1.34305	5e-05	0.000401447	yes	Cdc14b	2.54747	2.62999	6.59445	6.54011
Adamts15	chr9:30899154-30922452	1.10346	2.79986	1.34332	5e-05	0.000401447	yes	Adamts15	1.14888	0.986219	2.65254	2.76495
Tspan6	chrX:133891069-133898429	10.888	27.6686	1.3455	5e-05	0.000401447	yes	Tspan6	10.5476	10.5199	27.9108	25.6256
Ctnnb1	chr9:120933399-120960507	577.613	1468.59	1.34626	5e-05	0.000401447	yes	Ctnnb1	553.642	563.991	1382.63	1458.97
Klhl13	chrX:23219270-23365053	4.76714	12.1408	1.34867	5e-05	0.000401447	yes	Klhl13	4.16198	5.06203	11.4324	12.0592
Dnahc8	chr17:30626935-30875264	0.675295	1.72195	1.35045	5e-05	0.000401447	yes	Dnahc8	0.606708	0.699931	1.76558	1.56625
Nup210	chr6:91013066-91116826	16.1935	41.3106	1.3511	5e-05	0.000401447	yes	Nup210	15.0638	16.2693	37.5774	42.3552
Galnt7	chr8:57523824-57663430	1.80611	4.61295	1.3528	5e-05	0.000401447	yes	Galnt7	1.58536	1.90932	4.75663	4.16903
Tsku	chr7:98350667-98361328	11.1948	28.6046	1.35342	5e-05	0.000401447	yes	Tsku	10.1007	11.5603	29.0416	26.306
Spred3	chr7:29158828-29168647	2.29249	5.86197	1.35447	5e-05	0.000401447	yes	Spred3	2.24609	2.18969	5.31518	6.02723
Id3	chr4:136143821-136145392	50.6022	129.702	1.35793	5e-05	0.000401447	yes	Id3	48.7541	49.1569	126.381	124.582
Ocln	chr13:100497366-100552498	0.94114	2.4138	1.35882	0.00035	0.00234563	yes	Ocln	1.0648	0.756225	2.47836	2.19214
Slc2a4	chr11:69942285-69948190	4.41409	11.3827	1.36665	5e-05	0.000401447	yes	Slc2a4	4.3725	4.16839	10.9823	11.0422
Fkbp11	chr15:98724367-98728198	11.3886	29.399	1.36818	5e-05	0.000401447	yes	Fkbp11	10.7697	11.2662	30.9346	25.9501
Sh2b2	chr5:136218148-136244903	1.62991	4.20818	1.36841	0.0001	0.000758012	yes	Sh2b2	1.95965	1.19408	4.29586	3.84661
Kcnip2	chr19:45792345-45816063	2.74662	7.09531	1.36921	5e-05	0.000401447	yes	Kcnip2	3.30977	2.00471	7.8881	5.84072
Foxp1	chr6:98925341-99435345	8.05206	20.8064	1.36959	5e-05	0.000401447	yes	Foxp1	7.18484	8.39522	18.4901	21.7684
Zfp750	chr11:121451948-121673151	15.9186	41.1382	1.36976	5e-05	0.000401447	yes	Zfp750	14.826	15.9752	38.2543	41.3445
Galnt4	chr10:99107170-99197988	2.51783	6.53738	1.37653	5e-05	0.000401447	yes	Galnt4	2.31564	2.55616	6.03031	6.61898
A330021E22Rik	chr5:5580981-5664232	0.577724	1.50051	1.37699	0.0025	0.0130496	yes	A330021E22Rik	0.523254	0.594595	1.51492	1.38843
Serpinb6b	chr13:32965512-32979037	0.622939	1.62398	1.38237	0.01075	0.04473	yes	Serpinb6b	0.45007	0.755264	1.40295	1.73931
Gadd45g	chr13:51846674-51848474	25.2521	66.1594	1.38954	5e-05	0.000401447	yes	Gadd45g	24.3825	24.4783	63.7269	64.286
Rgl1	chr1:152517529-152625111	2.96182	7.77432	1.39223	5e-05	0.000401447	yes	Rgl1	2.82665	2.90421	7.47396	7.56869
Ccnjl	chr11:43528748-43586999	1.4713	3.86372	1.3929	5e-05	0.000401447	yes	Ccnjl	1.29991	1.54693	3.88309	3.59289
4930452B06Rik	chr14:8431171-8666290	0.879615	2.31603	1.39671	0.00055	0.00349958	yes	4930452B06Rik	0.852558	0.849423	2.08691	2.39442
Krt27	chr11:99345565-99351094	0.723012	1.91915	1.40838	0.0105	0.0439444	yes	Krt27	0.800974	0.597994	1.4629	2.2505
Chn1	chr2:73596525-73775346	0.872506	2.31733	1.40923	0.0002	0.00141578	yes	Chn1	0.792135	0.896091	2.1906	2.29324
Krt7	chr15:101412402-101427806	7.43641	19.7615	1.41001	5e-05	0.000401447	yes	Krt7	6.61365	7.77517	19.9977	18.2391
Zfp105	chr9:122923077-122931028	0.944335	2.50966	1.41012	0.00175	0.00961594	yes	Zfp105	0.783278	1.04393	2.93305	1.92293
Pak6	chr2:118663576-118698020	3.91505	10.4048	1.41014	5e-05	0.000401447	yes	Pak6	3.28991	4.28538	8.77603	11.3563
Arhgap22	chr14:33216822-33369936	1.34387	3.57232	1.41047	0.0002	0.00141578	yes	Arhgap22	1.3591	1.24118	3.45852	3.45362
Vstm4	chr14:32856755-32939489	0.573653	1.5263	1.41179	0.0027	0.013915	yes	Vstm4	0.328922	0.781047	1.80953	1.14373
Dpf1	chr7:29304004-29317586	1.98932	5.29415	1.41212	5e-05	0.000401447	yes	Dpf1	1.68479	2.16437	6.05873	4.185
Fam124a	chr14:62555736-62608485	0.537608	1.43233	1.41374	0.0021	0.0112159	yes	Fam124a	0.500203	0.540023	1.51059	1.26085
Rasl11b	chr5:74195325-74199477	14.5602	38.9041	1.4179	5e-05	0.000401447	yes	Rasl11b	12.0999	16.0728	41.7358	33.5404
Slain1	chr14:103650242-103704799	0.458701	1.22721	1.41976	0.006	0.027435	yes	Slain1	0.461027	0.426521	1.17223	1.20232
2610318N02Rik	chr16:17113397-17125106	2.73799	7.32787	1.42028	0.00015	0.00109224	yes	2610318N02Rik	2.15106	3.14671	7.62982	6.54899
Ogdhl	chr14:32322018-32347820	5.65783	15.1517	1.42116	5e-05	0.000401447	yes	Ogdhl	5.76041	5.187	15.3514	13.9658
AI414108	chr9:27352684-27357543	0.914903	2.45372	1.42328	5e-05	0.000401447	yes	AI414108	0.813606	0.956655	2.35927	2.38848
Pla2g4f	chr2:120299956-120314165	0.540683	1.4502	1.4234	0.002	0.0107241	yes	Pla2g4f	0.458469	0.587707	2.00897	0.797047
Nupr1	chr7:126623245-126625470	2.33215	6.26316	1.42523	0.00775	0.0340832	yes	Nupr1	2.55312	1.95939	5.1279	6.99079
Bex2	chrX:136066564-136068236	8.68991	23.3805	1.4279	5e-05	0.000401447	yes	Bex2	7.44369	9.37056	22.5144	22.725
H19	chr7:142575531-142578146	144.883	390.873	1.43181	5e-05	0.000401447	yes	H19	142.547	137.789	378.921	377.386
Ppp1r36	chr12:76417598-76439491	1.37764	3.72914	1.43664	0.0019	0.0102736	yes	Ppp1r36	1.24853	1.41709	3.90081	3.31477
Chn2	chr6:54039931-54430221	0.562115	1.5252	1.44007	0.0012	0.00692753	yes	Chn2	0.596773	0.490873	1.40984	1.5413
Gm5424	chr2:31470269-31520670	44.9646	122.054	1.44066	5e-05	0.000401447	yes	Gm5424	45.9781	41.0246	112.506	123.659
Fmn2	chr1:174501824-174822729	1.83989	5.00894	1.44488	5e-05	0.000401447	yes	Fmn2	1.6905	1.86954	5.36673	4.32514
Crmp1	chr5:37242057-37292163	0.580325	1.58014	1.44512	0.00195	0.0105068	yes	Crmp1	0.665643	0.457238	1.795	1.26245
Fam211a	chr11:62604883-62648523	2.50043	6.87147	1.45845	5e-05	0.000401447	yes	Fam211a	2.3756	2.46251	6.73461	6.56111
Fabp5	chr3:10012584-10016610	213.772	588.144	1.46009	5e-05	0.000401447	yes	Fabp5	209.937	203.695	563.578	574.432
Gpc3	chrX:52272426-52619047	81.1834	223.569	1.46147	5e-05	0.000401447	yes	Gpc3	78.2309	78.8521	212.323	220.265
Zfp184	chr13:21945093-21960485	2.10513	5.80203	1.46265	5e-05	0.000401447	yes	Zfp184	1.83753	2.23572	5.76631	5.46015
Cited4	chr4:120666562-120667820	1.08343	2.989	1.46406	0.00435	0.0208595	yes	Cited4	0.928603	1.16774	3.09091	2.69256
Them6	chr15:74721233-74724373	0.895971	2.47281	1.46463	0.00435	0.0208595	yes	Them6	0.767758	0.965871	2.00252	2.78217
Tmem181c-ps	chr17:6610102-6620925	7.64468	21.1272	1.46657	5e-05	0.000401447	yes	Tmem181c-ps	8.15694	6.63487	20.0473	20.8319
Mylip	chr13:45389741-45411940	12.017	33.2624	1.46882	5e-05	0.000401447	yes	Mylip	11.5568	11.6951	31.5538	32.8062
Robo1	chr16:72663148-73046100	33.0043	91.9219	1.47775	5e-05	0.000401447	yes	Robo1	32.077	31.7836	90.596	87.2651
Metrnl	chr11:121702426-121717389	2.05244	5.71688	1.47789	5e-05	0.000401447	yes	Metrnl	2.02464	1.94666	5.8773	5.18437
Pkp4	chr2:59160849-59355205	34.6845	96.6461	1.47842	5e-05	0.000401447	yes	Pkp4	32.7812	34.3303	91.8192	95.1829
Osbpl3	chr6:50293326-50456170	4.37742	12.3138	1.49213	5e-05	0.000401447	yes	Osbpl3	4.41426	4.05568	13.0956	10.7307
Pde4b	chr4:102254741-102607262	4.94583	13.913	1.49215	5e-05	0.000401447	yes	Pde4b	4.62877	4.94099	13.7617	13.1589
Rasgrp4	chr7:29134932-29156210	0.679763	1.91523	1.49442	0.00135	0.00767726	yes	Rasgrp4	0.632409	0.682876	1.62442	2.08139
Tram1l1	chr3:124321036-124323260	0.817424	2.30325	1.49451	0.0015	0.00840496	yes	Tram1l1	0.78211	0.799536	2.30931	2.14729
Ptk2b	chr14:66153256-66281052	7.97664	22.4821	1.49492	5e-05	0.000401447	yes	Ptk2b	7.26167	8.17245	21.5739	21.9271
Tmeff1	chr4:48585192-48663131	8.5332	24.0515	1.49497	5e-05	0.000401447	yes	Tmeff1	8.1536	8.35742	21.8092	24.7285
Zfp534	chr4:147673502-147702553	0.403503	1.13816	1.49605	0.0053	0.0247347	yes	Zfp534	0.343085	0.43766	1.0093	1.19295
Mfsd2a	chr4:122946850-122961188	9.13133	25.8699	1.50238	5e-05	0.000401447	yes	Mfsd2a	7.85579	9.81256	25.3344	24.7218
Tro	chrX:150645302-150657436	0.474003	1.34313	1.50263	0.0002	0.00141578	yes	Tro	0.447787	0.469368	1.40598	1.19286
Serpinb10	chr1:107529002-107549271	1.73859	4.9381	1.50604	5e-05	0.000401447	yes	Serpinb10	1.4636	1.90043	3.21859	6.33623
Tspan5	chr3:138742194-138904424	18.5733	52.8431	1.50849	5e-05	0.000401447	yes	Tspan5	17.9116	18.0262	49.5314	52.7156
Gpc2	chr5:138273659-138279937	8.01142	22.8107	1.50958	5e-05	0.000401447	yes	Gpc2	8.95468	6.54675	21.0338	23.103
Crabp1	chr9:54764807-54773109	4.82247	13.767	1.51337	0.0001	0.000758012	yes	Crabp1	3.51024	5.82082	15.1757	11.4622
Jph4	chr14:55106825-55116935	0.366328	1.04729	1.51545	0.0011	0.00645094	yes	Jph4	0.412135	0.296678	1.0371	0.989315
Zdbf2	chr1:63273268-63314575	0.670529	1.9179	1.51615	5e-05	0.000401447	yes	Zdbf2	0.602368	0.695049	1.88208	1.82889
Ccdc92	chr5:124834431-124862221	5.62637	16.095	1.51633	5e-05	0.000401447	yes	Ccdc92	5.59386	5.2927	15.9182	15.2243
Nin	chr12:70011434-70111925	21.4818	61.4683	1.51673	5e-05	0.000401447	yes	Nin	20.8592	20.7062	56.3085	62.6274
Bik	chr15:83526861-83544635	1.32876	3.80332	1.51718	0.00615	0.0279846	yes	Bik	1.51929	1.05175	4.33694	3.02217
Tmod2	chr9:75565621-75611325	0.361485	1.03723	1.52073	5e-05	0.000401447	yes	Tmod2	0.331714	0.367729	0.960103	1.04685
Rgs9	chr11:109225354-109298181	1.72369	4.94763	1.52124	5e-05	0.000401447	yes	Rgs9	1.74706	1.58812	4.8183	4.75496
Greb1	chr12:16670614-16800886	2.98015	8.5997	1.5289	5e-05	0.000401447	yes	Greb1	2.43561	3.33074	8.57809	8.06161
Cxcl14	chr13:56288642-56296551	471.447	1360.48	1.52895	5e-05	0.000401447	yes	Cxcl14	437.609	474.6	1425.89	1206.52
Ypel1	chr16:17070310-17111252	3.03883	8.77231	1.52944	0.0041	0.0198636	yes	Ypel1	3.12781	2.75207	7.81164	9.16204
Shc2	chr10:79617937-79637918	1.19971	3.46852	1.53163	5e-05	0.000401447	yes	Shc2	1.18589	1.13545	3.71632	2.99498
Rassf9	chr10:102512221-102546560	13.3786	38.8861	1.53933	5e-05	0.000401447	yes	Rassf9	13.1045	12.782	39.3254	35.916
Eif4e3	chr6:99625136-99666771	4.4547	13.0139	1.54665	5e-05	0.000401447	yes	Eif4e3	4.33291	4.28656	11.9971	13.1838
Tspyl5	chr15:33683874-33687883	0.449861	1.31675	1.54944	0.00095	0.0057028	yes	Tspyl5	0.441461	0.428982	1.16648	1.38133
Marveld3	chr8:109947908-109962205	2.22688	6.53641	1.55347	5e-05	0.000401447	yes	Marveld3	2.29533	2.0135	5.5785	7.06891
Cyb5rl	chr4:107070167-107084805	3.79034	11.1613	1.55811	5e-05	0.000401447	yes	Cyb5rl	2.70475	4.62923	9.83551	11.7607
Gxylt2	chr6:100704733-100805081	2.005	5.9134	1.56038	5e-05	0.000401447	yes	Gxylt2	1.73394	2.14556	5.94316	5.49877
Galnt16	chr12:80518989-80603896	2.04934	6.04725	1.56112	5e-05	0.000401447	yes	Galnt16	1.67207	2.29323	6.5554	5.14551
Parm1	chr5:91517699-91623996	17.6423	52.0862	1.56186	5e-05	0.000401447	yes	Parm1	16.9925	17.1439	53.4287	47.3537
Sema3d	chr5:12383165-12588943	3.85995	11.4136	1.56411	5e-05	0.000401447	yes	Sema3d	3.28559	4.18309	9.54876	12.5357
Baiap2l2	chr15:79258194-79285509	0.410362	1.21847	1.5701	0.0108	0.0448921	yes	Baiap2l2	0.266618	0.527398	1.19858	1.15906
Etv5	chr16:22381312-22439570	9.86451	29.3432	1.57271	5e-05	0.000401447	yes	Etv5	9.11769	9.96932	26.4482	30.3284
Exoc6	chr19:37550417-37683249	1.34707	4.02712	1.57993	5e-05	0.000401447	yes	Exoc6	1.28778	1.31868	4.06056	3.73159
Plxna4	chr6:32144556-32588192	0.377928	1.13246	1.58328	5e-05	0.000401447	yes	Plxna4	0.273437	0.457822	1.09822	1.093
Atp8a1	chr5:67618140-67847431	1.59882	4.80548	1.58767	5e-05	0.000401447	yes	Atp8a1	1.59779	1.4958	4.61795	4.68026
Kalrn	chr16:33969072-34514027	2.23488	6.72986	1.59038	5e-05	0.000401447	yes	Kalrn	2.02253	2.30178	6.97589	6.04583
Maff	chr15:79347677-79359076	7.23038	21.94	1.60142	5e-05	0.000401447	yes	Maff	5.43973	8.55045	23.9822	18.4699
Iglon5	chr7:43472906-43490023	0.515681	1.5713	1.60741	0.00235	0.0123725	yes	Iglon5	0.388272	0.609527	1.75154	1.28878
Alox12e	chr11:70315612-70322518	13.2522	40.4596	1.61025	5e-05	0.000401447	yes	Alox12e	12.9281	12.7138	45.083	33.203
Exoc3l4	chr12:111417429-111431183	1.74511	5.35029	1.6163	5e-05	0.000401447	yes	Exoc3l4	1.78346	1.59318	5.27374	5.07863
Tjp1	chr7:65296164-65371244	21.1009	64.7051	1.61658	5e-05	0.000401447	yes	Tjp1	19.666	21.1624	62.1058	63.0932
Matk	chr10:81257544-81262981	0.498395	1.53562	1.62346	0.00915	0.0391675	yes	Matk	0.323877	0.640475	1.28148	1.68981
Adora2b	chr11:62248983-62266452	2.62582	8.09501	1.62426	5e-05	0.000401447	yes	Adora2b	2.52266	2.55808	8.81937	6.8438
Ccdc8	chr7:16994587-16996645	15.6387	48.2133	1.62431	5e-05	0.000401447	yes	Ccdc8	14.3693	15.8902	49.6977	43.5909
Slc22a23	chr13:34179157-34345182	1.35982	4.21063	1.63062	5e-05	0.000401447	yes	Slc22a23	1.38086	1.25028	4.31675	3.83047
Sncaip	chr18:52767810-52915931	4.59252	14.2968	1.63833	5e-05	0.000401447	yes	Sncaip	4.0325	4.85364	13.9082	13.7549
Fam19a5	chr15:87544298-87759364	1.27208	3.97331	1.64315	5e-05	0.000401447	yes	Fam19a5	1.14766	1.31371	3.93914	3.74887
Fam184a	chr10:53633144-53750909	0.688986	2.15723	1.64663	5e-05	0.000401447	yes	Fam184a	0.582833	0.750296	2.03083	2.14322
Rwdd2a	chr9:86571987-86574899	0.492617	1.54361	1.64777	0.0114	0.0469543	yes	Rwdd2a	0.330271	0.622902	1.69379	1.29297
Itga9	chr9:118606708-118901003	0.43045	1.3494	1.6484	5e-05	0.000401447	yes	Itga9	0.211124	0.621761	1.42379	1.18718
Arhgef16	chr4:154278469-154299895	4.64406	14.5788	1.65042	5e-05	0.000401447	yes	Arhgef16	4.71819	4.26767	15.2687	12.9401
Pdzrn3	chr6:101149606-101377897	15.1556	47.703	1.65423	5e-05	0.000401447	yes	Pdzrn3	13.8656	15.4592	52.2923	40.0091
Ace2	chrX:164139341-164188418	0.660704	2.0811	1.65527	5e-05	0.000401447	yes	Ace2	0.573694	0.704714	2.33531	1.69143
Fjx1	chr2:102449365-102451792	8.65848	27.2791	1.65561	5e-05	0.000401447	yes	Fjx1	8.05765	8.69578	26.5222	26.2606
Cygb	chr11:116645594-116654313	7.71308	24.3618	1.65924	5e-05	0.000401447	yes	Cygb	6.73118	8.19299	22.1651	24.973
Kcnmb4	chr10:116417867-116473523	17.7472	56.0691	1.65961	5e-05	0.000401447	yes	Kcnmb4	16.793	17.5464	56.688	51.801
Prom1	chr5:43993621-44101736	2.36162	7.48567	1.66435	5e-05	0.000401447	yes	Prom1	1.78495	2.78459	6.50264	7.98151
Zcchc18	chrX:136981115-137038302	0.607879	1.93166	1.66799	0.00595	0.027237	yes	Zcchc18	0.50951	0.666684	1.84206	1.89554
Ddx25	chr9:35541847-35558470	1.0219	3.24986	1.66912	0.0005	0.00322686	yes	Ddx25	1.00947	0.967822	3.75223	2.53598
Cdkn1c	chr7:143458338-143461050	12.0016	38.1828	1.6697	5e-05	0.000401447	yes	Cdkn1c	8.91526	14.3068	38.2785	35.602
Rgag1	chrX:143099602-143104335	1.61956	5.15669	1.67084	5e-05	0.000401447	yes	Rgag1	1.81765	1.31607	5.44275	4.53501
Cnn3	chr3:121426540-121458205	21.9316	69.8886	1.67205	5e-05	0.000401447	yes	Cnn3	21.9437	20.492	67.2481	67.9804
Grtp1	chr8:13176868-13200624	1.34295	4.2851	1.67392	0.0004	0.00264585	yes	Grtp1	1.4038	1.1947	4.30679	3.98452
Fads2	chr19:10064163-10101503	9.74412	31.2216	1.67994	5e-05	0.000401447	yes	Fads2	9.20245	9.6516	37.2785	23.1327
B4galt6	chr18:20684598-20746404	0.812206	2.60262	1.68005	5e-05	0.000401447	yes	B4galt6	0.661855	0.909696	2.70891	2.32695
Heg1	chr16:33684465-33768195	4.84771	15.5909	1.68533	5e-05	0.000401447	yes	Heg1	4.13759	5.24231	15.1117	15.0555
Akna	chr4:63367127-63403445	1.01872	3.29439	1.69325	5e-05	0.000401447	yes	Akna	1.039	0.932141	3.56819	2.80618
Rbm38	chr2:173021901-173034731	6.91814	22.3742	1.69338	5e-05	0.000401447	yes	Rbm38	6.68548	6.70054	21.8695	21.4226
Lbh	chr17:72918304-72941946	20.3489	65.9672	1.6968	5e-05	0.000401447	yes	Lbh	19.6624	19.7111	64.76	62.8809
Ston2	chr12:91633008-91786436	7.7807	25.2392	1.69769	5e-05	0.000401447	yes	Ston2	6.78889	8.26611	22.2803	26.5553
Bspry	chr4:62480066-62497298	1.87878	6.11564	1.70271	5e-05	0.000401447	yes	Bspry	2.36159	1.27368	6.13926	5.69399
Aph1c	chr9:66814993-66834706	0.409259	1.33887	1.70993	0.0001	0.000758012	yes	Aph1c	0.371957	0.419925	1.38569	1.2049
Notch3	chr17:32120892-32166852	4.68756	15.3639	1.71264	5e-05	0.000401447	yes	Notch3	4.2244	4.84562	15.8783	13.8496
Usp13	chr3:32817625-32935257	0.400441	1.31273	1.71291	0.0001	0.000758012	yes	Usp13	0.45051	0.324311	1.23486	1.30516
Nfkbia	chr12:55280813-55492647	59.2893	194.456	1.7136	5e-05	0.000401447	yes	Nfkbia	52.2122	62.5077	178.801	197.455
Cntn2	chr1:132509424-132542940	0.345286	1.13253	1.71368	5e-05	0.000401447	yes	Cntn2	0.335298	0.332802	1.30935	0.881993
5930412G12Rik	chr5:128579129-128600687	2.39622	7.86948	1.71551	5e-05	0.000401447	yes	5930412G12Rik	2.30853	2.32796	7.59376	7.63301
Lhpp	chr7:132610642-132706419	4.47354	14.7105	1.71735	5e-05	0.000401447	yes	Lhpp	4.28639	4.36954	14.5744	13.8891
Cntnap1	chr11:101176116-101190720	7.73485	25.4419	1.71776	5e-05	0.000401447	yes	Cntnap1	7.45019	7.51611	25.6003	23.6277
Atp10b	chr11:43149876-43262286	0.484297	1.5983	1.72258	5e-05	0.000401447	yes	Atp10b	0.352469	0.584605	1.56103	1.53155
Itpr1	chr6:108213095-108551116	0.559444	1.85081	1.72609	5e-05	0.000401447	yes	Itpr1	0.515846	0.566632	1.69692	1.88424
Magi3	chr3:104013264-104220406	3.59309	11.8962	1.7272	5e-05	0.000401447	yes	Magi3	3.03453	3.91779	11.7002	11.3178
Sfxn5	chr6:85213050-85333422	1.65047	5.47071	1.72885	5e-05	0.000401447	yes	Sfxn5	1.43463	1.75889	6.18925	4.39611
Doc2b	chr11:75769089-75796057	2.91341	9.66611	1.73023	5e-05	0.000401447	yes	Doc2b	2.8077	2.8295	9.37571	9.32739
8430408G22Rik	chr6:116633007-116673836	4.26297	14.1524	1.73112	5e-05	0.000401447	yes	8430408G22Rik	2.93969	5.30879	14.9876	12.3961
Spry4	chr18:38586264-38601268	1.61064	5.35266	1.73262	5e-05	0.000401447	yes	Spry4	1.16986	1.94659	5.95656	4.40039
Ddx58	chr4:40203776-40239825	1.7841	6.00075	1.74994	5e-05	0.000401447	yes	Ddx58	1.68745	1.76464	5.49764	6.1133
Zfp57	chr17:37001162-37010729	3.80543	12.8151	1.75172	5e-05	0.000401447	yes	Zfp57	3.73612	3.62706	12.4366	12.3595
Pvrl3	chr16:46394857-46496967	8.18145	27.6178	1.75517	5e-05	0.000401447	yes	Pvrl3	7.21001	8.62041	25.5903	27.8477
Bcl6	chr16:23965051-23988612	15.5179	52.3982	1.75558	5e-05	0.000401447	yes	Bcl6	15.8501	14.1758	53.8388	47.5473
Lmo2	chr2:103957994-103981878	0.513209	1.73326	1.75587	0.00465	0.0221156	yes	Lmo2	0.24999	0.743026	1.50519	1.84853
Gm1673	chr5:33983473-33985006	2.84438	9.65438	1.76307	0.00605	0.0275913	yes	Gm1673	3.47517	2.02847	10.9586	7.72185
Sept3	chr15:82274934-82294442	1.11649	3.79337	1.76451	5e-05	0.000401447	yes	2015-09-03	1.0966	1.06371	4.10908	3.23077
Mill1	chr7:18245346-18266092	4.74624	16.1551	1.76713	5e-05	0.000401447	yes	Mill1	4.34108	4.8425	16.607	14.6517
Fras1	chr5:96373954-96784728	10.5005	35.8427	1.77122	5e-05	0.000401447	yes	Fras1	10.3434	9.97426	36.808	32.5447
Tmem100	chr11:90030347-90036505	2.28637	7.83492	1.77686	5e-05	0.000401447	yes	Tmem100	2.59552	1.82841	5.48722	9.6727
Rbpms	chr8:33782643-33929841	2.81083	9.67808	1.78373	5e-05	0.000401447	yes	Rbpms	1.99592	3.4428	10.0797	8.64656
Slc4a11	chr2:130684107-130697519	11.2437	38.7231	1.78408	5e-05	0.000401447	yes	Slc4a11	10.8679	10.8876	41.9471	32.979
Mapk11	chr15:89142483-89149606	1.92188	6.64947	1.79072	5e-05	0.000401447	yes	Mapk11	1.74986	1.96882	6.58694	6.27923
Spry1	chr3:37639949-37644599	10.6055	36.7437	1.79268	5e-05	0.000401447	yes	Spry1	8.7149	11.8059	37.6842	33.4118
Spo11	chr2:172979841-172993576	4.71489	16.3367	1.79282	5e-05	0.000401447	yes	Spo11	5.03619	4.08673	14.2236	17.3866
Rgs2	chr1:143999337-144004149	9.60293	33.2855	1.79335	5e-05	0.000401447	yes	Rgs2	6.7992	11.7817	32.5202	31.8845
Tenm4	chr7:96210636-96908554	5.27538	18.3544	1.79878	5e-05	0.000401447	yes	Tenm4	4.38048	5.82694	18.2719	17.2424
Fgd5	chr6:91987109-92076005	4.38611	15.2725	1.79992	5e-05	0.000401447	yes	Fgd5	3.73306	4.7537	15.4652	14.0858
Tnfrsf21	chr17:43016554-43089188	6.58794	23.093	1.80956	5e-05	0.000401447	yes	Tnfrsf21	6.42221	6.3249	22.5248	22.1582
2610019F03Rik	chr8:13952007-13974777	3.23617	11.3516	1.81054	5e-05	0.000401447	yes	2610019F03Rik	2.87754	3.38418	9.39227	12.5722
Igsf9b	chr9:27299227-27334763	0.469283	1.65209	1.81576	5e-05	0.000401447	yes	Igsf9b	0.458225	0.449799	1.6398	1.55685
Ppm1j	chr3:104781055-104786017	0.554732	1.95608	1.8181	0.00365	0.0179688	yes	Ppm1j	0.54464	0.528721	2.17458	1.61027
Paqr8	chr1:20890621-20938756	0.685144	2.41635	1.81835	5e-05	0.000401447	yes	Paqr8	0.658131	0.667565	2.38741	2.28802
Soga2	chr17:66336981-66449750	2.49559	8.81943	1.82131	5e-05	0.000401447	yes	Soga2	2.17778	2.65097	8.78356	8.2813
Plk3	chr4:117126812-117133952	8.06956	28.7513	1.83306	5e-05	0.000401447	yes	Plk3	7.4298	8.18413	27.4514	28.1799
Ern1	chr11:106397619-106487796	3.50068	12.5475	1.8417	5e-05	0.000401447	yes	Ern1	3.38412	3.3894	12.1259	12.1525
D130040H23Rik	chr8:69271079-69303375	0.497459	1.78373	1.84225	0.00275	0.0141309	yes	D130040H23Rik	0.415127	0.547414	1.0451	2.40628
Whrn	chr4:63414909-63495991	4.57532	16.4313	1.8445	5e-05	0.000401447	yes	Whrn	4.18771	4.66515	16.9249	14.8683
Trim46	chr3:89234176-89245897	0.459512	1.65153	1.84563	0.00045	0.00294151	yes	Trim46	0.331746	0.557372	2.38658	0.808998
Ltb4r2	chr14:55761427-55763229	0.893243	3.21201	1.84635	0.00125	0.00717207	yes	Ltb4r2	0.797175	0.931174	3.44165	2.77332
Myo5b	chr18:74442618-74771477	0.350342	1.26658	1.8541	5e-05	0.000401447	yes	Myo5b	0.366705	0.311176	1.42638	1.02434
Dennd1c	chr17:57066054-57078510	0.284862	1.03121	1.856	0.0069	0.0308566	yes	Dennd1c	0.395837	0.155347	0.931666	1.06364
Sytl4	chrX:133936384-133981783	1.01057	3.66364	1.85811	5e-05	0.000401447	yes	Sytl4	0.977366	0.977999	3.85655	3.2323
Pstpip2	chr18:77794549-77882879	1.32714	4.82488	1.86218	5e-05	0.000401447	yes	Pstpip2	1.17217	1.39573	5.18915	4.1466
Elovl2	chr13:41182381-41220403	0.410239	1.49641	1.86696	5e-05	0.000401447	yes	Elovl2	0.369689	0.424089	1.56995	1.32547
H2-K1	chr17:33996011-34000333	9.7283	35.7379	1.8772	5e-05	0.000401447	yes	H2-K1	7.66164	11.1618	32.4554	36.6944
Nkd1	chr8:88521343-88594887	5.35246	19.7211	1.88147	5e-05	0.000401447	yes	Nkd1	4.43815	5.91841	18.4984	19.6602
Fkbp7	chr2:76663033-76673098	1.87639	7.0466	1.90897	0.00025	0.00173352	yes	Fkbp7	1.15139	2.47926	6.21887	7.41571
C430049B03Rik	chrX:53053111-53057190	0.273336	1.03065	1.9148	0.0025	0.0130496	yes	C430049B03Rik	0.269907	0.258976	0.902979	1.09124
Pfn2	chr3:57841894-57847757	32.1179	121.647	1.92126	5e-05	0.000401447	yes	Pfn2	33.1171	29.0283	126.317	109.061
Rnf180	chr13:105147493-105293014	1.22607	4.65032	1.92329	5e-05	0.000401447	yes	Rnf180	1.03123	1.34111	4.27189	4.72608
Wnt2b	chr3:104944804-104961709	1.06506	4.05566	1.92901	5e-05	0.000401447	yes	Wnt2b	1.12018	0.940613	3.86616	3.98119
1700058G18Rik	chr10:116417867-116473523	4.96529	18.9797	1.9345	5e-05	0.000401447	yes	1700058G18Rik	5.44539	4.16203	20.753	15.9711
Cxcl1	chr5:90891244-90893115	2.11926	8.12686	1.93914	0.00015	0.00109224	yes	Cxcl1	0.969257	3.13132	6.16503	9.55977
Tjp3	chr10:81268171-81291267	1.4911	5.78239	1.95529	0.00045	0.00294151	yes	Tjp3	1.47963	1.40553	5.42636	5.76209
Col26a1	chr5:136741763-136883107	1.37694	5.34336	1.95629	5e-05	0.000401447	yes	Col26a1	0.934735	1.72952	5.8698	4.46916
Pcdh19	chrX:133582860-133688993	1.72287	6.69298	1.95783	5e-05	0.000401447	yes	Pcdh19	1.71494	1.61868	6.04667	6.90369
Hoxc9	chr15:102977031-102984444	0.47059	1.82897	1.95849	0.00425	0.0204684	yes	Hoxc9	0.381492	0.529059	2.11716	1.42174
Gsdma	chr11:98664350-98677708	0.952556	3.7039	1.95917	5e-05	0.000401447	yes	Gsdma	1.09264	0.75048	2.96444	4.2023
Ednra	chr8:77663028-77724452	0.707296	2.75776	1.96311	5e-05	0.000401447	yes	Ednra	0.341496	1.02706	2.36777	2.96827
Sipa1l2	chr8:125418062-125492710	4.16558	16.2782	1.96636	5e-05	0.000401447	yes	Sipa1l2	3.6831	4.37693	16.4329	15.0641
Glipr2	chr4:43957701-43979118	0.900665	3.52045	1.9667	0.0001	0.000758012	yes	Glipr2	0.41133	1.33138	3.15592	3.65586
Vcam1	chr3:116110019-116129688	0.383395	1.50115	1.96917	0.00045	0.00294151	yes	Vcam1	0.288622	0.453216	1.2169	1.6877
Stxbp6	chr12:44852485-45074483	8.28231	32.524	1.9734	5e-05	0.000401447	yes	Stxbp6	8.11852	7.90706	32.7564	30.1748
Bbc3	chr7:16309582-16318334	2.51525	9.90407	1.97732	5e-05	0.000401447	yes	Bbc3	2.2925	2.5743	9.23782	9.92573
Figf	chrX:164373547-164402647	6.91259	27.2577	1.97936	5e-05	0.000401447	yes	Figf	7.17928	6.196	29.0629	23.6785
Entpd3	chr9:120539817-120568326	0.37074	1.46298	1.98043	0.00035	0.00234563	yes	Entpd3	0.438734	0.278617	0.946413	1.88433
Fam107b	chr2:3713457-3782134	11.0474	43.6605	1.98262	5e-05	0.000401447	yes	Fam107b	10.2646	11.1112	44.4397	40.0398
Fzd10	chr5:128601105-128604093	32.124	127.027	1.98341	5e-05	0.000401447	yes	Fzd10	30.7335	31.4238	113.646	132.142
Sox6	chr7:115471343-116038744	2.33604	9.26812	1.98821	5e-05	0.000401447	yes	Sox6	2.07775	2.44229	9.23665	8.69638
Slc12a5	chr2:164967987-164999731	0.654222	2.60683	1.99444	5e-05	0.000401447	yes	Slc12a5	0.608602	0.657263	2.50016	2.54383
Hif3a	chr7:17030992-17062427	7.38768	29.5098	1.998	5e-05	0.000401447	yes	Hif3a	6.70255	7.592	30.1013	26.9978
Mlec	chr5:115142980-115158176	90.4273	363.36	2.00657	5e-05	0.000401447	yes	Mlec	83.7259	91.2434	359.598	343.473
Rltpr	chr8:105690905-105701095	0.741529	2.9801	2.00678	0.0061	0.0277985	yes	Rltpr	0.652432	0.782365	3.2454	2.52084
Erg	chr16:95360203-95530365	0.270055	1.0932	2.01723	0.00805	0.0352123	yes	Erg	0.165456	0.357077	0.892522	1.22272
Gsta4	chr9:78191965-78209349	13.1651	53.3113	2.01772	5e-05	0.000401447	yes	Gsta4	13.2036	12.2698	52.5581	50.5947
Murc	chr4:48663513-48673492	0.292562	1.1863	2.01966	0.0075	0.033139	yes	Murc	0.225484	0.340599	1.1191	1.1763
Tmem35	chrX:134295224-134305969	0.617182	2.50381	2.02036	0.0009	0.00544281	yes	Tmem35	0.72494	0.469255	2.65949	2.18516
Mpp3	chr11:101999652-102026955	0.353546	1.43691	2.023	0.0017	0.00940045	yes	Mpp3	0.411048	0.273034	1.29606	1.48425
Zdhhc2	chr8:40423814-40484842	5.70997	23.226	2.02419	5e-05	0.000401447	yes	Zdhhc2	6.5774	4.47091	22.3841	22.5563
Ccr10	chr11:101172997-101175443	0.982658	4.01076	2.02911	0.00015	0.00109224	yes	Ccr10	1.14009	0.761271	3.98374	3.77675
9930013L23Rik	chr7:83932856-84086505	0.521041	2.13536	2.03501	5e-05	0.000401447	yes	9930013L23Rik	0.427598	0.580573	1.92339	2.20836
Acaa1b	chr9:119148042-119157093	1.0191	4.22774	2.05259	0.00015	0.00109224	yes	Acaa1b	1.1824	0.789477	4.55706	3.62326
Proser2	chr2:6098499-6130185	1.46563	6.13748	2.06612	5e-05	0.000401447	yes	Proser2	1.31594	1.51994	6.13851	5.737
Abcc4	chr14:118482691-118706219	3.18051	13.3821	2.07297	5e-05	0.000401447	yes	Abcc4	3.13186	3.02217	13.4581	12.4351
Il2rg	chrX:101264386-101268206	2.72187	11.4757	2.07591	5e-05	0.000401447	yes	Il2rg	2.04804	3.21856	9.78804	12.4164
Fut2	chr7:45648590-45666394	0.368287	1.56477	2.08705	0.0003	0.00205109	yes	Fut2	0.351685	0.36092	1.86508	1.16262
Zfp566	chr7:30077336-30090510	5.03258	21.4934	2.09452	5e-05	0.000401447	yes	Zfp566	5.49049	4.24713	20.9467	20.6412
Foxi3	chr6:70956605-70961066	24.7507	105.944	2.09776	5e-05	0.000401447	yes	Foxi3	21.3638	26.5267	101.115	103.877
Syt7	chr19:10389089-10453181	3.21013	13.7691	2.10073	5e-05	0.000401447	yes	Syt7	2.83172	3.37961	14.8071	11.835
Aif1	chr17:35170991-35176001	0.821965	3.53185	2.10327	0.00685	0.0306554	yes	Aif1	0.950749	0.639684	2.69613	4.13769
Col11a1	chr3:114030539-114220326	0.560598	2.41787	2.1087	5e-05	0.000401447	yes	Col11a1	0.465685	0.619025	2.66528	2.0131
Snai3	chr8:122454205-122460692	1.07612	4.66558	2.11622	0.0001	0.000758012	yes	Snai3	1.2486	0.833598	4.68413	4.34336
Gsg1l	chr7:125878418-126082411	0.549111	2.38809	2.12069	5e-05	0.000401447	yes	Gsg1l	0.428859	0.633625	2.58042	2.04032
Prnd	chr2:131950860-131956130	0.319465	1.39774	2.12936	0.0009	0.00544281	yes	Prnd	0.309793	0.308345	1.04229	1.66221
Thsd4	chr9:59966930-60511035	2.47967	10.8577	2.1305	5e-05	0.000401447	yes	Thsd4	2.15768	2.64028	11.3252	9.68348
Phc1	chr6:122317730-122340227	6.32924	27.7788	2.13388	5e-05	0.000401447	yes	Phc1	5.81563	6.43092	27.4129	26.3367
C130021I20Rik	chr2:33641192-33645663	4.34236	19.0694	2.13471	5e-05	0.000401447	yes	C130021I20Rik	4.1608	4.2413	19.8052	17.0924
Ptch2	chr4:117096355-117114831	87.5983	384.914	2.13556	5e-05	0.000401447	yes	Ptch2	85.486	84.0093	373.078	371.697
Svopl	chr6:37983738-38046996	0.253037	1.11205	2.13581	0.0063	0.0285606	yes	Svopl	0.115541	0.374064	1.08027	1.07145
Bmp4	chr14:46379523-46390599	7.42829	32.6607	2.13645	5e-05	0.000401447	yes	Bmp4	7.87549	6.49762	34.8389	28.3569
Rarb	chr14:16430839-16575210	0.486332	2.14962	2.14407	0.0001	0.000758012	yes	Rarb	0.520034	0.420978	2.06854	2.0908
Nfe2l3	chr6:51432669-51458768	2.83102	12.5211	2.14496	5e-05	0.000401447	yes	Nfe2l3	2.70849	2.7693	11.6487	12.5785
Pnpla3	chr15:84167815-84189521	0.811386	3.58953	2.14534	5e-05	0.000401447	yes	Pnpla3	0.813816	0.756147	3.91883	3.02662
Zdhhc14	chr17:5492599-5753891	0.991145	4.39777	2.1496	5e-05	0.000401447	yes	Zdhhc14	0.862539	1.05524	4.31065	4.19866
Sh3rf2	chr18:42053709-42158695	4.78124	21.3364	2.15786	5e-05	0.000401447	yes	Sh3rf2	4.15239	5.0989	19.982	21.3021
Aspg	chr12:112106682-112127573	0.657401	2.96557	2.17346	5e-05	0.000401447	yes	Aspg	0.594593	0.677423	2.63683	3.10129
Golga7b	chr19:42247577-42270348	8.84867	40.0493	2.17824	5e-05	0.000401447	yes	Golga7b	9.02884	8.09259	39.1169	38.3751
Aif1l	chr2:31950302-31973442	1.75333	7.93679	2.17846	5e-05	0.000401447	yes	Aif1l	1.52095	1.8716	8.00605	7.35098
Dusp6	chr10:99263230-99267489	59.0196	267.338	2.1794	5e-05	0.000401447	yes	Dusp6	40.821	73.377	251.653	265.623
Hs6st2	chrX:51387211-51681602	0.292024	1.32323	2.1799	0.00045	0.00294151	yes	Hs6st2	0.308682	0.25636	1.28015	1.28018
Gdf10	chr14:33923586-33935282	0.453634	2.05944	2.18265	0.00025	0.00173352	yes	Gdf10	0.253183	0.624561	2.22402	1.76083
Ckb	chr12:111669354-111672338	15.8612	72.0867	2.18424	5e-05	0.000401447	yes	Ckb	15.5361	15.1539	80.5004	58.9814
Rnf182	chr13:43615796-43670944	0.554076	2.51822	2.18425	5e-05	0.000401447	yes	Rnf182	0.515532	0.556559	2.36316	2.50939
Actn3	chr19:4861215-4877909	0.230537	1.04803	2.18461	0.0045	0.0214691	yes	Actn3	0.311553	0.134517	1.37786	0.649984
Abcc8	chr7:46104522-46180033	0.421454	1.93049	2.19552	5e-05	0.000401447	yes	Abcc8	0.336855	0.478622	2.25611	1.47923
Plcb4	chr2:135741829-136013068	0.718943	3.29603	2.19678	5e-05	0.000401447	yes	Plcb4	0.793788	0.597306	3.45047	2.92707
Kcnh2	chr5:24319588-24351604	1.90486	8.74154	2.1982	5e-05	0.000401447	yes	Kcnh2	1.65273	2.03301	8.73171	8.18244
Tenm3	chr8:48225664-48674690	7.19522	33.0856	2.20109	5e-05	0.000401447	yes	Tenm3	6.49207	7.43008	33.1713	30.8466
4930550C14Rik	chr9:53405285-53432803	0.636984	2.93496	2.20401	0.0027	0.013915	yes	4930550C14Rik	0.552248	0.680262	2.38474	3.29415
Card10	chr15:78775135-78803042	7.52293	35.0952	2.22191	5e-05	0.000401447	yes	Card10	6.8443	7.71194	35.6421	32.2642
Slc38a1	chr15:96571417-96642913	2.69916	12.6568	2.22933	5e-05	0.000401447	yes	Slc38a1	2.12447	3.09818	12.8321	11.6578
Gata2	chr6:88198663-88207032	0.255709	1.20021	2.23071	0.00135	0.00767726	yes	Gata2	0.137788	0.356988	0.980881	1.34142
Galnt14	chr17:73493750-73710451	1.95967	9.2002	2.23105	5e-05	0.000401447	yes	Galnt14	1.80455	1.98725	9.73354	8.06808
Adamts20	chr15:94270162-94404350	0.411865	1.94206	2.23734	5e-05	0.000401447	yes	Adamts20	0.319993	0.476932	1.83388	1.92385
Sox21	chr14:118233233-118237030	12.247	57.7865	2.23831	5e-05	0.000401447	yes	Sox21	11.2127	12.4842	53.8649	57.9471
St6gal1	chr16:23224739-23360350	4.22686	19.9732	2.2404	5e-05	0.000401447	yes	St6gal1	3.36299	4.81563	18.2148	20.4315
Sema5b	chr16:35541361-35664258	0.610824	2.90056	2.2475	5e-05	0.000401447	yes	Sema5b	0.618444	0.56345	3.12638	2.48597
Tnik	chr3:28263213-28670585	3.7019	17.605	2.24965	5e-05	0.000401447	yes	Tnik	3.37284	3.79002	17.5185	16.5457
Bex4	chrX:136139044-136140437	5.03266	24.0063	2.25402	5e-05	0.000401447	yes	Bex4	5.32806	4.40971	24.8024	21.6477
Rtn1	chr12:72211751-72408939	0.469945	2.24373	2.25534	0.00185	0.0100478	yes	Rtn1	0.368078	0.541226	2.32166	2.01977
Kcnk1	chr8:125995101-126030688	2.84056	13.5697	2.25614	5e-05	0.000401447	yes	Kcnk1	2.89012	2.60612	12.5572	13.699
Zcchc5	chrX:106837081-106840643	0.476915	2.27962	2.25699	5e-05	0.000401447	yes	Zcchc5	0.396299	0.526492	1.97294	2.43794
Lrp4	chr2:91457530-91513901	34.2568	164.399	2.26274	5e-05	0.000401447	yes	Lrp4	31.5733	34.7106	154.138	163.961
Ica1l	chr1:59989067-60043087	0.235479	1.14383	2.2802	0.0009	0.00544281	yes	Ica1l	0.219093	0.236539	1.15525	1.05797
Kcnq4	chr4:120697472-120747176	2.50742	12.208	2.28355	5e-05	0.000401447	yes	Kcnq4	2.23962	2.61202	12.0022	11.6192
Serpina3j	chr12:104314569-104320586	0.323593	1.57753	2.28542	0.00405	0.0196839	yes	Serpina3j	0.277203	0.348922	1.44559	1.6068
Anks6	chr4:47015688-47057306	0.43072	2.10083	2.28614	5e-05	0.000401447	yes	Anks6	0.400752	0.432655	2.32326	1.74167
Smtnl2	chr11:72390113-72411713	2.59094	12.6921	2.29239	5e-05	0.000401447	yes	Smtnl2	2.48262	2.53062	12.0886	12.4696
Cyp4f39	chr17:32452722-32493320	0.712821	3.50469	2.29768	5e-05	0.000401447	yes	Cyp4f39	0.483911	0.895339	3.35579	3.4255
Scube3	chr17:28142525-28171345	7.44662	36.8587	2.30735	5e-05	0.000401447	yes	Scube3	6.80405	7.60454	36.8259	34.4927
Cux2	chr5:121860215-122047825	0.424072	2.10313	2.31016	5e-05	0.000401447	yes	Cux2	0.394517	0.426026	2.07176	1.99762
Pkp2	chr16:16213344-16272712	0.351682	1.74612	2.31181	0.00065	0.00404312	yes	Pkp2	0.311096	0.369379	2.08054	1.29806
Tubb2b	chr13:34127007-34130354	8.15716	40.5686	2.31422	5e-05	0.000401447	yes	Tubb2b	6.99184	8.79159	37.4084	41.0884
Tnfrsf19	chr14:60963833-61046855	35.2729	175.947	2.31851	5e-05	0.000401447	yes	Tnfrsf19	30.0229	38.2272	171.21	169.232
Kctd12	chr14:102976580-102982637	12.0572	60.1589	2.31889	5e-05	0.000401447	yes	Kctd12	10.229	13.1006	60.7609	55.6416
Lgi2	chr5:52537863-52566280	1.59949	8.00368	2.32305	5e-05	0.000401447	yes	Lgi2	1.53866	1.55623	7.62651	7.85994
Pdpn	chr4:143267421-143299507	2.28356	11.4362	2.32425	5e-05	0.000401447	yes	Pdpn	2.48184	1.93665	11.5671	10.561
Drp2	chrX:134404779-134456573	0.508132	2.55379	2.32936	5e-05	0.000401447	yes	Drp2	0.485615	0.497579	2.71224	2.22913
Ly6g6e	chr17:35076941-35078804	3.64532	18.3357	2.33054	5e-05	0.000401447	yes	Ly6g6e	3.30482	3.74858	19.4375	16.0405
Ltb4r1	chr14:55765961-55768492	0.521285	2.62503	2.33219	0.0014	0.00791	yes	Ltb4r1	0.413795	0.594848	2.67984	2.39937
Cacna1b	chr2:24606374-24763152	0.270107	1.36992	2.34249	5e-05	0.000401447	yes	Cacna1b	0.284633	0.238002	1.30754	1.34315
Mgarp	chr3:51388412-51396547	0.638283	3.24941	2.34791	0.0017	0.00940045	yes	Mgarp	0.63527	0.599754	3.25049	3.03685
Epb4.1l2	chr10:25359797-25523518	8.78154	44.7377	2.34895	5e-05	0.000401447	yes	Epb4.1l2	8.1054	8.88615	42.6431	43.9206
Derl3	chr10:75893397-75895941	0.583419	2.98303	2.35417	0.0021	0.0112159	yes	Derl3	0.505752	0.623115	3.50953	2.26238
Pde4d	chr13:108654176-109955969	3.17689	16.3475	2.36338	5e-05	0.000401447	yes	Pde4d	2.91044	3.23659	16.0909	15.5401
Kcnn1	chr8:70842048-70857008	0.636026	3.29223	2.37191	5e-05	0.000401447	yes	Kcnn1	0.56902	0.661637	3.5169	2.85329
Ecscr	chr18:35713088-35721491	0.632491	3.32442	2.39399	0.0026	0.0135023	yes	Ecscr	0.357388	0.866429	2.70124	3.73124
Man1a	chr10:53906032-54075796	6.7272	35.4842	2.3991	5e-05	0.000401447	yes	Man1a	6.74388	6.27269	33.1725	35.4864
Wnt3	chr11:103774174-103818021	8.33675	44.0995	2.40321	5e-05	0.000401447	yes	Wnt3	7.13032	9.0006	39.9433	45.3856
Daam2	chr17:49456021-49564337	1.32593	7.08594	2.41796	5e-05	0.000401447	yes	Daam2	0.866182	1.69938	7.93947	5.77123
Kcnh3	chr15:99224975-99262041	1.71909	9.21444	2.42225	5e-05	0.000401447	yes	Kcnh3	1.63813	1.68816	9.71746	8.11171
Csf1	chr3:107741047-107760469	1.36328	7.33494	2.42771	5e-05	0.000401447	yes	Csf1	1.11224	1.52559	7.13594	7.05656
Rhpn2	chr7:35334236-35396767	0.983787	5.30981	2.43224	5e-05	0.000401447	yes	Rhpn2	1.03641	0.867135	4.77878	5.49525
Rspo1	chr4:124986429-125009099	0.521112	2.82769	2.43996	0.0005	0.00322686	yes	Rspo1	0.406037	0.602271	3.17643	2.2949
Adamtsl2	chr2:27079380-27108613	0.300799	1.63521	2.4426	0.0003	0.00205109	yes	Adamtsl2	0.165399	0.416621	1.48667	1.67732
Slc2a13	chr15:91267690-91573261	0.479743	2.61576	2.4469	5e-05	0.000401447	yes	Slc2a13	0.439368	0.488894	2.46944	2.59184
Plekhh1	chr12:79029162-79089670	0.29901	1.63582	2.45175	0.00075	0.00461806	yes	Plekhh1	0.257079	0.32148	1.70709	1.45808
Cacna2d1	chr5:15934690-16374511	0.455269	2.51038	2.46311	5e-05	0.000401447	yes	Cacna2d1	0.387176	0.493731	2.4523	2.40507
Padi4	chr4:140745507-140774203	0.659002	3.63401	2.46321	5e-05	0.000401447	yes	Padi4	0.239809	1.0353	2.62384	4.40767
Serpina3i	chr12:104263121-104269365	2.30209	12.8286	2.47835	5e-05	0.000401447	yes	Serpina3i	1.83882	2.61552	14.0673	10.7549
Abi3bp	chr16:56477845-56690135	3.79627	21.3571	2.49206	5e-05	0.000401447	yes	Abi3bp	3.48467	3.8608	21.2977	20.0265
Cldn7	chr11:69964778-69967886	0.908762	5.11887	2.49385	0.00015	0.00109224	yes	Cldn7	0.723868	1.03451	4.63836	5.26622
Fsd1	chr17:55986510-55996881	0.89418	5.11806	2.51696	5e-05	0.000401447	yes	Fsd1	0.74905	0.981112	5.71576	4.18725
Ccdc109b	chr3:129914959-129970206	1.17016	6.70947	2.51949	5e-05	0.000401447	yes	Ccdc109b	1.3941	0.870072	7.36593	5.61633
Wnt7a	chr6:91363982-91411369	1.47469	8.47106	2.52213	5e-05	0.000401447	yes	Wnt7a	1.2113	1.6421	7.86954	8.52125
Susd4	chr1:182764905-182895654	4.87046	28.6484	2.55633	5e-05	0.000401447	yes	Susd4	4.48602	4.93791	28.4051	27.0272
Mycl1	chr4:122996098-123002480	10.3561	60.9692	2.5576	5e-05	0.000401447	yes	Mycl1	10.0851	9.95302	60.2381	57.7321
Sel1l3	chr5:53107082-53213452	1.24929	7.40771	2.56792	5e-05	0.000401447	yes	Sel1l3	0.878479	1.53879	7.41077	6.92253
Relb	chr7:19606221-19629438	4.13347	24.6715	2.57742	5e-05	0.000401447	yes	Relb	3.99821	3.99971	24.1288	23.6085
Grhl3	chr4:135541887-135573620	4.64354	27.7581	2.57961	5e-05	0.000401447	yes	Grhl3	5.02821	3.95665	26.5247	27.1849
Fam13a	chr6:58933535-59024502	9.32329	55.8618	2.58295	5e-05	0.000401447	yes	Fam13a	9.2503	8.78949	53.7385	54.3494
Darc	chr1:173331885-173333503	0.504506	3.05927	2.60025	0.003	0.015236	yes	Darc	0.425693	0.550484	3.40112	2.51832
Syt5	chr7:4539764-4546567	0.943944	5.78894	2.61653	5e-05	0.000401447	yes	Syt5	0.961853	0.8646	5.99688	5.20423
Mme	chr3:63295871-63382231	5.53573	34.186	2.62656	5e-05	0.000401447	yes	Mme	5.80969	4.90147	37.1895	28.9576
E130008D07Rik	chr17:43146040-43158291	0.494546	3.06466	2.63155	5e-05	0.000401447	yes	E130008D07Rik	0.600037	0.356869	2.61023	3.31963
Sult4a1	chr15:84076096-84105754	0.349865	2.17149	2.63381	0.0004	0.00264585	yes	Sult4a1	0.305754	0.371206	2.47386	1.72779
Ncf1	chr5:134220259-134229625	0.199481	1.24459	2.64135	0.00315	0.0158592	yes	Ncf1	0.0995245	0.286455	0.96622	1.44195
Plgrkt	chr19:29348676-29361871	19.8825	124.708	2.64898	5e-05	0.000401447	yes	Plgrkt	18.7863	19.6847	112.641	128.659
Rnf32	chr5:29198005-29225291	2.21929	14.0409	2.66146	5e-05	0.000401447	yes	Rnf32	1.97394	2.32021	13.2727	13.8952
Nr2e3	chr9:59942770-59950079	0.198554	1.25687	2.66224	0.0087	0.0375176	yes	Nr2e3	0.184802	0.199384	1.1465	1.28544
Mpped2	chr2:106693458-106868360	0.569097	3.61008	2.66529	5e-05	0.000401447	yes	Mpped2	0.441445	0.659709	3.9742	3.01101
Thsd7b	chr1:129273303-130219278	0.445341	2.82921	2.66742	5e-05	0.000401447	yes	Thsd7b	0.334645	0.527052	2.85684	2.61744
Klk13	chr7:43712566-43726758	0.514678	3.2718	2.66834	0.00515	0.0241547	yes	Klk13	0.681318	0.314542	2.94303	3.38763
Olfm1	chr2:28193092-28230736	3.20466	20.6806	2.69004	5e-05	0.000401447	yes	Olfm1	3.48378	2.71696	22.3179	17.6974
Ptges	chr2:30889470-30903297	2.67752	17.3105	2.69268	5e-05	0.000401447	yes	Ptges	1.9979	3.18287	16.9758	16.5185
Fn1	chr1:71585472-71653234	50.1117	325.185	2.69804	5e-05	0.000401447	yes	Fn1	43.5529	53.409	328.388	300.817
Edar	chr10:58600787-58675696	25.6516	168.71	2.71742	5e-05	0.000401447	yes	Edar	23.6535	25.9801	155.67	170.769
Galnt12	chr4:47091952-47123042	2.31737	15.3585	2.72847	5e-05	0.000401447	yes	Galnt12	1.94222	2.5417	15.2027	14.5147
5830473C10Rik	chr5:90561208-90597906	0.180484	1.19791	2.73058	0.00945	0.0401839	yes	5830473C10Rik	0.0408274	0.308394	0.969027	1.34883
Prr5l	chr2:101714284-101838980	0.263257	1.74919	2.73214	5e-05	0.000401447	yes	Prr5l	0.287582	0.221797	1.60945	1.77508
Cadm3	chr1:173334253-173367695	0.986287	6.60309	2.74306	5e-05	0.000401447	yes	Cadm3	0.807312	1.10107	6.46132	6.3151
Sfrp5	chr19:42197970-42202252	0.291518	2.00469	2.78172	0.00265	0.0137036	yes	Sfrp5	0.195317	0.368746	2.26553	1.61338
Hs3st3a1	chr11:64433134-64522835	0.447282	3.13296	2.80827	5e-05	0.000401447	yes	Hs3st3a1	0.427836	0.437618	2.69569	3.36633
Arg1	chr10:24915206-24927470	0.27718	1.94357	2.80982	0.00625	0.0283761	yes	Arg1	0.258057	0.278264	1.74074	2.01991
Galnt6	chr15:100689914-100729376	0.96707	6.81029	2.81602	5e-05	0.000401447	yes	Galnt6	0.644785	1.22641	6.88348	6.29386
Nptx2	chr5:144545886-144557478	4.67631	32.956	2.8171	5e-05	0.000401447	yes	Nptx2	4.86812	4.18016	32.5056	31.2614
Ngf	chr3:102469927-102521013	1.36646	9.71051	2.82911	5e-05	0.000401447	yes	Ngf	1.32174	1.32223	8.25789	10.5311
Coch	chr12:51593340-51605773	0.271995	1.96421	2.8523	0.00015	0.00109224	yes	Coch	0.32902	0.197268	2.14793	1.65265
Hspa2	chr12:76404175-76406936	2.7695	20.2876	2.8729	5e-05	0.000401447	yes	Hspa2	2.46092	2.89783	21.4961	17.7587
Dnajc6	chr4:101496647-101642799	1.08786	7.99553	2.8777	5e-05	0.000401447	yes	Dnajc6	0.857085	1.24784	7.15969	8.31099
2010300C02Rik	chr1:37611675-37719811	8.27356	61.3837	2.89128	5e-05	0.000401447	yes	2010300C02Rik	7.36134	8.6473	58.9752	59.7971
Ifitm3	chr7:141009589-141010744	40.1494	304.771	2.92427	5e-05	0.000401447	yes	Ifitm3	34.8284	42.8574	279.635	310.071
Dcn	chr10:97479499-97518162	50.0129	383.434	2.93861	5e-05	0.000401447	yes	Dcn	39.8258	56.945	322.366	419.547
Nap1l5	chr6:58833699-58920396	0.60838	4.67323	2.94137	0.00115	0.00667996	yes	Nap1l5	0.489983	0.687181	4.44102	4.60128
Grb10	chr11:11930498-12037420	7.60167	60.8617	3.00115	5e-05	0.000401447	yes	Grb10	6.70498	8.00361	59.7417	58.0206
Bdkrb2	chr12:105563171-105593071	0.297969	2.39562	3.00717	0.00235	0.0123725	yes	Bdkrb2	0.335384	0.241161	2.59379	2.04155
H2-Ab1	chr17:34263226-34269418	3.40499	27.5623	3.01697	5e-05	0.000401447	yes	H2-Ab1	4.19493	2.39344	36.5867	16.7439
Sh3gl3	chr7:82260128-82307417	0.933138	7.89024	3.07991	5e-05	0.000401447	yes	Sh3gl3	1.0083	0.797249	6.96509	8.30187
Alox12	chr11:70241454-70255341	0.324987	2.75355	3.08284	5e-05	0.000401447	yes	Alox12	0.240085	0.388738	2.71916	2.60873
Slc43a1	chr2:84839407-84863586	1.26626	10.7839	3.09023	5e-05	0.000401447	yes	Slc43a1	1.20181	1.24831	10.7698	10.0962
Tnfaip3	chr10:19000909-19015410	4.43783	38.1962	3.1055	5e-05	0.000401447	yes	Tnfaip3	2.98424	5.6026	32.6374	41.2691
Has3	chr8:106870241-106882902	18.8973	165.645	3.13184	5e-05	0.000401447	yes	Has3	18.0935	18.4712	162.956	157.553
Pld5	chr1:175962305-176275312	0.119799	1.07772	3.16931	0.00175	0.00961594	yes	Pld5	0.0546866	0.177114	1.26261	0.822692
Gria3	chrX:41401303-41678601	0.145188	1.30778	3.17113	5e-05	0.000401447	yes	Gria3	0.135069	0.145858	1.09244	1.438
Slc40a1	chr1:45908069-45925594	8.27571	75.0629	3.18114	5e-05	0.000401447	yes	Slc40a1	8.89175	7.12106	73.5934	71.6469
Fam25c	chr14:34351881-34355393	1.55532	14.177	3.18827	0.0056	0.0257993	yes	Fam25c	0.820405	2.18901	13.806	13.6254
Cyfip2	chr11:46193848-46312859	6.71475	62.2426	3.2125	5e-05	0.000401447	yes	Cyfip2	6.13098	6.8615	59.6412	60.793
Tnf	chr17:35199390-35201996	3.1495	29.8068	3.24245	5e-05	0.000401447	yes	Tnf	1.63169	4.46233	22.1996	35.4741
Stx11	chr10:12939982-12964259	0.389721	3.69955	3.24684	5e-05	0.000401447	yes	Stx11	0.385024	0.369053	2.83469	4.32363
Tmem151b	chr17:45523433-45549677	1.41699	13.8971	3.29388	5e-05	0.000401447	yes	Tmem151b	1.17721	1.56455	15.8399	11.0498
6530402F18Rik	chr2:29194820-29252993	0.25373	2.49463	3.29746	5e-05	0.000401447	yes	6530402F18Rik	0.246734	0.244211	2.6354	2.1915
Hhipl1	chr12:108306269-108328300	0.282198	2.79447	3.3078	0.00035	0.00234563	yes	Hhipl1	0.208493	0.337535	3.11125	2.29582
Gpx3	chr11:54902853-54910382	0.303912	3.00955	3.30782	0.00275	0.0141309	yes	Gpx3	0.25045	0.337595	4.18964	1.63359
Sstr2	chr11:113624256-113625636	0.299757	3.00114	3.32365	0.0039	0.0190535	yes	Sstr2	0.268323	0.31168	3.1612	2.64575
Serpina3h	chr12:104247895-104254405	6.36245	64.5759	3.34334	5e-05	0.000401447	yes	Serpina3h	4.94229	7.36851	75.962	48.987
Alpl	chr4:137741731-137796377	0.156483	1.60084	3.35475	0.00305	0.0154449	yes	Alpl	0.108185	0.194596	1.90619	1.1913
C1s	chr6:124530343-124542359	0.848524	8.81563	3.37704	5e-05	0.000401447	yes	C1s	0.741449	0.900374	7.83706	9.22044
Sp6	chr11:97013568-97024738	1.07864	11.2198	3.37877	5e-05	0.000401447	yes	Sp6	0.660651	1.42643	10.546	11.1634
Ankrd45	chr1:161142711-161170507	0.128142	1.33899	3.38533	0.00135	0.00767726	yes	Ankrd45	0.119224	0.12872	1.38875	1.20209
Lef1	chr3:131110296-131224357	8.34332	87.8389	3.39617	5e-05	0.000401447	yes	Lef1	8.44271	7.7009	83.4398	86.521
Bcl3	chr7:19808461-19822755	0.22211	2.46458	3.472	0.0024	0.0126031	yes	Bcl3	0.101449	0.328316	2.2988	2.46996
Krt6a	chr15:101689927-101694305	0.370698	4.12271	3.47528	5e-05	0.000401447	yes	Krt6a	0.323972	0.393297	4.45633	3.52077
Dgkh	chr14:78569608-78725089	0.0982463	1.10019	3.48521	0.0011	0.00645094	yes	Dgkh	0.0937176	0.0963806	1.12015	1.00864
Cabp1	chr5:115168690-115186121	1.52582	17.1137	3.4875	5e-05	0.000401447	yes	Cabp1	1.24831	1.70402	16.1727	16.941
Uchl1	chr5:66676120-66687234	1.43793	16.188	3.49287	5e-05	0.000401447	yes	Uchl1	1.20523	1.57704	15.8941	15.4284
Slc8a2	chr7:16130299-16160511	2.67531	30.4649	3.50937	5e-05	0.000401447	yes	Slc8a2	2.27252	2.90397	32.4908	26.4562
Tspan15	chr10:62185395-62231218	0.66062	7.54234	3.51312	5e-05	0.000401447	yes	Tspan15	0.665865	0.61238	7.82006	6.77373
Cldn6	chr17:23679364-23682446	1.76289	20.3309	3.52766	5e-05	0.000401447	yes	Cldn6	1.64123	1.76982	20.2339	19.1047
Dab1	chr4:104367559-104744842	0.195012	2.26062	3.53508	0.00115	0.00667996	yes	Dab1	0.252265	0.125067	1.98713	2.38697
Kcnn3	chr3:89520163-89672494	0.232233	2.73177	3.55619	5e-05	0.000401447	yes	Kcnn3	0.22786	0.221492	2.85014	2.4356
B3gnt5	chr16:19760233-19772753	0.0940426	1.10994	3.56102	0.00025	0.00173352	yes	B3gnt5	0.0774395	0.104525	1.04891	1.09872
Mpped1	chr15:83780022-83858474	5.2859	63.8766	3.59507	5e-05	0.000401447	yes	Mpped1	4.41956	5.80821	62.1775	61.4183
Cntnap4	chr8:112570042-112882707	0.324644	3.93774	3.60043	5e-05	0.000401447	yes	Cntnap4	0.217378	0.410782	4.37596	3.24323
Gfra4	chr2:131039631-131043088	0.751259	9.20292	3.61471	5e-05	0.000401447	yes	Gfra4	0.536876	0.916747	9.51819	8.28869
Runx2	chr17:44495986-45119284	0.590552	7.37409	3.64233	5e-05	0.000401447	yes	Runx2	0.61843	0.524239	5.82529	8.44296
Sp5	chr2:70474922-70477726	1.24085	15.664	3.65805	5e-05	0.000401447	yes	Sp5	1.35975	1.0412	15.6642	14.6443
Shh	chr5:28456839-28719209	11.352	147.303	3.69777	5e-05	0.000401447	yes	Shh	10.3702	11.595	142.135	142.884
Rragd	chr4:32982997-33022180	1.26278	16.4737	3.70549	5e-05	0.000401447	yes	Rragd	0.903998	1.53938	15.4669	16.4084
Rprm	chr2:54084092-54085552	0.533113	7.01883	3.71872	5e-05	0.000401447	yes	Rprm	0.32679	0.704739	8.46496	5.11588
Kremen2	chr17:23741198-23745829	16.5356	217.731	3.7189	5e-05	0.000401447	yes	Kremen2	15.4122	16.5829	204.175	217.116
Bmp2	chr2:133553198-133562885	5.5811	73.6238	3.72155	5e-05	0.000401447	yes	Bmp2	5.23115	5.56781	61.4132	81.0426
Rrad	chr8:104628065-104631321	0.291467	3.88004	3.73467	0.0014	0.00791	yes	Rrad	0.240183	0.323781	3.43449	4.07307
Notum	chr11:120653788-120660837	1.32024	17.6359	3.73964	5e-05	0.000401447	yes	Notum	1.3711	1.18345	17.752	16.3719
Six4	chr12:73100258-73113245	0.155112	2.07644	3.74272	0.0001	0.000758012	yes	Six4	0.0627924	0.237337	1.86214	2.15559
Wif1	chr10:121034003-121100642	7.81954	104.793	3.74432	5e-05	0.000401447	yes	Wif1	5.79471	9.33544	100.73	102.036
Il23a	chr10:128296139-128298084	0.307292	4.14276	3.75291	0.0019	0.0102736	yes	Il23a	0.212593	0.381991	3.82458	4.19132
Wnt10b	chr15:98771751-98778150	14.7757	204.97	3.79412	5e-05	0.000401447	yes	Wnt10b	12.5778	16.0119	198.622	197.978
Frem1	chr4:82897919-83052167	3.89815	54.4661	3.8045	5e-05	0.000401447	yes	Frem1	3.22083	4.32176	50.7922	54.5951
Padi3	chr4:140785368-140810648	0.282588	3.96936	3.81214	5e-05	0.000401447	yes	Padi3	0.262944	0.28384	3.71858	3.9618
Sema6d	chr2:124610295-124667770	1.38303	19.7739	3.83769	5e-05	0.000401447	yes	Sema6d	1.07737	1.59867	17.5809	20.6798
Hic1	chr11:75164564-75170255	0.240765	3.47945	3.85316	5e-05	0.000401447	yes	Hic1	0.138196	0.327663	3.13504	3.5974
Limch1	chr5:66745839-67057159	1.59719	23.8604	3.90101	5e-05	0.000401447	yes	Limch1	1.30243	1.78799	23.1993	22.9685
Nr3c2	chr8:76902507-77243639	0.186921	3.00069	4.0048	5e-05	0.000401447	yes	Nr3c2	0.151442	0.210233	2.49661	3.30948
Pdzrn4	chr15:92396809-92771819	0.0836482	1.34958	4.01203	0.00445	0.0212722	yes	Pdzrn4	0.105114	0.0567381	1.33216	1.27916
Cd274	chr19:29367437-29388094	0.132278	2.28194	4.10862	0.0008	0.00489383	yes	Cd274	0.0977107	0.158237	2.29213	2.12324
Ccdc85a	chr11:28385691-28584296	0.0607607	1.05481	4.1177	0.0014	0.00791	yes	Ccdc85a	0.0566251	0.0609416	1.15605	0.884919
Lor	chr3:92080270-92083142	0.45103	8.59562	4.25231	5e-05	0.000401447	yes	Lor	0.419832	0.452873	11.1558	5.476
Mapk4	chr18:73928485-74064949	0.609952	11.8763	4.28324	5e-05	0.000401447	yes	Mapk4	0.438718	0.741489	10.9438	12.0358
Gbp6	chr5:105270701-105293699	0.100984	2.04439	4.33948	0.0008	0.00489383	yes	Gbp6	0.0408849	0.15451	2.07238	1.88335
Cldn4	chr5:134945123-134946934	1.40877	28.9212	4.35962	5e-05	0.000401447	yes	Cldn4	1.33801	1.38784	25.7103	30.2497
Ifitm1	chr7:140967428-140969827	1.1022	22.9898	4.38254	5e-05	0.000401447	yes	Ifitm1	0.783939	1.34872	23.7285	20.7549
Sv2b	chr7:75114894-75331419	0.355599	8.26596	4.53886	5e-05	0.000401447	yes	Sv2b	0.296592	0.391462	7.71382	8.28011
Ntng2	chr2:29194820-29252993	0.252355	5.97408	4.56519	0.0023	0.012167	yes	Ntng2	0.296452	0.191833	6.73622	4.82312
Prokr2	chr2:132370328-132385447	0.136939	3.26745	4.57656	5e-05	0.000401447	yes	Prokr2	0.0971401	0.167826	2.47236	3.84989
Zfyve28	chr5:34194893-34288324	0.104365	2.55695	4.61471	0.001	0.00594158	yes	Zfyve28	0.177925	0.0240132	2.78245	2.16505
Kcnd3	chr3:105448189-105674002	0.0579487	1.56	4.75062	0.0015	0.00840496	yes	Kcnd3	0.0466693	0.0654566	2.11255	0.905908
Lmx1a	chr1:167689557-167848733	0.100013	2.78218	4.79796	0.0037	0.0181856	yes	Lmx1a	0.106935	0.0865812	3.43133	1.95196
Nnat	chr2:157556361-157566361	5.26754	147.715	4.80955	5e-05	0.000401447	yes	Nnat	4.34886	5.84339	150.765	135.052
Scube1	chr15:83602582-83725039	1.82045	55.9475	4.94171	5e-05	0.000401447	yes	Scube1	1.73645	1.78597	53.2563	54.9974
Grik3	chr4:125490830-125714173	0.529033	16.6315	4.97442	5e-05	0.000401447	yes	Grik3	0.283778	0.739856	16.84	15.3405
Siglec15	chr18:78043613-78057268	0.377148	12.1437	5.00893	0.00405	0.0196839	yes	Siglec15	0.0977792	0.631971	12.7767	10.7202
Nell2	chr15:95219449-95528706	0.125402	4.2282	5.07541	0.00105	0.00619942	yes	Nell2	0.185444	0.0571992	5.37188	2.80934
Fgf20	chr8:40279165-40286953	0.462517	16.4055	5.14853	5e-05	0.000401447	yes	Fgf20	0.129127	0.765805	11.0795	20.6637
Mybpc1	chr10:88518278-88605152	0.370236	14.335	5.27495	5e-05	0.000401447	yes	Mybpc1	0.158085	0.558292	10.8477	16.8894
Rimklb	chr6:122453608-122486305	0.0928874	3.84918	5.37293	0.00185	0.0100478	yes	Rimklb	0.132163	0.0475659	3.84854	3.59931
Ascl4	chr10:85928490-85929647	1.1862	50.1089	5.40064	5e-05	0.000401447	yes	Ascl4	1.19314	1.10207	44.1669	52.7896
Cd74	chr18:60803848-60812652	1.64495	84.0832	5.6757	5e-05	0.000401447	yes	Cd74	1.06751	2.11534	87.1206	75.5734
Gad1	chr2:70489939-70602012	0.120068	6.42729	5.74229	0.002	0.0107241	yes	Gad1	0.0829957	0.149326	5.22198	7.21428
Slc14a1	chr18:78100090-78142119	0.519206	36.086	6.11899	5e-05	0.000401447	yes	Slc14a1	0.298027	0.706594	33.3264	36.497
Ajap1	chr4:153373220-153482830	0.109333	12.4884	6.83571	0.0037	0.0181856	yes	Ajap1	0.116904	0.0946458	14.1544	10.0095
Dkk4	chr8:22624042-22627546	0.685474	80.5903	6.87736	5e-05	0.000401447	yes	Dkk4	0.294512	1.03182	56.6682	99.2673
Kcnip1	chr11:33629340-33993193	0.130963	16.5646	6.98281	0.0004	0.00264585	yes	Kcnip1	0.121579	0.131823	14.0802	17.971
Ildr2	chr1:166254138-166316832	0.0847833	15.7882	7.54085	5e-05	0.000401447	yes	Ildr2	0.07342	0.0906286	16.5121	14.0367

## Sheet: Sheet2
	Nfatc1-1	Nfatc1-2	Shh-1	Shh-2
1190005I06Rik	7.99439	5.73228	0.960082	0.515658
1600029D21Rik	12.9007	10.5464	3.20818	4.38184
1810011O10Rik	26.1212	24.2486	7.83231	8.83576
2610203C20Rik	28.3906	25.5975	9.81707	10.1411
2900011O08Rik	2.43853	2.29739	0.334059	0.201905
2900041M22Rik	1.36348	2.08883	0.38731	0.49935
4921531C22Rik	1.26592	1.1556	0.315214	0.423357
4930451G09Rik	3.1348	2.75196	1.71507	1.00494
4930556M19Rik	2.41104	1.8943	0.836412	0.244382
4933431E20Rik	4.82515	4.30143	1.20481	1.43535
5430435G22Rik	20.1706	23.6317	5.97313	5.25117
5730559C18Rik	8.96356	10.2865	4.14364	4.71125
6430571L13Rik	6.0382	5.86511	1.49432	1.91442
9430076C15Rik	1.15491	1.31061	0.415246	0.669281
A730056A06Rik	4.39412	3.93683	0.781922	0.525086
A930004D18Rik	2.18983	2.36529	0.448475	0.722841
Abca1	16.0661	17.5811	6.8114	6.44705
Abca12	5.83867	5.86789	0.8529	0.72355
Abcb9	2.2217	2.10946	0.375323	0.232669
Abtb2	7.41795	7.17551	3.60412	2.98852
Acacb	2.03081	1.34474	0.825296	0.798151
Acadl	35.7813	32.9127	7.17796	8.51125
Ace	3.81293	3.76942	1.9498	1.49357
Acer1	2.80833	2.8691	0.282762	0.260422
Acer3	25.3482	24.4272	11.4476	10.9116
Acot1	108.546	104.409	45.4544	51.903
Acpp	12.8836	12.9668	3.17552	3.25004
Acsbg1	12.7685	9.85414	1.08644	1.12973
Acsl1	16.0081	15.9806	7.98168	7.4814
Acss2	6.07088	4.49433	2.36571	2.32093
Ada	4.35093	4.04309	1.78493	1.72491
Adamts19	27.2448	33.2875	3.98537	4.16228
Adamts9	12.7524	14.8962	4.24087	3.14134
Adamtsl1	16.3963	19.1908	6.83581	7.36473
Adcy7	28.3682	20.0111	9.92757	9.43215
Adh7	1.63815	1.09872	0.382145	0.153977
Adrb2	4.96754	11.2746	0.462019	0.595715
Aebp1	6.83779	8.27917	2.1676	1.25319
Aff1	8.35732	10.062	3.24327	2.87611
Agl	14.1191	16.1523	6.48451	7.90925
Ahr	21.3909	19.6085	3.67571	5.56469
AI464131	24.2075	22.5963	9.79027	8.90153
Aim1	42.8535	44.4628	14.8097	14.2248
Ak1	11.3907	9.68798	1.7307	2.21687
Akap2	9.0442	10.7672	4.47239	5.00446
Akr1b3	22.6321	14.7791	9.35333	6.01932
Alad	27.4885	25.6754	5.92541	5.90587
Aldh1a7	4.33755	3.1361	0.868432	0.544312
Aldh1l1	7.64176	8.24908	2.63263	3.33394
Aldh1l2	2.74992	3.42307	0.842798	0.754693
Aldh3a1	6.87764	3.76746	0.575072	0.411912
Aldh4a1	68.4199	64.3323	26.3867	27.7367
Aldh6a1	21.9673	22.5046	9.93233	9.46604
Ampd3	11.933	11.54	6.23978	5.49203
Angel1	11.3509	14.3185	5.38855	5.32321
Angptl2	29.4151	29.6333	12.1938	13.2225
Ank	104.366	102.115	28.0727	24.2617
Antxr2	2.27126	2.04348	0.612406	0.863688
Anxa6	58.8918	64.5721	28.9177	30.3102
Anxa8	34.224	24.5243	5.09911	7.95865
Aox4	4.81996	4.17531	1.46609	1.10481
Apba1	0.945142	1.09164	0.0707764	0.182528
Apobec3	2.21735	1.75038	0.55814	1.28511
Apoc1	82.9237	55.7187	18.5987	22.4357
Apoe	866.339	609.602	51.9582	47.1515
Apol8	1.21521	2.021	0.218541	0.17611
Aqp1	2.51614	3.13905	1.19846	0.852188
Arap1	19.1862	20.7187	7.638	7.88402
Arc	15.9177	48.5798	8.18829	8.40934
Arhgap18	9.6366	10.802	3.23473	3.80343
Arhgap25	7.48268	6.42909	3.29152	2.90516
Arhgap28	5.85067	7.63508	2.45265	1.86203
Arhgap31	1.90991	2.24484	0.763212	0.800592
Arhgef10	28.3537	29.5504	15.0973	12.5716
Arid5a	3.70403	4.80558	1.25342	1.26551
Arl4d	2.85074	5.02254	1.72615	2.05617
Arpc1b	54.2406	53.7512	19.3149	18.3798
Arsb	2.97324	3.97682	1.55546	1.34997
Art4	14.364	15.7073	6.34672	6.17739
Artn	1.89553	2.27262	1.18158	0.878942
Atf5	62.5931	55.3305	31.794	26.0979
Atoh1	6.20709	7.21981	0.237478	0.229648
Atp1a1	440.244	433.534	165.362	160.326
Atp1b3	115.115	103.886	47.348	51.7281
Atp6v1b1	70.586	69.5634	23.9171	18.4792
Atp8a2	1.59073	1.66537	0.10398	0.125695
Atp8b1	6.2095	5.888	2.43622	2.89218
Avil	0.975874	1.34071	0.191385	0.154234
Barx2	249.108	253.712	62.1135	49.5553
BC016579	6.73173	6.54201	0.811974	0.799745
BC100530	397.111	469.808	87.8421	91.8589
BC117090	24.6992	25.9873	6.90298	8.50077
Bcas1	2.61697	2.98907	0.196934	0.370316
Bgn	87.8964	90.2485	41.5312	35.7219
Bmp1	65.6806	64.0132	28.262	28.4598
Boc	49.6654	53.0472	16.1653	16.8512
Bre	36.3966	34.4173	15.2196	19.5962
Btbd3	34.5825	34.6199	15.9611	17.344
C1qtnf1	1.61903	2.64653	0.618933	0.463161
C920025E04Rik	6.39697	6.00324	2.35599	2.48761
Cables1	10.3375	9.12314	4.07367	3.24816
Capn1	55.5364	57.049	23.4586	25.3249
Car13	18.8274	19.8884	4.32799	4.00576
Casp1	7.5357	7.99076	0.338874	0.109228
Casp14	3.52213	4.13873	1.73099	1.29288
Cav2	44.5192	37.3427	17.5938	18.6489
Cbr3	21.9382	28.7337	8.19893	7.63416
Cbs	19.5954	22.6594	7.83009	6.12357
Ccdc164	1.08925	1.00128	0.174094	0.210443
Ccdc3	31.5287	35.5343	15.2993	14.0147
Ccdc80	1.46146	1.78821	0.446603	0.719831
Ccl27a	37.0262	32.8182	13.2848	12.8935
Ccnb1ip1	3.59274	1.69923	0.884345	0.877071
Cd109	63.0747	54.9984	8.26744	9.15979
Cd248	1.80392	4.12286	1.41179	1.47596
Cd34	1.45729	2.34867	0.819306	0.769047
Cd36	1.62511	1.49777	0.334222	0.683983
Cd44	183.24	178.653	26.2269	28.3361
Cd59a	14.8737	13.1337	4.96091	5.92431
Cdc42ep3	38.3672	39.6182	4.46437	5.06937
Cdh13	12.1659	10.2875	1.07582	0.832282
Cdhr1	1.2506	1.85949	0.552762	0.748393
Cdkn1a	44.0231	42.8448	22.421	18.3967
Cdkn2c	21.0177	16.5489	4.46124	5.62649
Cdo1	2.54275	2.80894	1.47252	0.970844
Cebpb	106.206	98.6433	38.1401	29.5794
Chchd10	8.30306	6.50281	1.74704	1.87685
Chdh	48.5792	46.0087	21.581	19.0655
Chl1	3.55902	2.79231	1.36371	1.34219
Chmp4c	3.54449	3.71103	0.95618	0.634552
Chrm1	1.366	1.74949	0.807571	0.482101
Chst3	2.39801	2.60517	0.446377	0.669864
Cib2	32.7517	29.8317	14.0322	14.1312
Cish	15.7526	14.7984	1.19104	1.47663
Cited2	26.6771	33.2405	13.0236	10.9442
Ckmt1	82.4673	74.575	33.3023	26.1636
Clca1	2.52328	2.85193	0.928585	1.03218
Clca2	10.0181	11.9972	4.32723	4.43838
Cltb	55.743	50.9273	21.0457	22.3338
Cma1	5.84396	6.69588	2.70447	2.90552
Cnp	4.8598	6.30055	2.06684	2.71934
Cntfr	166.833	161.093	63.6906	56.7246
Cobll1	21.8819	21.635	7.93855	8.46119
Col12a1	20.5688	27.246	3.36969	3.89062
Col14a1	89.1868	85.4497	27.3908	27.1472
Col15a1	1.33391	2.70311	0.657084	0.830107
Col16a1	76.5231	78.2175	6.60909	7.69684
Col17a1	310.352	316.706	125.81	127.321
Col23a1	0.864242	1.13331	0.349493	0.321898
Col25a1	3.83637	3.88143	0.542178	0.486137
Col3a1	75.6826	160.066	59.0665	52.9037
Col4a6	12.3089	12.0774	4.91389	5.21197
Col5a3	0.874525	1.22314	0.0772992	0.274105
Col8a1	8.15257	8.17353	1.29564	1.79
Col9a3	42.7017	45.1698	3.07076	3.18957
Copz2	21.4364	22.6065	8.23535	5.19292
Cpd	22.8455	23.3288	10.6358	11.3468
Cpeb2	8.32976	9.13503	3.43393	3.85963
Cpm	5.43328	4.75577	0.891629	0.879886
Cpsf4l	20.5216	24.1854	10.0643	11.8387
Cpt1a	10.1967	10.8327	1.37184	2.53212
Cpxm1	38.7042	41.6476	16.134	14.7006
Cpxm2	1.59966	1.50768	0.575111	0.441407
Crabp2	7.11933	7.41774	1.61253	1.79894
Creb3l4	8.47818	7.03816	3.75211	3.81919
Creb5	17.4744	18.3886	8.71519	7.45896
Crim1	46.8252	52.2986	19.0924	19.8157
Crip1	27.8359	29.4881	6.41773	6.71902
Crtac1	4.25496	3.5096	0.298535	0.360873
Cryab	2.98424	3.66279	0.894969	0.865375
Csta	1.02442	1.24837	0.21388	0.45963
Ctsb	103.404	98.6061	47.4805	46.4656
Ctsc	22.1223	21.4159	7.69069	7.66726
Cwh43	41.5985	24.3889	10.231	10.9932
Cxcr4	51.9335	54.0831	12.4715	18.4921
Cxxc4	1.26083	1.26074	0.436432	0.270559
Cyp17a1	1.76901	0.817864	0.327227	0.439489
Cyp26b1	0.860797	1.83882	0.625599	0.552953
Cyp27a1	1.42424	1.37754	0.158975	0.256218
Cyp27b1	1.91642	1.05437	0.283763	0.261344
Cyp2d22	7.36121	7.03468	1.47592	1.41704
Cyp4b1	9.43483	6.85691	0.214323	0.0863553
Cyyr1	1.76816	2.73931	0.635911	0.867224
D430041D05Rik	1.05749	1.17909	0.514945	0.429829
Dact2	7.40879	8.03147	1.52224	1.11522
Ddhd2	10.5294	11.5031	4.84121	5.14213
Ddr2	1.36893	1.52372	0.631004	0.435892
Decr1	6.92067	6.45467	2.81575	2.95519
Defb1	28.0993	21.5417	0.607048	1.17386
Deptor	2.95612	3.17068	0.747215	1.0978
Diap3	20.9614	17.765	7.01728	10.1661
Dio2	19.4555	22.3087	0.453626	0.522262
Dixdc1	22.5046	21.6122	5.53954	4.41124
Dkk3	21.1004	23.2381	8.22635	11.4573
Dlg2	1.89916	2.40698	0.285827	0.281367
Dlk2	16.9682	16.0945	0.935692	2.47742
Dll1	11.8548	12.6298	3.64522	3.79636
Dll3	2.71471	3.0208	0.183053	0.29503
Dnahc7b	1.9915	2.83811	0.241098	0.218597
Dock5	1.44448	1.63242	0.441143	0.333762
Dok5	4.89567	6.4734	3.12422	1.5619
Dpt	3.05088	5.89803	2.04998	2.40282
Dpysl2	2.86378	3.52172	1.90885	1.20994
Dsc3	150.597	149.164	57.6602	64.1209
Dsg3	34.9907	37.06	10.6992	11.8208
Dusp5	4.01358	8.09804	2.58159	2.82309
Ebf1	1.22247	1.36313	0.131886	0.14171
Eci1	13.3249	13.4716	4.63179	5.08203
Edn1	8.6362	6.96882	1.34297	1.35282
Edn2	34.2534	34.3854	18.8699	13.9096
Eea1	18.2732	18.8397	7.93646	8.6757
Efnb2	62.0594	61.12	21.8985	25.3536
Egfl6	5.35186	8.05088	2.74223	2.50068
Egflam	9.80574	11.3434	1.24993	1.15123
Egr1	678.952	744.876	262.397	290.336
Egr2	98.4388	142.615	32.8346	39.3885
Egr3	85.7099	119.691	33.5872	33.6546
Ehd3	1.79731	1.62577	1.07402	0.379997
Ehf	8.8235	8.91968	1.62571	1.15295
Eif2c4	5.59618	6.20251	2.00193	1.90357
Elmo1	24.8004	25.6135	3.31555	3.59908
Elovl5	36.7914	34.3931	14.6858	13.2439
Elovl6	22.5713	19.3834	8.19777	6.22408
Endod1	4.04096	4.0228	1.70069	1.54191
Enox1	18.3788	18.4049	7.1259	8.14319
Enpp1	7.43122	11.674	1.91412	1.92821
Epas1	1.30906	1.0249	0.494091	0.312866
Epb4.1l1	6.826	7.22916	2.14137	2.78617
Epb4.1l4b	45.6291	46.7696	21.9799	21.1611
Epdr1	2.67054	2.84081	0.658511	0.928676
Epha4	18.526	17.9995	8.64452	8.61867
Ephb1	1.28183	1.4859	0.12539	0.101046
Ephb6	101.014	106.08	18.3784	13.8674
Ephx1	38.0504	32.4544	16.0835	14.9243
Ephx2	4.82436	3.60083	2.1081	1.86665
Epn3	6.02289	6.42889	1.8946	2.65713
Eps8l1	1.76253	1.63046	0.892469	0.375243
Eva1a	16.8025	20.8605	8.21033	9.55672
Exph5	2.23169	1.86622	0.882971	0.954025
Eya1	1.40491	1.30653	0.285643	0.327863
Eya2	26.4901	23.6647	13.4741	11.5484
Fabp4	5.65366	9.493	3.24795	2.77042
Fah	13.654	10.9314	3.7321	3.62964
Fam114a1	2.95488	4.47198	1.57722	1.90658
Fam132a	142.782	132.541	25.5166	23.2984
Fam13c	1.86381	2.09004	0.440952	0.662966
Fam160a1	13.3225	13.2353	5.91619	6.49689
Fam161a	1.62563	1.75381	0.619065	0.498872
Fam163b	3.3545	3.52218	1.21708	0.477159
Fam167a	3.91958	5.24516	1.28165	1.26845
Fam189a2	2.09912	2.1503	0.307042	0.309296
Fam212b	7.44628	7.35372	2.60283	1.91878
Fam26e	3.03068	2.76192	0.338306	0.27262
Fam63b	8.38742	8.88531	3.9669	4.34347
Fam69c	1.57732	1.83996	0.459931	0.593023
Fam81a	6.20901	5.72534	2.59149	3.14621
Fam83c	8.82008	9.01275	3.74716	3.25721
Far2	9.02877	6.06364	0.73603	1.27758
Farp1	96.6252	102.249	45.4694	46.2493
Fat2	25.1064	26.3874	8.55443	9.10958
Fat4	1.94984	2.79693	0.947758	0.907338
Fbln2	95.2713	94.8998	26.6673	26.6621
Fbn2	10.9901	13.365	1.64213	1.75982
Fbxl16	1.06867	1.09879	0.493986	0.5308
Fbxo44	3.6385	2.23745	1.4432	1.36436
Fcgrt	8.23793	9.75705	1.62683	1.03004
Fgf1	2.1982	2.37336	0.268852	0.236364
Fgf13	1.60167	2.2	0.706839	0.506329
Fgf2	3.97098	4.09882	0.686854	0.553346
Fgfbp1	111.818	96.2792	28.5449	36.4596
Fgfrl1	3.64216	3.9124	2.09299	1.65712
Fhdc1	4.43195	4.56365	1.88946	1.74027
Fhod1	1.48028	1.5256	0.798247	0.701789
Fhod3	9.71136	10.0328	3.45598	2.64454
Fmn1	1.57422	1.8343	0.290744	0.519304
Fmo1	2.94188	2.58209	0.719387	1.15946
Fmo2	2.40755	2.51243	1.00985	0.511549
Fos	807.098	726.509	239.546	204.728
Fosb	125.207	81.3518	22.2236	22.3414
Foxc1	11.3353	10.7298	2.99049	2.04371
Foxo1	22.2007	21.0141	7.86701	6.65507
Foxq1	2.66606	2.11491	1.00481	0.893527
Frk	2.05586	2.21277	1.02098	1.08612
Fst	133.394	138.603	10.652	18.6611
Fxyd3	295.361	250.226	121.061	125.808
Fzd1	26.527	27.5338	6.58189	5.74202
Fzd5	5.78465	7.15848	1.97205	1.83637
Fzd7	106.449	111.376	29.345	26.683
Galnt18	17.5551	17.314	5.04746	5.68854
Gas1	139.636	134.746	35.379	33.0106
Gas6	46.0947	41.4953	22.7903	19.55
Gclc	63.2451	63.5332	22.2427	23.2824
Gclm	32.2164	32.8425	14.5268	12.5951
Gcnt2	5.38364	5.62041	2.10506	1.97243
Ggct	11.31	9.526	4.34912	3.19712
Ggt6	12.5247	11.8565	4.6336	5.3342
Ghr	14.3199	15.9452	6.06182	6.10675
Gja4	1.67033	1.56139	0.360499	0.774671
Gjb3	56.7656	42.6305	15.0957	12.8461
Gjb4	25.9194	17.396	0.428195	0.460059
Glrx	9.75622	9.49714	4.24396	5.31965
Glt1d1	3.82615	2.55433	0.917613	1.47886
Glt28d2	5.86845	5.97823	2.09825	2.12083
Gm2a	6.42999	6.38288	2.5054	2.55994
Gm3893	10.1881	8.24263	2.45688	3.04613
Gm6537	148.077	178.856	2.98981	7.80863
Gm7694	1.38784	1.49841	0.673569	0.603142
Gm973	20.2567	19.8134	0.0533526	0.12899
Gmds	23.1608	20.0212	7.53974	8.97664
Gnai1	14.8743	14.9986	6.01257	8.81435
Gng7	11.2767	11.8301	4.32138	5.12006
Golim4	59.3307	60.4268	15.4856	16.035
Gpc6	1.69347	2.05234	0.348496	0.449324
Gpd1	1.90959	1.78167	0.174565	0.506441
Gpr125	139.281	142.272	50.8552	48.6338
Gpr135	1.88969	2.11277	0.982087	0.121749
Grb14	35.8407	38.5661	5.94547	7.6167
Grhl1	35.828	35.158	14.7369	15.0911
Grm4	2.65595	2.83435	0.651102	0.262356
Gsn	162.448	163.703	52.5704	51.1291
Gucy1a2	1.09618	1.00143	0.499777	0.413672
Gusb	8.43692	8.58606	3.7524	3.66734
H2-T23	66.9011	39.662	13.0799	7.02649
H2-T9	7.28174	5.88984	3.88122	2.18979
Haao	3.35398	2.58208	1.12075	0.416807
Has2	6.78173	7.07547	0.381402	0.289292
Hdac4	19.8874	21.3753	8.71506	9.87186
Hepacam2	2.49647	2.07562	0.0883057	0.213486
Hid1	1.32534	1.81822	0.476506	0.480014
Hist1h1c	30.5655	27.8614	7.39586	7.06731
Hist1h2bc	19.8979	18.9867	5.4981	3.38727
Hmgn3	84.942	77.4649	35.4491	29.3446
Hoxa1	6.20503	4.75498	1.10904	1.40445
Hoxa2	18.043	12.2309	2.59208	2.23451
Hoxa3	11.5872	10.0814	2.38457	3.59536
Hoxa4	7.39095	6.63073	3.08342	3.02482
Hoxa5	22.515	18.9509	4.21806	5.85162
Hoxb9	4.65126	4.58683	1.55214	1.80352
Hpn	7.96596	7.03817	4.16427	2.5117
Hsd11b2	5.2316	4.39558	0.162838	0.174962
Hspa4l	15.4767	15.6561	3.5866	2.56443
Id4	87.3431	88.8289	11.9195	10.8365
Idh1	181.756	174.34	76.001	75.0248
Iffo2	31.3317	32.2012	8.62411	7.92043
Ifi27l1	8.66963	8.74811	2.57247	2.64933
Igf1	1.28078	1.81348	0.0795406	0.363333
Igfbp2	19.1484	17.8954	3.77241	6.58623
Igfbp3	4.84004	6.87076	2.49018	2.84831
Igfbp5	46.8955	51.7562	21.3353	21.6551
Igsf8	28.7033	28.6723	14.2447	12.7626
Il13ra1	23.1138	21.91	9.77408	10.9355
Il17rb	13.5421	14.0327	4.58098	4.50764
Il17rc	15.5385	15.1624	7.59316	5.82063
Il1f5	7.88743	7.88653	3.85657	3.47747
Il20rb	16.8603	16.1391	4.82389	4.84335
Il22ra1	2.21956	2.20264	1.01886	1.09481
Il34	4.05404	3.81854	1.0579	0.947203
Il6ra	3.33647	3.22729	1.20915	0.974445
Ildr1	3.46969	3.94762	0.910376	0.652137
Inhbb	35.7471	36.5145	6.17554	5.58998
Insm1	5.10592	5.5116	0.0960605	0.516091
Irak3	2.78261	2.12214	0.587244	0.525834
Irx1	105.109	110.66	57.0152	43.8875
Isoc1	101.331	106.845	50.9938	52.8666
Isoc2b	3.66167	2.023	1.41939	0.653532
Itfg3	34.4449	31.883	12.3165	13.9829
Itga1	7.90918	8.99855	0.613707	1.11601
Itga4	3.55745	3.44407	0.539858	0.656446
Itga6	89.2856	93.4344	24.5319	32.0926
Itga8	3.36991	3.72088	0.635546	0.630394
Itgb6	3.57971	3.78618	1.02946	1.18065
Itih5	3.18262	4.64235	1.29725	1.53971
Itpka	2.88711	2.44704	0.111262	0.806934
Jak3	2.50265	2.82425	0.963483	0.881364
Jdp2	1.54689	2.09504	0.58977	0.527979
Junb	259.593	287.95	124.911	139.929
Kank1	41.1683	46.1178	21.0635	20.5335
Kank4	3.88089	4.32907	0.829158	0.731865
Kcnab3	2.28755	2.04451	0.886833	1.11862
Kcnh1	2.51057	3.02529	0.570747	0.449261
Kcnip3	5.73507	5.67647	2.46239	2.12675
Kcnk7	11.631	11.7671	1.05454	0.617969
Kcnv1	1.21482	1.37521	0.359228	0.374651
Kctd14	10.4237	9.90009	1.05695	1.09878
Kctd7	1.30356	1.51922	0.736401	0.611451
Kirrel2	1.80705	2.35321	0.123754	0.24933
Kirrel3	1.12907	1.43645	0.284625	0.394017
Klf15	13.9745	11.8149	5.75555	5.88428
Klf2	3.28361	1.77108	1.21796	0.267677
Klf3	18.223	19.1967	8.08503	8.71011
Klhl3	1.37174	1.98893	0.64748	0.745395
Klk10	11.1011	11.2008	5.22324	5.4468
Klk7	1.55454	1.79247	0.694132	0.466131
Klrg2	16.1355	14.2148	2.93726	4.66444
Krt15	1844.37	1748.95	836.683	785.715
Krt28	4.53915	2.75756	0.690002	0.77842
Krt35	1.52304	1.34945	0.234788	0.1892
Krt71	1.64524	0.910401	0.318592	0.220063
Krt73	12.2714	8.13776	0.82746	0.814997
Krt79	482.491	413.593	192.088	181.3
Krt80	24.8468	26.3479	13.4625	10.6198
L3hypdh	12.0434	10.6769	5.40026	5.35595
Lap3	118.35	103.866	17.8796	17.6688
Ldlrad4	6.55508	7.74259	1.96428	2.15282
Leprel1	8.66708	8.65001	3.20462	2.47635
Lgals9	32.6097	33.2065	6.74171	6.763
Lgi3	14.9053	12.4472	0.15167	0.244458
Lgr4	159.843	163.546	55.9632	63.9223
Lgr5	42.3953	45.4163	3.34198	3.82906
Lhx3	3.9411	3.98411	0.0895139	0.288543
Lifr	48.4027	50.5962	2.2164	3.07388
Lmcd1	48.2798	52.1936	1.87111	0.942378
Lmna	299.346	297.118	100.413	92.0001
Loxl1	1.17628	2.10681	0.519024	0.511227
Lpar3	19.1836	17.875	4.24103	3.73418
Lpar5	2.96312	2.22887	0.669403	0.839073
Lpcat2	10.3948	10.2472	3.3673	3.52493
Lpcat3	25.2489	22.3947	11.4664	12.0473
Lphn2	48.6072	48.0712	21.3489	23.0074
Lpl	21.7149	18.9643	0.801069	1.06331
Lrig1	246.284	231.055	52.1015	57.3989
Lrig3	59.8426	62.8914	29.0902	28.4742
Lrrc17	2.09472	2.9384	1.12997	1.09271
Lrrn3	5.15216	5.03904	0.275096	0.487735
Lrrtm1	2.84283	2.17486	1.12576	1.12621
Ltbp2	2.61084	3.60295	0.199066	0.0916748
Ltbr	17.1508	16.465	3.27381	4.05291
Ly6d	102.903	81.2146	46.886	27.04
Lynx1	1.47872	1.23371	0.604095	0.350524
Maf	8.90586	8.53497	4.05267	3.85985
Magee1	5.94919	5.79413	2.51202	2.15645
Mal2	14.1655	10.9062	3.5397	3.27622
Mall	14.6228	13.8486	4.05852	4.66055
Mamld1	8.38072	8.07221	1.49636	1.85432
Man2a2	40.8845	40.711	14.414	14.434
Manba	2.68369	3.23674	0.234687	0.714503
Mansc1	1.5336	1.03438	0.579059	0.533308
Mcc	14.767	15.1026	6.88244	6.03054
Mctp2	1.69041	1.80923	0.73241	0.944415
Mdga1	3.00552	2.14343	0.680334	0.857335
Medag	1.31382	1.75579	0.26994	0.978927
Megf6	105.35	111.593	45.2604	39.4884
Mfap3l	9.79911	10.6371	0.904726	0.65488
Mfsd4	9.77776	10.2096	3.41141	4.88822
Mfsd9	7.49647	7.90849	2.08272	2.02399
Mgll	5.82813	5.21759	2.08725	1.34418
Mgst1	65.438	49.7827	11.8387	9.44427
Mgst2	14.8575	15.9557	6.00044	3.79785
Miat	18.6477	23.8929	0.438958	1.62219
Mir22hg	2.01035	2.0544	0.342523	0.368024
Mitf	9.6162	12.1705	0.849745	1.26935
Mmp2	48.9236	66.4993	20.5167	20.3536
Moxd1	160.212	144.863	57.5928	53.7151
Mrc2	11.0396	12.2636	4.53128	3.48167
Mreg	11.2165	9.98283	4.71428	3.35587
Msn	103.89	104.066	30.5517	31.3037
Msrb3	8.33311	9.53968	2.58263	2.66411
Mst1	1.83831	1.76812	0.517364	0.486412
Mst1r	2.05575	2.15929	0.584482	1.07202
Myo1d	12.0574	12.3847	5.18696	5.0049
Myrip	1.1446	1.61472	0.199092	0.12836
Naprt1	4.91116	3.39086	1.11282	0.683249
Nav1	6.30758	5.78712	1.62031	1.76847
Nbl1	45.664	51.5452	5.95191	5.25745
Ncald	21.8393	23.0988	0.927596	1.39129
Neat1	53.7301	46.8149	13.3343	13.2672
Nedd4l	6.97086	6.96348	3.7317	3.16143
Neurl1b	28.0186	26.1496	2.40131	2.57218
Nexn	2.15583	3.08958	0.609994	0.798814
Nfatc1	110.89	114.645	24.9725	19.8674
Nfic	35.4821	34.7313	13.7821	11.4187
Nfil3	10.5276	13.0594	4.45344	3.79042
Nfkbib	22.3712	26.7543	11.1445	10.2638
Niacr1	8.98599	10.5154	3.07799	2.23235
Nkain2	0.781242	1.23492	0.270853	0.291036
Nlgn1	3.27887	3.62954	0.061865	0.166192
Npr2	2.74611	3.56824	0.943583	0.802675
Nr4a1	160.715	289.487	61.4983	101.543
Nr4a2	0.592878	1.59997	0.41568	0.566898
Nrbp2	103.11	91.0648	39.5491	43.6335
Nrcam	1.82445	2.36524	0.152642	0.307543
Nrep	306.611	291.765	116.251	127.02
Nrip3	1.0187	1.66203	0.43947	0.59028
Nrsn1	1.07438	2.50403	0.231828	0.523097
Nrtn	28.947	31.1812	13.5037	11.823
Ntf3	7.40381	6.50407	1.7056	2.98253
Ntn4	8.98303	8.39092	2.72809	3.08444
Nuak1	41.1501	43.0009	14.5408	15.3512
Nudt6	5.77643	4.41653	1.8109	2.91829
Olfml2b	1.50526	2.59357	0.124893	1.05682
Olfml3	10.7822	9.36235	1.45438	1.12511
Oplah	18.7311	17.696	6.20479	6.27962
Osbpl5	41.0535	41.4464	20.0458	19.7922
Osmr	7.61446	7.63364	2.195	1.9585
P2rx4	3.93989	3.75067	1.30029	1.69267
P2ry1	9.62232	9.45353	0.934496	0.753109
Pak3	3.80281	4.19838	1.96507	1.45885
Palld	14.4676	15.8886	0.968528	1.12743
Palm2	1.33225	1.46178	0.433245	0.532932
Palmd	28.9797	29.2221	9.10819	10.6463
Paqr7	9.04424	8.46047	3.36483	2.86651
Parvg	2.99661	2.16843	0.69793	0.710425
Pcdh20	9.42122	9.66782	0.270689	0.319955
Pcdh9	1.79099	2.12221	0.674829	1.01432
Pcolce	3.14228	6.31216	2.9258	1.71467
Pcsk2	1.57571	1.62142	0.379844	0.515569
Pde1b	2.03734	1.67399	0.524799	0.475792
Pdgfb	19.8811	20.4712	5.04005	5.09702
Pfkp	8.72685	7.60024	2.73018	2.50906
Phactr1	1.75444	1.44764	0.0747997	0.200844
Phyh	14.5489	16.7339	4.88522	5.62368
Phyhip	61.1109	57.4848	11.3294	10.9562
Piezo2	1.98641	1.78949	0.476924	0.628963
Pitpnm3	5.62841	6.04106	0.595792	1.2086
Pkp1	236.396	228.516	106.005	114.669
Pla2g2f	34.6263	31.3688	5.67561	3.82772
Pla2g7	37.7129	34.4185	1.61932	1.68377
Plat	5.98166	5.0254	2.39564	2.24196
Plbd1	26.7909	25.8724	11.2694	10.8326
Plcd1	5.62994	6.88661	2.83414	2.31363
Plcl1	7.32006	8.65171	0.658985	0.62345
Plek2	28.7695	30.4327	10.1519	12.749
Plekhf1	2.30783	2.35784	0.917613	0.105633
Plekhg6	12.5405	12.5103	4.71191	4.44304
Plin2	41.3254	36.9395	17.73	16.9398
Plxdc1	1.1852	1.24564	0.134528	0.054133
Plxna2	10.7183	11.9911	3.34406	3.36715
Pm20d2	5.10094	5.64418	2.16646	2.64624
Pnp	21.9045	22.0614	9.09512	8.71054
Pon3	4.91784	4.28907	1.12908	1.18281
Pou2f3	57.9117	52.8734	22.6221	24.2657
Pou3f1	36.4584	41.1891	8.81049	6.73745
Pou4f3	10.7719	12.4434	0.279128	0.74971
Ppap2c	24.5287	21.3369	11.9702	9.64596
Ppara	1.35025	1.22521	0.116996	0.125717
Ppargc1b	3.71819	3.90932	1.31053	1.22514
Ppp1r14a	20.6173	22.3661	2.97539	2.79606
Ppp1r14c	87.1175	88.397	42.9573	38.6798
Ppp2r3a	19.8417	22.3951	5.85682	6.52559
Ppp3ca	31.537	35.9232	13.4745	14.3813
Prdm1	34.5085	38.4798	7.52007	5.95677
Prelp	3.15945	5.08984	0.532441	0.643637
Prickle2	1.92637	1.98495	0.35257	0.195952
Prkcdbp	33.4582	34.5614	8.79463	6.1471
Prkd1	2.51331	2.2824	0.405335	0.653316
Prlr	3.68637	3.24008	0.592002	1.28645
Prrt2	3.75579	4.05336	2.00615	1.8386
Prss12	2.11795	2.32335	0.0749085	0.664035
Psapl1	16.1949	11.4859	3.37888	2.78483
Ptger4	1.85462	3.17692	0.517394	0.500347
Ptgfr	1.2582	1.38014	0.452309	0.138864
Ptgs1	1.50817	1.05136	0.372815	0.218505
Pthlh	133.481	132.826	40.6272	42.8492
Ptpla	19.195	15.9484	9.55188	7.94601
Ptprv	28.5442	23.3873	4.96764	4.36519
Ptrf	48.7311	52.7859	24.8425	24.488
Pxdc1	9.87597	11.832	2.46327	3.6248
Rab38	32.4389	33.3025	11.5831	13.5577
Rab3b	4.35553	3.86028	0.376987	0.42066
Rai14	29.9564	30.6131	13.7413	13.0733
Ramp1	15.2358	17.0033	0.959104	0.995138
Rapgefl1	70.0174	64.7149	17.4419	18.4468
Rasa4	1.01953	0.967096	0.333256	0.338778
Rasd2	4.64878	4.4987	0.484167	0.78036
Rassf5	7.98543	8.36643	1.8073	1.54752
Rbm24	1.69143	2.12527	0.299081	0.0964103
Rell1	40.3835	37.1927	16.4532	18.1268
Rem2	1.67269	2.17604	0.583921	0.513328
Rerg	27.428	24.8689	4.20283	4.47784
Ret	1.06584	1.08612	0.153092	0.150522
Retsat	9.65813	6.65417	4.1271	3.32582
Rgag4	1.25424	1.14394	0.373533	0.49655
Rgma	88.2825	86.2351	24.045	20.3046
Rhbdf2	16.8748	24.4581	6.36483	5.93482
Rin3	1.22989	2.14385	0.420443	0.410923
Rnase4	27.885	25.3563	10.9152	11.7186
Rnf150	2.73825	2.20623	1.08677	0.806094
Rnf217	17.8102	16.8467	7.7389	7.38548
Rnf39	9.24974	10.3298	2.56717	3.44776
Rorc	8.37645	7.55304	1.7603	1.51315
Rsph3b	2.80488	1.32347	1.07205	0.508168
Rtn4r	13.5822	13.5294	5.08124	4.99983
Rtn4rl1	2.05113	2.41822	0.669521	0.422264
Rundc3a	2.52197	2.47885	1.00445	1.43125
S100a1	7.84459	8.02604	2.22213	4.2311
S100a14	409.939	350.636	91.4421	109.431
S100a6	63.9995	68.1728	27.7701	30.9775
S1pr5	1.89207	1.7671	0.78504	0.442848
Sbspon	3.7753	4.4292	0.424948	0.513685
Scd1	46.8298	41.5061	9.14846	7.07285
Scel	34.683	34.9346	3.99129	4.49291
Scnn1b	4.25667	3.55253	0.469911	0.641214
Scnn1g	5.48229	5.6889	1.20884	1.8957
Scube2	2.69713	2.21084	0.404028	0.607794
Sdc3	13.1357	14.7375	4.49346	4.32717
Sdpr	5.66401	5.82898	1.10792	2.14286
Sdr16c5	49.9062	42.0074	2.63322	3.15248
Sdr16c6	38.7354	32.7672	7.37478	6.52217
Sdr42e1	10.6717	8.63913	4.21397	3.03704
Sec14l2	3.48025	4.76283	1.58689	1.43478
Sema3a	10.9179	10.7169	4.01104	5.8029
Sema3b	12.4787	11.0176	4.34166	5.44749
Sema3e	32.8243	36.7926	5.50958	6.39047
Sema4b	28.0729	25.1251	10.3343	10.2593
Serpina3g	3.92837	2.66133	0.689986	0.714891
Serpina9	21.9887	17.6833	0.179309	0.674299
Serpinb8	13.4002	12.5089	5.58194	7.14232
Serpini1	6.97284	6.97183	2.3118	2.98088
Sertad1	31.1604	35.007	8.20965	13.9493
Sesn3	28.7884	31.9812	10.7813	13.4575
Sfrp1	37.1544	35.9146	3.58931	3.26079
Sfxn3	32.1184	28.8453	9.82154	12.3618
Sgk1	85.3938	106.453	12.3756	13.2844
Sgpp1	26.852	23.8571	11.9325	13.024
Sh2d4a	15.7733	11.5024	4.92158	5.89263
Sh3d21	10.5477	10.5823	2.85476	3.35343
Sh3kbp1	4.47617	4.51507	1.14278	1.2279
Sh3rf1	27.1068	28.7603	12.4811	12.1175
Sh3tc2	2.26944	3.39304	1.2342	1.24753
Shisa2	14.5394	14.313	1.90276	2.02806
Sirpa	21.2085	21.7574	7.99276	6.32163
Skap2	68.5918	62.8262	17.9164	24.8786
Slc12a2	33.716	53.0614	6.89981	6.80283
Slc16a2	1.72171	1.23932	0.733567	0.66508
Slc16a7	18.3914	14.4495	2.92129	2.61575
Slc25a45	2.64082	2.1366	0.219195	0.618229
Slc27a1	91.6994	81.2631	39.1627	36.998
Slc27a6	0.906064	1.50446	0.451111	0.302949
Slc29a1	20.2201	19.6082	7.01067	5.27893
Slc2a9	3.66337	4.12263	1.01157	1.00147
Slc39a14	12.03	13.1168	6.53477	5.17348
Slc41a3	1.05341	1.13673	0.349683	0.281796
Slc47a1	1.61405	0.815424	0.296362	0.597076
Slc50a1	14.2931	14.0159	2.6613	2.2301
Slc6a17	2.44592	3.14896	1.07291	1.32103
Slc7a8	3.11414	3.1019	0.756867	0.914939
Slco2a1	7.74349	6.89226	0.189266	0.114397
Slco4a1	11.4035	9.58469	3.1924	2.6736
Slitrk6	3.57985	3.25856	1.43657	1.41099
Smad9	0.880904	1.32123	0.158327	0.11342
Smoc1	2.24187	2.33259	0.471601	0.626018
Smtn	19.946	21.0574	10.7333	8.13828
Snta1	4.73702	3.93894	2.15684	2.04038
Sntb1	22.3382	21.7576	7.08294	7.85755
Snx33	8.71965	8.91551	4.57702	3.72218
Snx7	10.5842	9.68502	2.25897	3.08549
Soat1	12.2157	8.45005	4.73463	4.18287
Socs3	29.6899	27.2171	9.0075	9.85142
Sorcs2	14.7122	14.8157	2.33943	1.67294
Sord	11.7789	11.5749	5.54592	5.70093
Sostdc1	236.2	229.09	47.3686	45.3227
Sox11	4.92878	5.81053	2.04408	2.19056
Sox2	5.14356	6.30976	0.678626	1.22245
Sox5	1.1709	1.32686	0.457486	0.589365
Sox7	8.12398	7.08693	2.36028	2.04478
Sox9	90.8204	95.622	37.2853	31.271
Sparcl1	2.27058	4.25057	1.05405	1.64892
Spock1	2.59476	2.83141	0.772516	0.556987
Spon2	1.3499	2.38361	0.706105	0.355639
Spsb1	4.8146	4.56339	2.12162	1.93945
Sqrdl	1.63906	1.40149	0.548669	0.607676
Srcin1	19.2637	17.4209	8.83136	8.96179
Ssfa2	170.675	174.616	39.6717	36.5221
Stard5	37.8481	31.6158	13.5156	16.6312
Stbd1	4.00372	5.12324	2.46131	1.45722
Steap3	1.08042	2.01427	0.52975	0.512295
Steap4	21.8102	19.543	4.18221	4.46081
Stfa1	70.4862	65.534	3.21405	2.30062
Stfa3	386.434	419.047	106.039	116.601
Stim1	30.9841	30.4681	14.5538	13.2083
Stom	36.0506	37.9455	6.31445	4.83842
Sv2a	2.10306	2.12415	0.926782	1.02206
Svil	50.7476	53.5214	24.58	23.1331
Syde1	2.71611	3.07874	1.23042	0.991586
Syn2	2.49953	2.86835	0.0744154	0.0799616
Sytl2	1.23998	1.98472	0.384775	0.553729
Tanc2	15.3008	15.414	5.80984	6.38613
Tbc1d4	16.9103	20.7407	3.5339	2.71133
Tbc1d8b	6.25322	7.13629	3.33178	3.16048
Tbx1	145.179	151.9	25.0607	19.0983
Tchh	2.6254	1.79837	0.938326	1.14735
Tcp11l2	7.96513	7.32691	3.06884	3.16554
Tenc1	20.0672	23.0812	9.97431	7.63239
Tex40	10.3996	12.0725	5.02764	5.71851
Tfap2e	10.897	11.8984	1.87359	1.58534
Tgfa	6.91113	5.92922	1.91404	2.64953
Tgfb2	151.027	164.308	75.9072	79.1931
Tgfb3	166.784	166.517	62.1988	51.0185
Tgfbi	37.7903	43.8469	4.2585	3.81314
Tgfbr2	8.05848	7.68899	2.76082	3.37686
Tgm5	15.9817	16.7842	3.74959	4.36121
Thbs1	43.8343	60.3802	15.6537	15.0235
Thsd1	1.8106	2.63165	0.708109	0.484209
Thy1	13.3245	15.0707	5.70478	5.25384
Timp2	24.8841	29.6474	11.249	11.0919
Timp3	99.8231	97.6646	11.9164	13.2294
Tinagl1	2.17853	3.37224	0.204392	0.329418
Tlcd2	13.5256	10.464	4.58705	6.93962
Tle2	5.63723	5.37439	1.36985	0.904756
Tlr3	1.08059	1.03469	0.439768	0.531615
Tlx3	2.78675	2.93842	0.668351	0.861713
Tmbim1	32.1818	32.5098	16.421	15.4672
Tmco4	5.74997	5.9463	2.23151	2.05526
Tmem106c	17.0731	13.8806	7.10291	6.85535
Tmem108	4.57029	4.15517	0.518867	0.79449
Tmem180	2.96564	2.6813	0.30265	0.209053
Tmem246	6.80164	6.52979	2.49963	2.30219
Tmem26	1.96245	2.0254	0.655501	0.694303
Tmem30b	10.4771	9.69463	4.57894	4.16321
Tmem40	14.7791	17.0701	4.59371	5.62418
Tmem51	9.91401	11.0695	4.81381	4.48261
Tmem53	6.85772	8.07743	3.58773	2.79749
Tmem63a	14.8452	15.4002	5.62507	4.55717
Tmem65	45.089	47.4156	17.9636	19.0762
Tmprss4	7.94374	10.3126	1.6096	2.10343
Tnc	26.4299	27.5006	9.54396	10.6811
Tnfrsf11b	11.539	9.79837	1.93083	1.0003
Tnfrsf18	20.8915	19.5817	8.92368	10.022
Tns1	11.6701	11.6041	1.88703	1.73162
Tns4	28.1408	24.6371	4.64592	4.78869
Tox	8.74222	10.5945	1.22556	1.15227
Tox3	19.0761	16.7222	4.74359	4.77241
Tpm2	9.29412	10.2647	2.74337	3.20179
Trabd2b	2.88149	3.23989	0.822914	0.708939
Trf	16.1552	14.7744	0.295399	0.408089
Tril	5.68786	7.04244	2.53811	2.13072
Trnp1	2.61603	2.14682	0.981944	0.69237
Trpc4	1.54265	0.899363	0.239496	0.19301
Trpv4	17.8455	18.0081	5.14083	3.70937
Trpv6	14.1805	16.5657	3.37704	3.62866
Tsc22d3	7.10256	5.95818	3.76055	2.44749
Tshz2	8.33632	7.6129	0.887898	0.834826
Tst	22.604	21.2245	8.52786	9.1619
Ttc39b	1.55024	1.51445	0.660118	0.600651
Ttpa	1.82078	1.71186	0.570184	0.357391
Txndc16	14.6284	14.3241	5.51949	6.10906
Uap1l1	2.61	3.11463	0.838963	1.15897
Ube2ql1	2.4929	2.14524	0.763133	0.527135
Ucp2	233.6	211.31	57.3103	48.4354
Ugp2	37.5953	34.243	16.622	16.6306
Ugt1a1	6.97397	5.07936	0.674407	0.638388
Unc79	1.76547	2.21244	0.294489	0.372956
Upk3bl	7.69829	4.97583	1.14307	1.84206
Vangl1	40.3746	37.1634	15.3682	17.0001
Vat1	29.9609	30.3771	14.7163	13.6687
Vcan	56.2908	55.3903	21.0819	25.6151
Vdr	53.8842	46.2396	8.49839	7.7116
Vsnl1	13.6342	14.3481	0.929121	1.33108
Vwa5b2	1.92602	2.35279	0.314715	0.507265
Wipi1	32.0984	30.5327	13.9428	14.6242
Wnt5a	25.6319	24.8532	2.87407	2.64621
Wnt7b	33.9626	32.8132	12.8057	14.8824
Wwc2	12.3138	12.8075	6.86542	5.63902
Wwp1	21.7946	26.2818	9.73183	11.513
Xdh	1.89991	1.40913	0.393234	0.333589
Ypel2	11.5201	11.7047	5.23605	5.51218
Zc3hav1	8.8993	8.25014	3.03188	2.67381
Zfp185	12.4326	13.5586	6.79922	5.56515
Zfp36	149.811	187.466	66.5481	78.346
Zfp365	7.67264	7.32172	3.82428	3.20816
Zfp608	7.07983	5.82695	3.03228	2.82831
Zfpm2	3.56494	4.28792	0.247418	0.214735

## Sheet: Sheet3
1300002E11Rik	7.66204	9.01113	15.4221	18.333
1700019G17Rik	1.02046	0.723885	2.0756	2.17957
1700058G18Rik	5.44539	4.16203	20.753	15.9711
1810058I24Rik	49.0467	45.8675	97.9657	99.533
2010107G23Rik	3.46129	2.97514	7.11997	7.52462
2010300C02Rik	7.36134	8.6473	58.9752	59.7971
2310003H01Rik	16.0903	18.0083	36.9292	34.9781
2610019F03Rik	2.87754	3.38418	9.39227	12.5722
2610307P16Rik	3.43128	4.04584	7.0552	8.62276
2610318N02Rik	2.15106	3.14671	7.62982	6.54899
4930452B06Rik	0.852558	0.849423	2.08691	2.39442
4930550C14Rik	0.552248	0.680262	2.38474	3.29415
5830473C10Rik	0.0408274	0.308394	0.969027	1.34883
5930412G12Rik	2.30853	2.32796	7.59376	7.63301
6030419C18Rik	1.11623	1.85296	4.07605	2.46354
6530402F18Rik	0.246734	0.244211	2.6354	2.1915
8430408G22Rik	2.93969	5.30879	14.9876	12.3961
9230110C19Rik	8.18792	6.84681	16.6482	18.4722
9930013L23Rik	0.427598	0.580573	1.92339	2.20836
A330021E22Rik	0.523254	0.594595	1.51492	1.38843
A730017C20Rik	14.7625	14.4351	29.698	35.6269
Abcc4	3.13186	3.02217	13.4581	12.4351
Abcc8	0.336855	0.478622	2.25611	1.47923
Abhd2	9.44693	9.56188	22.7523	22.1859
Abi3bp	3.48467	3.8608	21.2977	20.0265
Acaa1b	1.1824	0.789477	4.55706	3.62326
Ace2	0.573694	0.704714	2.33531	1.69143
Actn3	0.311553	0.134517	1.37786	0.649984
Adamts15	1.14888	0.986219	2.65254	2.76495
Adamts20	0.319993	0.476932	1.83388	1.92385
Adamtsl2	0.165399	0.416621	1.48667	1.67732
Adora2b	2.52266	2.55808	8.81937	6.8438
Aen	9.8638	9.93995	23.025	21.7651
Afap1l1	5.05619	5.54335	11.7264	11.2492
AI414108	0.813606	0.956655	2.35927	2.38848
Aif1	0.950749	0.639684	2.69613	4.13769
Aif1l	1.52095	1.8716	8.00605	7.35098
Ajap1	0.116904	0.0946458	14.1544	10.0095
Akna	1.039	0.932141	3.56819	2.80618
Alcam	85.401	86.7528	184.865	198.943
Aldh3b2	8.53442	6.32253	15.2544	14.6924
Alox12	0.240085	0.388738	2.71916	2.60873
Alox12e	12.9281	12.7138	45.083	33.203
Alpl	0.108185	0.194596	1.90619	1.1913
Ankrd35	0.436359	0.848056	1.62361	1.44121
Ankrd45	0.119224	0.12872	1.38875	1.20209
Ankrd6	2.79624	2.41975	5.518	5.44669
Anks6	0.400752	0.432655	2.32326	1.74167
Aph1c	0.371957	0.419925	1.38569	1.2049
Arg1	0.258057	0.278264	1.74074	2.01991
Arhgap22	1.3591	1.24118	3.45852	3.45362
Arhgef16	4.71819	4.26767	15.2687	12.9401
Arl4c	51.9889	49.7213	118.545	106.4
Ascl4	1.19314	1.10207	44.1669	52.7896
Aspg	0.594593	0.677423	2.63683	3.10129
Asprv1	38.2993	36.8238	86.2803	88.8212
Atp10b	0.352469	0.584605	1.56103	1.53155
Atp6v0a4	1.64657	1.75897	4.15757	4.37409
Atp8a1	1.59779	1.4958	4.61795	4.68026
B3gnt5	0.0774395	0.104525	1.04891	1.09872
B4galnt4	6.63525	7.62975	18.7637	17.2529
B4galt5	0.504207	0.748567	1.3821	1.53381
B4galt6	0.661855	0.909696	2.70891	2.32695
Bach2	10.4808	11.9259	25.2298	24.0633
Baiap2l2	0.266618	0.527398	1.19858	1.15906
Basp1	42.0054	39.2581	93.354	94.0576
Bbc3	2.2925	2.5743	9.23782	9.92573
Bcl3	0.101449	0.328316	2.2988	2.46996
Bcl6	15.8501	14.1758	53.8388	47.5473
Bdkrb2	0.335384	0.241161	2.59379	2.04155
Bex2	7.44369	9.37056	22.5144	22.725
Bex4	5.32806	4.40971	24.8024	21.6477
Bik	1.51929	1.05175	4.33694	3.02217
Birc3	4.45474	4.84293	10.06	12.9825
Bmp2	5.23115	5.56781	61.4132	81.0426
Bmp4	7.87549	6.49762	34.8389	28.3569
Bmpr1b	1.83836	2.74741	5.08009	6.47639
Bspry	2.36159	1.27368	6.13926	5.69399
C130021I20Rik	4.1608	4.2413	19.8052	17.0924
C1s	0.741449	0.900374	7.83706	9.22044
C430049B03Rik	0.269907	0.258976	0.902979	1.09124
C530008M17Rik	0.445471	0.563592	1.15287	1.12822
Cabp1	1.24831	1.70402	16.1727	16.941
Cacna1b	0.284633	0.238002	1.30754	1.34315
Cacna2d1	0.387176	0.493731	2.4523	2.40507
Cadm3	0.807312	1.10107	6.46132	6.3151
Cadm4	3.70511	3.53839	9.28128	7.10913
Calhm2	4.45277	4.27049	9.80254	8.4469
Calm4	60.0996	55.2584	137.74	145.752
Calml3	23.6911	22.7943	59.9064	54.8691
Card10	6.8443	7.71194	35.6421	32.2642
Cbx2	22.9485	23.9565	50.0901	47.03
Ccdc109b	1.3941	0.870072	7.36593	5.61633
Ccdc114	1.03747	0.719772	1.43897	2.51252
Ccdc116	0.48045	0.592845	1.13513	1.42656
Ccdc149	0.914993	0.639149	2.17699	1.45032
Ccdc8	14.3693	15.8902	49.6977	43.5909
Ccdc85a	0.0566251	0.0609416	1.15605	0.884919
Ccdc88c	3.33902	2.96265	6.93232	6.0685
Ccdc92	5.59386	5.2927	15.9182	15.2243
Ccnjl	1.29991	1.54693	3.88309	3.59289
Ccr10	1.14009	0.761271	3.98374	3.77675
Cd274	0.0977107	0.158237	2.29213	2.12324
Cd74	1.06751	2.11534	87.1206	75.5734
Cdc14b	2.54747	2.62999	6.59445	6.54011
Cdkn1c	8.91526	14.3068	38.2785	35.602
Cgnl1	23.565	24.0589	53.3365	50.5875
Chn1	0.792135	0.896091	2.1906	2.29324
Chn2	0.596773	0.490873	1.40984	1.5413
Chrd	0.49094	0.559429	1.32382	1.28022
Chst15	9.70663	10.1008	19.0841	20.5785
Cited4	0.928603	1.16774	3.09091	2.69256
Ckb	15.5361	15.1539	80.5004	58.9814
Cldn4	1.33801	1.38784	25.7103	30.2497
Cldn6	1.64123	1.76982	20.2339	19.1047
Cldn7	0.723868	1.03451	4.63836	5.26622
Cnn3	21.9437	20.492	67.2481	67.9804
Cntn2	0.335298	0.332802	1.30935	0.881993
Cntnap1	7.45019	7.51611	25.6003	23.6277
Cntnap4	0.217378	0.410782	4.37596	3.24323
Coch	0.32902	0.197268	2.14793	1.65265
Col11a1	0.465685	0.619025	2.66528	2.0131
Col26a1	0.934735	1.72952	5.8698	4.46916
Coro2b	0.443267	0.957119	1.59362	1.54114
Crabp1	3.51024	5.82082	15.1757	11.4622
Crmp1	0.665643	0.457238	1.795	1.26245
Csf1	1.11224	1.52559	7.13594	7.05656
Ctnnb1	553.642	563.991	1382.63	1458.97
Cux2	0.394517	0.426026	2.07176	1.99762
Cxcl1	0.969257	3.13132	6.16503	9.55977
Cxcl14	437.609	474.6	1425.89	1206.52
Cyb5rl	2.70475	4.62923	9.83551	11.7607
Cyba	18.0167	19.6869	43.6954	48.1733
Cybrd1	0.488073	0.508885	0.925632	1.17016
Cyfip2	6.13098	6.8615	59.6412	60.793
Cygb	6.73118	8.19299	22.1651	24.973
Cyp4f39	0.483911	0.895339	3.35579	3.4255
D130040H23Rik	0.415127	0.547414	1.0451	2.40628
Daam2	0.866182	1.69938	7.93947	5.77123
Dab1	0.252265	0.125067	1.98713	2.38697
Darc	0.425693	0.550484	3.40112	2.51832
Dclk3	1.52713	1.1266	3.29423	2.47781
Dcn	39.8258	56.945	322.366	419.547
Ddx25	1.00947	0.967822	3.75223	2.53598
Ddx58	1.68745	1.76464	5.49764	6.1133
Degs2	12.1612	13.5829	26.8875	25.098
Dennd1c	0.395837	0.155347	0.931666	1.06364
Dennd3	0.429834	0.535583	0.87358	1.32185
Derl3	0.505752	0.623115	3.50953	2.26238
Dgkh	0.0937176	0.0963806	1.12015	1.00864
Dkk4	0.294512	1.03182	56.6682	99.2673
Dnahc8	0.606708	0.699931	1.76558	1.56625
Dnajc6	0.857085	1.24784	7.15969	8.31099
Doc2b	2.8077	2.8295	9.37571	9.32739
Dock4	0.849037	0.917027	1.68036	1.96132
Dpf1	1.68479	2.16437	6.05873	4.185
Drp2	0.485615	0.497579	2.71224	2.22913
Duox1	0.648791	0.610796	1.32755	1.47471
Dusp18	0.626931	0.615422	1.3932	1.55209
Dusp6	40.821	73.377	251.653	265.623
E130008D07Rik	0.600037	0.356869	2.61023	3.31963
Ecscr	0.357388	0.866429	2.70124	3.73124
Edar	23.6535	25.9801	155.67	170.769
Ednra	0.341496	1.02706	2.36777	2.96827
Efha2	2.87027	3.60021	6.69297	8.64907
Eif4e3	4.33291	4.28656	11.9971	13.1838
Elovl2	0.369689	0.424089	1.56995	1.32547
Enc1	6.15454	8.02701	14.4741	17.5616
Entpd3	0.438734	0.278617	0.946413	1.88433
Epb4.1l2	8.1054	8.88615	42.6431	43.9206
Erg	0.165456	0.357077	0.892522	1.22272
Ern1	3.38412	3.3894	12.1259	12.1525
Etv4	13.4314	12.8512	26.537	35.3706
Etv5	9.11769	9.96932	26.4482	30.3284
Exoc3l4	1.78346	1.59318	5.27374	5.07863
Exoc6	1.28778	1.31868	4.06056	3.73159
Fabp5	209.937	203.695	563.578	574.432
Fads2	9.20245	9.6516	37.2785	23.1327
Fam107b	10.2646	11.1112	44.4397	40.0398
Fam124a	0.500203	0.540023	1.51059	1.26085
Fam13a	9.2503	8.78949	53.7385	54.3494
Fam174b	0.877276	1.16537	2.32944	1.87724
Fam184a	0.582833	0.750296	2.03083	2.14322
Fam187b	1.09955	1.55801	3.03454	2.93421
Fam19a5	1.14766	1.31371	3.93914	3.74887
Fam211a	2.3756	2.46251	6.73461	6.56111
Fam25c	0.820405	2.18901	13.806	13.6254
Fgd2	2.62236	3.46347	7.18428	6.53986
Fgd5	3.73306	4.7537	15.4652	14.0858
Fgf20	0.129127	0.765805	11.0795	20.6637
Figf	7.17928	6.196	29.0629	23.6785
Fjx1	8.05765	8.69578	26.5222	26.2606
Fkbp11	10.7697	11.2662	30.9346	25.9501
Fkbp1b	1.45072	2.00887	3.24554	4.8694
Fkbp5	17.8555	19.5235	48.5977	39.2087
Fkbp7	1.15139	2.47926	6.21887	7.41571
Fmn2	1.6905	1.86954	5.36673	4.32514
Fn1	43.5529	53.409	328.388	300.817
Foxi3	21.3638	26.5267	101.115	103.877
Foxp1	7.18484	8.39522	18.4901	21.7684
Fras1	10.3434	9.97426	36.808	32.5447
Frem1	3.22083	4.32176	50.7922	54.5951
Fsd1	0.74905	0.981112	5.71576	4.18725
Fut10	4.20768	3.3185	7.02887	8.77703
Fut2	0.351685	0.36092	1.86508	1.16262
Fzd10	30.7335	31.4238	113.646	132.142
Gad1	0.0829957	0.149326	5.22198	7.21428
Gadd45g	24.3825	24.4783	63.7269	64.286
Galnt12	1.94222	2.5417	15.2027	14.5147
Galnt14	1.80455	1.98725	9.73354	8.06808
Galnt16	1.67207	2.29323	6.5554	5.14551
Galnt4	2.31564	2.55616	6.03031	6.61898
Galnt6	0.644785	1.22641	6.88348	6.29386
Galnt7	1.58536	1.90932	4.75663	4.16903
Gata2	0.137788	0.356988	0.980881	1.34142
Gata6	1.31612	1.11848	3.17142	2.53146
Gbp6	0.0408849	0.15451	2.07238	1.88335
Gdf10	0.253183	0.624561	2.22402	1.76083
Gfpt2	0.661403	0.746397	1.16742	1.88161
Gfra2	0.617514	0.777768	1.27656	1.87862
Gfra4	0.536876	0.916747	9.51819	8.28869
Glipr2	0.41133	1.33138	3.15592	3.65586
Glis2	6.60714	7.42491	14.5436	13.8342
Glul	31.042	22.3837	61.7268	55.9976
Gm129	2.33914	2.52197	5.64368	5.02641
Gm14403	1.1481	1.39448	3.25045	2.99374
Gm1673	3.47517	2.02847	10.9586	7.72185
Gm5424	45.9781	41.0246	112.506	123.659
Gm8801	1.89139	3.91973	5.80028	6.31872
Golga7b	9.02884	8.09259	39.1169	38.3751
Gpc1	49.9438	54.7579	133.263	129.102
Gpc2	8.95468	6.54675	21.0338	23.103
Gpc3	78.2309	78.8521	212.323	220.265
Gpr173	1.05713	0.840875	2.25045	2.51488
Gpsm1	4.06827	4.69192	8.92714	8.74402
Gpx3	0.25045	0.337595	4.18964	1.63359
Gramd4	14.1197	14.6744	31.6938	31.5666
Grasp	39.4109	39.4557	80.9898	86.0648
Grb10	6.70498	8.00361	59.7417	58.0206
Greb1	2.43561	3.33074	8.57809	8.06161
Grhl3	5.02821	3.95665	26.5247	27.1849
Gria3	0.135069	0.145858	1.09244	1.438
Grik3	0.283778	0.739856	16.84	15.3405
Grtp1	1.4038	1.1947	4.30679	3.98452
Gsdma	1.09264	0.75048	2.96444	4.2023
Gsg1l	0.428859	0.633625	2.58042	2.04032
Gsta4	13.2036	12.2698	52.5581	50.5947
Gtf2ird1	53.1521	53.1043	102.956	109.579
Gxylt2	1.73394	2.14556	5.94316	5.49877
H19	142.547	137.789	378.921	377.386
H2-Ab1	4.19493	2.39344	36.5867	16.7439
H2-K1	7.66164	11.1618	32.4554	36.6944
H2-T10	0.778166	2.32525	3.31881	3.7638
Has3	18.0935	18.4712	162.956	157.553
Heg1	4.13759	5.24231	15.1117	15.0555
Herc3	3.0867	3.53386	6.51725	7.04615
Hhipl1	0.208493	0.337535	3.11125	2.29582
Hic1	0.138196	0.327663	3.13504	3.5974
Hif3a	6.70255	7.592	30.1013	26.9978
Hoxc4	8.01622	9.05092	19.1589	22.2065
Hoxc5	3.2728	3.92497	8.59419	7.75927
Hoxc9	0.381492	0.529059	2.11716	1.42174
Hs3st3a1	0.427836	0.437618	2.69569	3.36633
Hs6st2	0.308682	0.25636	1.28015	1.28018
Hspa2	2.46092	2.89783	21.4961	17.7587
Ica1l	0.219093	0.236539	1.15525	1.05797
Icam1	14.3566	17.7685	35.0967	41.4783
Id2	16.2752	15.7312	38.0255	38.5499
Id3	48.7541	49.1569	126.381	124.582
Ifitm1	0.783939	1.34872	23.7285	20.7549
Ifitm3	34.8284	42.8574	279.635	310.071
Ifngr2	21.0404	18.9102	37.7228	42.6207
Iglon5	0.388272	0.609527	1.75154	1.28878
Igsf9b	0.458225	0.449799	1.6398	1.55685
Ikzf2	0.642156	0.47562	0.979268	1.29145
Il23a	0.212593	0.381991	3.82458	4.19132
Il2rg	2.04804	3.21856	9.78804	12.4164
Ildr2	0.07342	0.0906286	16.5121	14.0367
Irak1bp1	2.25531	3.59656	6.57481	5.54178
Itga9	0.211124	0.621761	1.42379	1.18718
Itpr1	0.515846	0.566632	1.69692	1.88424
Jph4	0.412135	0.296678	1.0371	0.989315
Kalrn	2.02253	2.30178	6.97589	6.04583
Kcnd3	0.0466693	0.0654566	2.11255	0.905908
Kcnh2	1.65273	2.03301	8.73171	8.18244
Kcnh3	1.63813	1.68816	9.71746	8.11171
Kcnip1	0.121579	0.131823	14.0802	17.971
Kcnip2	3.30977	2.00471	7.8881	5.84072
Kcnk1	2.89012	2.60612	12.5572	13.699
Kcnmb4	16.793	17.5464	56.688	51.801
Kcnn1	0.56902	0.661637	3.5169	2.85329
Kcnn3	0.22786	0.221492	2.85014	2.4356
Kcnq4	2.23962	2.61202	12.0022	11.6192
Kctd12	10.229	13.1006	60.7609	55.6416
Khdrbs3	5.49097	5.50062	14.1771	11.6804
Klhl13	4.16198	5.06203	11.4324	12.0592
Klk13	0.681318	0.314542	2.94303	3.38763
Kremen2	15.4122	16.5829	204.175	217.116
Krt16	1.99561	1.95649	4.37266	3.89172
Krt27	0.800974	0.597994	1.4629	2.2505
Krt6a	0.323972	0.393297	4.45633	3.52077
Krt7	6.61365	7.77517	19.9977	18.2391
L1cam	1.78929	2.03958	4.7346	3.91645
Lama4	2.30943	3.41377	5.65007	6.52289
Laptm4b	13.4023	8.91795	23.2223	23.6471
Lbh	19.6624	19.7111	64.76	62.8809
Lef1	8.44271	7.7009	83.4398	86.521
Lgi2	1.53866	1.55623	7.62651	7.85994
Lhpp	4.28639	4.36954	14.5744	13.8891
Limch1	1.30243	1.78799	23.1993	22.9685
Lmo2	0.24999	0.743026	1.50519	1.84853
Lmx1a	0.106935	0.0865812	3.43133	1.95196
Lor	0.419832	0.452873	11.1558	5.476
Lrp3	6.13919	4.34611	11.5689	10.5938
Lrp4	31.5733	34.7106	154.138	163.961
Lrrc42	47.8053	45.537	108.629	107.859
Lrrc55	0.744179	0.702864	1.70578	1.34771
Lrrc56	7.54863	7.49571	16.5744	15.6008
Lrrk2	0.484268	0.545792	0.930842	1.28081
Ltb4r1	0.413795	0.594848	2.67984	2.39937
Ltb4r2	0.797175	0.931174	3.44165	2.77332
Ly6g6e	3.30482	3.74858	19.4375	16.0405
Mafa	2.58602	1.8906	5.78429	4.33931
Maff	5.43973	8.55045	23.9822	18.4699
Magi3	3.03453	3.91779	11.7002	11.3178
Man1a	6.74388	6.27269	33.1725	35.4864
Map1b	4.5196	6.51463	11.2114	11.8833
Map2	1.87035	2.25945	5.45263	4.93158
Map4k1	1.94158	2.27625	4.73047	4.71429
Mapk11	1.74986	1.96882	6.58694	6.27923
Mapk4	0.438718	0.741489	10.9438	12.0358
Marveld3	2.29533	2.0135	5.5785	7.06891
Matk	0.323877	0.640475	1.28148	1.68981
Mef2a	22.6958	24.8695	51.2926	60.9015
Meis3	5.29711	4.07334	10.7527	11.9485
Metrnl	2.02464	1.94666	5.8773	5.18437
Mfsd2a	7.85579	9.81256	25.3344	24.7218
Mgarp	0.63527	0.599754	3.25049	3.03685
Mill1	4.34108	4.8425	16.607	14.6517
Mlec	83.7259	91.2434	359.598	343.473
Mme	5.80969	4.90147	37.1895	28.9576
Mpp3	0.411048	0.273034	1.29606	1.48425
Mpped1	4.41956	5.80821	62.1775	61.4183
Mpped2	0.441445	0.659709	3.9742	3.01101
Msi1	12.8883	13.1743	31.2466	29.4289
Msx2	6.57798	7.28102	17.1698	16.2348
Murc	0.225484	0.340599	1.1191	1.1763
Mybpc1	0.158085	0.558292	10.8477	16.8894
Mycl1	10.0851	9.95302	60.2381	57.7321
Mylip	11.5568	11.6951	31.5538	32.8062
Myo5b	0.366705	0.311176	1.42638	1.02434
N4bp2l1	3.163	2.25738	7.29827	6.17747
Nap1l5	0.489983	0.687181	4.44102	4.60128
Nbeal2	1.31717	1.39083	3.43408	2.81886
Nceh1	0.561844	0.671662	1.53646	1.08128
Ncf1	0.0995245	0.286455	0.96622	1.44195
Nell2	0.185444	0.0571992	5.37188	2.80934
Nes	3.1044	3.38339	7.63202	5.6186
Nfasc	0.442639	0.597112	0.912224	1.17475
Nfe2l3	2.70849	2.7693	11.6487	12.5785
Nfkbia	52.2122	62.5077	178.801	197.455
Nfkbie	0.751538	1.09492	2.5944	1.82941
Ngf	1.32174	1.32223	8.25789	10.5311
Nhlrc1	2.18973	1.84742	3.69386	4.70742
Nin	20.8592	20.7062	56.3085	62.6274
Nkd1	4.43815	5.91841	18.4984	19.6602
Nnat	4.34886	5.84339	150.765	135.052
Notch3	4.2244	4.84562	15.8783	13.8496
Notum	1.3711	1.18345	17.752	16.3719
Nptx2	4.86812	4.18016	32.5056	31.2614
Nr2e3	0.184802	0.199384	1.1465	1.28544
Nr3c2	0.151442	0.210233	2.49661	3.30948
Nrp2	63.2956	62.7932	154.708	137.255
Nsmaf	8.17603	9.12833	16.7604	17.9653
Ntng1	0.87577	0.86074	2.20597	2.10214
Ntng2	0.296452	0.191833	6.73622	4.82312
Nup210	15.0638	16.2693	37.5774	42.3552
Nupr1	2.55312	1.95939	5.1279	6.99079
Ocln	1.0648	0.756225	2.47836	2.19214
Ogdhl	5.76041	5.187	15.3514	13.9658
Olfm1	3.48378	2.71696	22.3179	17.6974
Optn	1.28215	1.34299	2.07476	3.21283
Osbpl3	4.41426	4.05568	13.0956	10.7307
P4ha2	8.37839	8.25326	23.856	17.9776
Padi3	0.262944	0.28384	3.71858	3.9618
Padi4	0.239809	1.0353	2.62384	4.40767
Pak6	3.28991	4.28538	8.77603	11.3563
Paqr8	0.658131	0.667565	2.38741	2.28802
Parm1	16.9925	17.1439	53.4287	47.3537
Pcdh19	1.71494	1.61868	6.04667	6.90369
Pcdh7	1.89847	1.9763	3.77615	5.37445
Pcsk5	1.39988	1.74737	3.19741	3.17767
Pcyt1b	1.7298	2.12085	4.39161	4.51018
Pde4b	4.62877	4.94099	13.7617	13.1589
Pde4d	2.91044	3.23659	16.0909	15.5401
Pde5a	3.25965	3.04546	6.68125	7.48665
Pde9a	3.88334	4.86358	9.15353	9.77823
Pdgfa	187.965	183.588	430.257	403.466
Pdgfc	13.1545	15.515	28.0206	31.9888
Pdpn	2.48184	1.93665	11.5671	10.561
Pdzrn3	13.8656	15.4592	52.2923	40.0091
Pdzrn4	0.105114	0.0567381	1.33216	1.27916
Pfn2	33.1171	29.0283	126.317	109.061
Phc1	5.81563	6.43092	27.4129	26.3367
Pkp2	0.311096	0.369379	2.08054	1.29806
Pkp4	32.7812	34.3303	91.8192	95.1829
Pla2g4f	0.458469	0.587707	2.00897	0.797047
Plcb4	0.793788	0.597306	3.45047	2.92707
Pld5	0.0546866	0.177114	1.26261	0.822692
Plekhh1	0.257079	0.32148	1.70709	1.45808
Plgrkt	18.7863	19.6847	112.641	128.659
Plk3	7.4298	8.18413	27.4514	28.1799
Plxna4	0.273437	0.457822	1.09822	1.093
Plxnc1	1.07354	1.50595	2.54144	2.85246
Pnck	0.575808	1.10385	2.07233	2.11444
Pnmal2	1.17199	1.49552	3.70002	3.03741
Pnpla3	0.813816	0.756147	3.91883	3.02662
Poc1b	7.01662	6.03722	14.5665	14.8462
Ppm1j	0.54464	0.528721	2.17458	1.61027
Ppp1r36	1.24853	1.41709	3.90081	3.31477
Ppp1r9a	0.86885	0.987354	1.73707	2.18643
Prickle1	4.9352	6.21673	11.3222	11.702
Prkaa2	1.18334	1.11834	2.41525	3.23193
Prkar1b	4.46801	5.00779	10.826	9.79998
Prkcz	2.21075	1.94088	4.70163	4.27391
Prnd	0.309793	0.308345	1.04229	1.66221
Prokr2	0.0971401	0.167826	2.47236	3.84989
Prom1	1.78495	2.78459	6.50264	7.98151
Proser2	1.31594	1.51994	6.13851	5.737
Prr5l	0.287582	0.221797	1.60945	1.77508
Prss23	3.43608	4.15802	8.06991	11.1763
Prss35	24.9886	26.1927	58.8392	48.2608
Pstpip2	1.17217	1.39573	5.18915	4.1466
Ptch2	85.486	84.0093	373.078	371.697
Ptges	1.9979	3.18287	16.9758	16.5185
Ptk2b	7.26167	8.17245	21.5739	21.9271
Ptprd	2.97169	3.73438	7.28581	7.99279
Pvrl3	7.21001	8.62041	25.5903	27.8477
Pvrl4	10.877	10.2855	20.7286	22.0101
Pxdn	26.4983	26.2013	53.0742	53.6527
Rab11fip4	4.72474	5.28468	10.7143	10.0942
Rab31	2.51087	2.87666	5.08467	5.83477
Rap1gap2	1.07387	1.23316	2.85835	2.74068
Rarb	0.520034	0.420978	2.06854	2.0908
Rasgrp4	0.632409	0.682876	1.62442	2.08139
Rasl11b	12.0999	16.0728	41.7358	33.5404
Rassf8	2.86273	3.43746	6.12004	7.32717
Rassf9	13.1045	12.782	39.3254	35.916
Rbm38	6.68548	6.70054	21.8695	21.4226
Rbpms	1.99592	3.4428	10.0797	8.64656
Relb	3.99821	3.99971	24.1288	23.6085
Rgag1	1.81765	1.31607	5.44275	4.53501
Rgl1	2.82665	2.90421	7.47396	7.56869
Rgs2	6.7992	11.7817	32.5202	31.8845
Rgs9	1.74706	1.58812	4.8183	4.75496
Rhbdl2	2.97427	3.03233	7.02945	5.45442
Rhov	3.00808	4.16262	8.69727	7.30465
Rhpn1	1.07901	1.25062	3.40598	2.15411
Rhpn2	1.03641	0.867135	4.77878	5.49525
Rimklb	0.132163	0.0475659	3.84854	3.59931
Rltpr	0.652432	0.782365	3.2454	2.52084
Rnf157	0.982836	1.18373	2.75175	2.39835
Rnf180	1.03123	1.34111	4.27189	4.72608
Rnf182	0.515532	0.556559	2.36316	2.50939
Rnf32	1.97394	2.32021	13.2727	13.8952
Rnft2	2.39492	2.01616	4.99884	4.74791
Robo1	32.077	31.7836	90.596	87.2651
Ror2	0.780464	1.6131	3.0543	2.44207
Rprm	0.32679	0.704739	8.46496	5.11588
Rrad	0.240183	0.323781	3.43449	4.07307
Rragd	0.903998	1.53938	15.4669	16.4084
Rspo1	0.406037	0.602271	3.17643	2.2949
Rtn1	0.368078	0.541226	2.32166	2.01977
Runx2	0.61843	0.524239	5.82529	8.44296
Rwdd2a	0.330271	0.622902	1.69379	1.29297
Samhd1	10.6387	11.5023	24.0036	23.5574
Scamp5	1.42955	1.96683	4.23274	3.50858
Scube1	1.73645	1.78597	53.2563	54.9974
Scube3	6.80405	7.60454	36.8259	34.4927
Sdk1	1.84093	1.9774	4.41972	4.24253
Sel1l3	0.878479	1.53879	7.41077	6.92253
Sema3d	3.28559	4.18309	9.54876	12.5357
Sema4d	6.36637	6.19984	12.5151	13.1678
Sema5b	0.618444	0.56345	3.12638	2.48597
Sema6d	1.07737	1.59867	17.5809	20.6798
Serpina3h	4.94229	7.36851	75.962	48.987
Serpina3i	1.83882	2.61552	14.0673	10.7549
Serpina3j	0.277203	0.348922	1.44559	1.6068
Serpinb10	1.4636	1.90043	3.21859	6.33623
Serpinb6b	0.45007	0.755264	1.40295	1.73931
Serpine2	7.62196	8.32048	16.2535	18.0097
Sfrp5	0.195317	0.368746	2.26553	1.61338
Sfxn4	0.793099	0.535015	1.28328	1.78106
Sfxn5	1.43463	1.75889	6.18925	4.39611
Sh2b2	1.95965	1.19408	4.29586	3.84661
Sh2d3c	0.623299	0.335611	1.4801	0.721188
Sh3bp5	5.25268	5.86701	14.2256	12.8371
Sh3gl3	1.0083	0.797249	6.96509	8.30187
Sh3rf2	4.15239	5.0989	19.982	21.3021
Shc2	1.18589	1.13545	3.71632	2.99498
Shh	10.3702	11.595	142.135	142.884
Siglec15	0.0977792	0.631971	12.7767	10.7202
Sipa1l2	3.6831	4.37693	16.4329	15.0641
Six4	0.0627924	0.237337	1.86214	2.15559
Slain1	0.461027	0.426521	1.17223	1.20232
Slc12a5	0.608602	0.657263	2.50016	2.54383
Slc14a1	0.298027	0.706594	33.3264	36.497
Slc22a23	1.38086	1.25028	4.31675	3.83047
Slc25a33	6.18543	6.45931	13.5085	12.994
Slc2a13	0.439368	0.488894	2.46944	2.59184
Slc2a4	4.3725	4.16839	10.9823	11.0422
Slc35d1	7.21215	5.73797	14.7543	14.8087
Slc35f2	0.705656	0.456955	1.44633	1.41094
Slc38a1	2.12447	3.09818	12.8321	11.6578
Slc39a11	6.50222	6.83906	13.919	14.0157
Slc40a1	8.89175	7.12106	73.5934	71.6469
Slc43a1	1.20181	1.24831	10.7698	10.0962
Slc4a11	10.8679	10.8876	41.9471	32.979
Slc8a2	2.27252	2.90397	32.4908	26.4562
Smtnl2	2.48262	2.53062	12.0886	12.4696
Snai3	1.2486	0.833598	4.68413	4.34336
Sncaip	4.0325	4.85364	13.9082	13.7549
Snx10	1.36144	1.15161	3.4534	2.87896
Soga2	2.17778	2.65097	8.78356	8.2813
Sox21	11.2127	12.4842	53.8649	57.9471
Sox4	73.0665	80.5446	175.707	167.063
Sox6	2.07775	2.44229	9.23665	8.69638
Sp5	1.35975	1.0412	15.6642	14.6443
Sp6	0.660651	1.42643	10.546	11.1634
Spo11	5.03619	4.08673	14.2236	17.3866
Spred3	2.24609	2.18969	5.31518	6.02723
Spry1	8.7149	11.8059	37.6842	33.4118
Spry2	20.6343	27.3542	49.3298	46.7678
Spry4	1.16986	1.94659	5.95656	4.40039
Sstr1	0.526843	0.494627	1.60581	0.955657
Sstr2	0.268323	0.31168	3.1612	2.64575
St6gal1	3.36299	4.81563	18.2148	20.4315
Ston2	6.78889	8.26611	22.2803	26.5553
Stx11	0.385024	0.369053	2.83469	4.32363
Stxbp6	8.11852	7.90706	32.7564	30.1748
Sult4a1	0.305754	0.371206	2.47386	1.72779
Susd4	4.48602	4.93791	28.4051	27.0272
Sv2b	0.296592	0.391462	7.71382	8.28011
Svopl	0.115541	0.374064	1.08027	1.07145
Syk	2.82081	2.37726	6.32428	5.59126
Syne4	1.85019	1.91794	3.61018	4.45647
Synm	0.512851	0.595404	1.22685	1.36071
Synpo	10.3812	11.6869	25.2898	20.8394
Syt5	0.961853	0.8646	5.99688	5.20423
Syt7	2.83172	3.37961	14.8071	11.835
Sytl4	0.977366	0.977999	3.85655	3.2323
Tacstd2	19.334	21.998	49.8994	54.1671
Tagln3	1.44014	1.27807	3.29267	3.39013
Tango6	4.03899	4.90095	10.0919	10.01
Tcp11l1	1.34333	1.55971	2.73372	3.569
Tekt5	1.97774	1.72188	4.68055	4.63173
Tenm3	6.49207	7.43008	33.1713	30.8466
Tenm4	4.38048	5.82694	18.2719	17.2424
Tex15	0.988835	0.756524	2.05474	1.98715
Tfap2b	33.8798	37.5863	85.1955	90.5242
Tfrc	30.2019	23.6398	55.177	58.9588
Tgm1	0.688055	1.02558	1.80253	2.10774
Thbs3	1.54575	2.09339	3.97112	3.7133
Them6	0.767758	0.965871	2.00252	2.78217
Thsd4	2.15768	2.64028	11.3252	9.68348
Thsd7b	0.334645	0.527052	2.85684	2.61744
Tjp1	19.666	21.1624	62.1058	63.0932
Tjp3	1.47963	1.40553	5.42636	5.76209
Tll1	5.09608	6.36883	13.9891	14.8358
Tmc7	2.50974	3.13342	4.77892	6.5439
Tmeff1	8.1536	8.35742	21.8092	24.7285
Tmem100	2.59552	1.82841	5.48722	9.6727
Tmem125	1.34783	0.969345	3.12413	2.34393
Tmem151b	1.17721	1.56455	15.8399	11.0498
Tmem181c-ps	8.15694	6.63487	20.0473	20.8319
Tmem35	0.72494	0.469255	2.65949	2.18516
Tmem50b	6.34536	7.15833	15.0251	12.8962
Tmod2	0.331714	0.367729	0.960103	1.04685
Tnf	1.63169	4.46233	22.1996	35.4741
Tnfaip3	2.98424	5.6026	32.6374	41.2691
Tnfrsf19	30.0229	38.2272	171.21	169.232
Tnfrsf21	6.42221	6.3249	22.5248	22.1582
Tnik	3.37284	3.79002	17.5185	16.5457
Tnip1	16.1056	15.1647	32.8149	31.1166
Traf3	13.4761	13.8005	33.2422	32.3928
Tram1l1	0.78211	0.799536	2.30931	2.14729
Trib1	13.735	20.2634	43.3019	42.7855
Trim46	0.331746	0.557372	2.38658	0.808998
Tro	0.447787	0.469368	1.40598	1.19286
Tsku	10.1007	11.5603	29.0416	26.306
Tspan15	0.665865	0.61238	7.82006	6.77373
Tspan5	17.9116	18.0262	49.5314	52.7156
Tspan6	10.5476	10.5199	27.9108	25.6256
Tspyl5	0.441461	0.428982	1.16648	1.38133
Ttc28	3.18781	4.22793	9.17173	7.84059
Tubb2b	6.99184	8.79159	37.4084	41.0884
Uchl1	1.20523	1.57704	15.8941	15.4284
Unc13b	3.72534	4.36819	10.1137	9.36745
Usp13	0.45051	0.324311	1.23486	1.30516
Vcam1	0.288622	0.453216	1.2169	1.6877
Vsig10	1.04726	1.1543	2.68249	2.65486
Vstm4	0.328922	0.781047	1.80953	1.14373
Wfdc2	3.56661	3.00152	5.53172	8.64297
Whrn	4.18771	4.66515	16.9249	14.8683
Wif1	5.79471	9.33544	100.73	102.036
Wipf1	1.30336	1.9053	3.41675	3.38096
Wnt10b	12.5778	16.0119	198.622	197.978
Wnt2b	1.12018	0.940613	3.86616	3.98119
Wnt3	7.13032	9.0006	39.9433	45.3856
Wnt7a	1.2113	1.6421	7.86954	8.52125
Ypel1	3.12781	2.75207	7.81164	9.16204
Zbtb10	1.43383	1.64933	3.64531	3.48487
Zcchc18	0.50951	0.666684	1.84206	1.89554
Zcchc5	0.396299	0.526492	1.97294	2.43794
Zdbf2	0.602368	0.695049	1.88208	1.82889
Zdhhc14	0.862539	1.05524	4.31065	4.19866
Zdhhc2	6.5774	4.47091	22.3841	22.5563
Zfp105	0.783278	1.04393	2.93305	1.92293
Zfp184	1.83753	2.23572	5.76631	5.46015
Zfp462	6.22218	7.17377	14.6145	16.3567
Zfp534	0.343085	0.43766	1.0093	1.19295
Zfp566	5.49049	4.24713	20.9467	20.6412
Zfp57	3.73612	3.62706	12.4366	12.3595
Zfp618	7.02775	7.99211	15.2628	15.4364
Zfp647	2.56496	2.94731	5.2238	5.82875
Zfp750	14.826	15.9752	38.2543	41.3445
Zfp82	3.71507	3.28157	8.95021	8.07301
Zfyve28	0.177925	0.0240132	2.78245	2.16505
Zkscan2	1.34672	1.16335	2.48977	2.9429

## Sheet: Sheet4
	Figure 3-source data 1. RNA-seq results of differentially expressed genes between Nfatc1+ and Shh+ cells. N=2.
		Nfatc1-1	Nfatc1-2	Shh-1	Shh-2
	1190005I06Rik	7.99439	5.73228	0.960082	0.515658
	1600029D21Rik	12.9007	10.5464	3.20818	4.38184
	1810011O10Rik	26.1212	24.2486	7.83231	8.83576
	2610203C20Rik	28.3906	25.5975	9.81707	10.1411
	2900011O08Rik	2.43853	2.29739	0.334059	0.201905
	2900041M22Rik	1.36348	2.08883	0.38731	0.49935
	4921531C22Rik	1.26592	1.1556	0.315214	0.423357
	4930451G09Rik	3.1348	2.75196	1.71507	1.00494
	4930556M19Rik	2.41104	1.8943	0.836412	0.244382
	4933431E20Rik	4.82515	4.30143	1.20481	1.43535
	5430435G22Rik	20.1706	23.6317	5.97313	5.25117
	5730559C18Rik	8.96356	10.2865	4.14364	4.71125
	6430571L13Rik	6.0382	5.86511	1.49432	1.91442
	9430076C15Rik	1.15491	1.31061	0.415246	0.669281
	A730056A06Rik	4.39412	3.93683	0.781922	0.525086
	A930004D18Rik	2.18983	2.36529	0.448475	0.722841
	Abca1	16.0661	17.5811	6.8114	6.44705
	Abca12	5.83867	5.86789	0.8529	0.72355
	Abcb9	2.2217	2.10946	0.375323	0.232669
	Abtb2	7.41795	7.17551	3.60412	2.98852
	Acacb	2.03081	1.34474	0.825296	0.798151
	Acadl	35.7813	32.9127	7.17796	8.51125
	Ace	3.81293	3.76942	1.9498	1.49357
	Acer1	2.80833	2.8691	0.282762	0.260422
	Acer3	25.3482	24.4272	11.4476	10.9116
	Acot1	108.546	104.409	45.4544	51.903
	Acpp	12.8836	12.9668	3.17552	3.25004
	Acsbg1	12.7685	9.85414	1.08644	1.12973
	Acsl1	16.0081	15.9806	7.98168	7.4814
	Acss2	6.07088	4.49433	2.36571	2.32093
	Ada	4.35093	4.04309	1.78493	1.72491
	Adamts19	27.2448	33.2875	3.98537	4.16228
	Adamts9	12.7524	14.8962	4.24087	3.14134
	Adamtsl1	16.3963	19.1908	6.83581	7.36473
	Adcy7	28.3682	20.0111	9.92757	9.43215
	Adh7	1.63815	1.09872	0.382145	0.153977
	Adrb2	4.96754	11.2746	0.462019	0.595715
	Aebp1	6.83779	8.27917	2.1676	1.25319
	Aff1	8.35732	10.062	3.24327	2.87611
	Agl	14.1191	16.1523	6.48451	7.90925
	Ahr	21.3909	19.6085	3.67571	5.56469
	AI464131	24.2075	22.5963	9.79027	8.90153
	Aim1	42.8535	44.4628	14.8097	14.2248
	Ak1	11.3907	9.68798	1.7307	2.21687
	Akap2	9.0442	10.7672	4.47239	5.00446
	Akr1b3	22.6321	14.7791	9.35333	6.01932
	Alad	27.4885	25.6754	5.92541	5.90587
	Aldh1a7	4.33755	3.1361	0.868432	0.544312
	Aldh1l1	7.64176	8.24908	2.63263	3.33394
	Aldh1l2	2.74992	3.42307	0.842798	0.754693
	Aldh3a1	6.87764	3.76746	0.575072	0.411912
	Aldh4a1	68.4199	64.3323	26.3867	27.7367
	Aldh6a1	21.9673	22.5046	9.93233	9.46604
	Ampd3	11.933	11.54	6.23978	5.49203
	Angel1	11.3509	14.3185	5.38855	5.32321
	Angptl2	29.4151	29.6333	12.1938	13.2225
	Ank	104.366	102.115	28.0727	24.2617
	Antxr2	2.27126	2.04348	0.612406	0.863688
	Anxa6	58.8918	64.5721	28.9177	30.3102
	Anxa8	34.224	24.5243	5.09911	7.95865
	Aox4	4.81996	4.17531	1.46609	1.10481
	Apba1	0.945142	1.09164	0.0707764	0.182528
	Apobec3	2.21735	1.75038	0.55814	1.28511
	Apoc1	82.9237	55.7187	18.5987	22.4357
	Apoe	866.339	609.602	51.9582	47.1515
	Apol8	1.21521	2.021	0.218541	0.17611
	Aqp1	2.51614	3.13905	1.19846	0.852188
	Arap1	19.1862	20.7187	7.638	7.88402
	Arc	15.9177	48.5798	8.18829	8.40934
	Arhgap18	9.6366	10.802	3.23473	3.80343
	Arhgap25	7.48268	6.42909	3.29152	2.90516
	Arhgap28	5.85067	7.63508	2.45265	1.86203
	Arhgap31	1.90991	2.24484	0.763212	0.800592
	Arhgef10	28.3537	29.5504	15.0973	12.5716
	Arid5a	3.70403	4.80558	1.25342	1.26551
	Arl4d	2.85074	5.02254	1.72615	2.05617
	Arpc1b	54.2406	53.7512	19.3149	18.3798
	Arsb	2.97324	3.97682	1.55546	1.34997
	Art4	14.364	15.7073	6.34672	6.17739
	Artn	1.89553	2.27262	1.18158	0.878942
	Atf5	62.5931	55.3305	31.794	26.0979
	Atoh1	6.20709	7.21981	0.237478	0.229648
	Atp1a1	440.244	433.534	165.362	160.326
	Atp1b3	115.115	103.886	47.348	51.7281
	Atp6v1b1	70.586	69.5634	23.9171	18.4792
	Atp8a2	1.59073	1.66537	0.10398	0.125695
	Atp8b1	6.2095	5.888	2.43622	2.89218
	Avil	0.975874	1.34071	0.191385	0.154234
	Barx2	249.108	253.712	62.1135	49.5553
	BC016579	6.73173	6.54201	0.811974	0.799745
	BC100530	397.111	469.808	87.8421	91.8589
	BC117090	24.6992	25.9873	6.90298	8.50077
	Bcas1	2.61697	2.98907	0.196934	0.370316
	Bgn	87.8964	90.2485	41.5312	35.7219
	Bmp1	65.6806	64.0132	28.262	28.4598
	Boc	49.6654	53.0472	16.1653	16.8512
	Bre	36.3966	34.4173	15.2196	19.5962
	Btbd3	34.5825	34.6199	15.9611	17.344
	C1qtnf1	1.61903	2.64653	0.618933	0.463161
	C920025E04Rik	6.39697	6.00324	2.35599	2.48761
	Cables1	10.3375	9.12314	4.07367	3.24816
	Capn1	55.5364	57.049	23.4586	25.3249
	Car13	18.8274	19.8884	4.32799	4.00576
	Casp1	7.5357	7.99076	0.338874	0.109228
	Casp14	3.52213	4.13873	1.73099	1.29288
	Cav2	44.5192	37.3427	17.5938	18.6489
	Cbr3	21.9382	28.7337	8.19893	7.63416
	Cbs	19.5954	22.6594	7.83009	6.12357
	Ccdc164	1.08925	1.00128	0.174094	0.210443
	Ccdc3	31.5287	35.5343	15.2993	14.0147
	Ccdc80	1.46146	1.78821	0.446603	0.719831
	Ccl27a	37.0262	32.8182	13.2848	12.8935
	Ccnb1ip1	3.59274	1.69923	0.884345	0.877071
	Cd109	63.0747	54.9984	8.26744	9.15979
	Cd248	1.80392	4.12286	1.41179	1.47596
	Cd34	1.45729	2.34867	0.819306	0.769047
	Cd36	1.62511	1.49777	0.334222	0.683983
	Cd44	183.24	178.653	26.2269	28.3361
	Cd59a	14.8737	13.1337	4.96091	5.92431
	Cdc42ep3	38.3672	39.6182	4.46437	5.06937
	Cdh13	12.1659	10.2875	1.07582	0.832282
	Cdhr1	1.2506	1.85949	0.552762	0.748393
	Cdkn1a	44.0231	42.8448	22.421	18.3967
	Cdkn2c	21.0177	16.5489	4.46124	5.62649
	Cdo1	2.54275	2.80894	1.47252	0.970844
	Cebpb	106.206	98.6433	38.1401	29.5794
	Chchd10	8.30306	6.50281	1.74704	1.87685
	Chdh	48.5792	46.0087	21.581	19.0655
	Chl1	3.55902	2.79231	1.36371	1.34219
	Chmp4c	3.54449	3.71103	0.95618	0.634552
	Chrm1	1.366	1.74949	0.807571	0.482101
	Chst3	2.39801	2.60517	0.446377	0.669864
	Cib2	32.7517	29.8317	14.0322	14.1312
	Cish	15.7526	14.7984	1.19104	1.47663
	Cited2	26.6771	33.2405	13.0236	10.9442
	Ckmt1	82.4673	74.575	33.3023	26.1636
	Clca1	2.52328	2.85193	0.928585	1.03218
	Clca2	10.0181	11.9972	4.32723	4.43838
	Cltb	55.743	50.9273	21.0457	22.3338
	Cma1	5.84396	6.69588	2.70447	2.90552
	Cnp	4.8598	6.30055	2.06684	2.71934
	Cntfr	166.833	161.093	63.6906	56.7246
	Cobll1	21.8819	21.635	7.93855	8.46119
	Col12a1	20.5688	27.246	3.36969	3.89062
	Col14a1	89.1868	85.4497	27.3908	27.1472
	Col15a1	1.33391	2.70311	0.657084	0.830107
	Col16a1	76.5231	78.2175	6.60909	7.69684
	Col17a1	310.352	316.706	125.81	127.321
	Col23a1	0.864242	1.13331	0.349493	0.321898
	Col25a1	3.83637	3.88143	0.542178	0.486137
	Col3a1	75.6826	160.066	59.0665	52.9037
	Col4a6	12.3089	12.0774	4.91389	5.21197
	Col5a3	0.874525	1.22314	0.0772992	0.274105
	Col8a1	8.15257	8.17353	1.29564	1.79
	Col9a3	42.7017	45.1698	3.07076	3.18957
	Copz2	21.4364	22.6065	8.23535	5.19292
	Cpd	22.8455	23.3288	10.6358	11.3468
	Cpeb2	8.32976	9.13503	3.43393	3.85963
	Cpm	5.43328	4.75577	0.891629	0.879886
	Cpsf4l	20.5216	24.1854	10.0643	11.8387
	Cpt1a	10.1967	10.8327	1.37184	2.53212
	Cpxm1	38.7042	41.6476	16.134	14.7006
	Cpxm2	1.59966	1.50768	0.575111	0.441407
	Crabp2	7.11933	7.41774	1.61253	1.79894
	Creb3l4	8.47818	7.03816	3.75211	3.81919
	Creb5	17.4744	18.3886	8.71519	7.45896
	Crim1	46.8252	52.2986	19.0924	19.8157
	Crip1	27.8359	29.4881	6.41773	6.71902
	Crtac1	4.25496	3.5096	0.298535	0.360873
	Cryab	2.98424	3.66279	0.894969	0.865375
	Csta	1.02442	1.24837	0.21388	0.45963
	Ctsb	103.404	98.6061	47.4805	46.4656
	Ctsc	22.1223	21.4159	7.69069	7.66726
	Cwh43	41.5985	24.3889	10.231	10.9932
	Cxcr4	51.9335	54.0831	12.4715	18.4921
	Cxxc4	1.26083	1.26074	0.436432	0.270559
	Cyp17a1	1.76901	0.817864	0.327227	0.439489
	Cyp26b1	0.860797	1.83882	0.625599	0.552953
	Cyp27a1	1.42424	1.37754	0.158975	0.256218
	Cyp27b1	1.91642	1.05437	0.283763	0.261344
	Cyp2d22	7.36121	7.03468	1.47592	1.41704
	Cyp4b1	9.43483	6.85691	0.214323	0.0863553
	Cyyr1	1.76816	2.73931	0.635911	0.867224
	D430041D05Rik	1.05749	1.17909	0.514945	0.429829
	Dact2	7.40879	8.03147	1.52224	1.11522
	Ddhd2	10.5294	11.5031	4.84121	5.14213
	Ddr2	1.36893	1.52372	0.631004	0.435892
	Decr1	6.92067	6.45467	2.81575	2.95519
	Defb1	28.0993	21.5417	0.607048	1.17386
	Deptor	2.95612	3.17068	0.747215	1.0978
	Diap3	20.9614	17.765	7.01728	10.1661
	Dio2	19.4555	22.3087	0.453626	0.522262
	Dixdc1	22.5046	21.6122	5.53954	4.41124
	Dkk3	21.1004	23.2381	8.22635	11.4573
	Dlg2	1.89916	2.40698	0.285827	0.281367
	Dlk2	16.9682	16.0945	0.935692	2.47742
	Dll1	11.8548	12.6298	3.64522	3.79636
	Dll3	2.71471	3.0208	0.183053	0.29503
	Dnahc7b	1.9915	2.83811	0.241098	0.218597
	Dock5	1.44448	1.63242	0.441143	0.333762
	Dok5	4.89567	6.4734	3.12422	1.5619
	Dpt	3.05088	5.89803	2.04998	2.40282
	Dpysl2	2.86378	3.52172	1.90885	1.20994
	Dsc3	150.597	149.164	57.6602	64.1209
	Dsg3	34.9907	37.06	10.6992	11.8208
	Dusp5	4.01358	8.09804	2.58159	2.82309
	Ebf1	1.22247	1.36313	0.131886	0.14171
	Eci1	13.3249	13.4716	4.63179	5.08203
	Edn1	8.6362	6.96882	1.34297	1.35282
	Edn2	34.2534	34.3854	18.8699	13.9096
	Eea1	18.2732	18.8397	7.93646	8.6757
	Efnb2	62.0594	61.12	21.8985	25.3536
	Egfl6	5.35186	8.05088	2.74223	2.50068
	Egflam	9.80574	11.3434	1.24993	1.15123
	Egr1	678.952	744.876	262.397	290.336
	Egr2	98.4388	142.615	32.8346	39.3885
	Egr3	85.7099	119.691	33.5872	33.6546
	Ehd3	1.79731	1.62577	1.07402	0.379997
	Ehf	8.8235	8.91968	1.62571	1.15295
	Eif2c4	5.59618	6.20251	2.00193	1.90357
	Elmo1	24.8004	25.6135	3.31555	3.59908
	Elovl5	36.7914	34.3931	14.6858	13.2439
	Elovl6	22.5713	19.3834	8.19777	6.22408
	Endod1	4.04096	4.0228	1.70069	1.54191
	Enox1	18.3788	18.4049	7.1259	8.14319
	Enpp1	7.43122	11.674	1.91412	1.92821
	Epas1	1.30906	1.0249	0.494091	0.312866
	Epb4.1l1	6.826	7.22916	2.14137	2.78617
	Epb4.1l4b	45.6291	46.7696	21.9799	21.1611
	Epdr1	2.67054	2.84081	0.658511	0.928676
	Epha4	18.526	17.9995	8.64452	8.61867
	Ephb1	1.28183	1.4859	0.12539	0.101046
	Ephb6	101.014	106.08	18.3784	13.8674
	Ephx1	38.0504	32.4544	16.0835	14.9243
	Ephx2	4.82436	3.60083	2.1081	1.86665
	Epn3	6.02289	6.42889	1.8946	2.65713
	Eps8l1	1.76253	1.63046	0.892469	0.375243
	Eva1a	16.8025	20.8605	8.21033	9.55672
	Exph5	2.23169	1.86622	0.882971	0.954025
	Eya1	1.40491	1.30653	0.285643	0.327863
	Eya2	26.4901	23.6647	13.4741	11.5484
	Fabp4	5.65366	9.493	3.24795	2.77042
	Fah	13.654	10.9314	3.7321	3.62964
	Fam114a1	2.95488	4.47198	1.57722	1.90658
	Fam132a	142.782	132.541	25.5166	23.2984
	Fam13c	1.86381	2.09004	0.440952	0.662966
	Fam160a1	13.3225	13.2353	5.91619	6.49689
	Fam161a	1.62563	1.75381	0.619065	0.498872
	Fam163b	3.3545	3.52218	1.21708	0.477159
	Fam167a	3.91958	5.24516	1.28165	1.26845
	Fam189a2	2.09912	2.1503	0.307042	0.309296
	Fam212b	7.44628	7.35372	2.60283	1.91878
	Fam26e	3.03068	2.76192	0.338306	0.27262
	Fam63b	8.38742	8.88531	3.9669	4.34347
	Fam69c	1.57732	1.83996	0.459931	0.593023
	Fam81a	6.20901	5.72534	2.59149	3.14621
	Fam83c	8.82008	9.01275	3.74716	3.25721
	Far2	9.02877	6.06364	0.73603	1.27758
	Farp1	96.6252	102.249	45.4694	46.2493
	Fat2	25.1064	26.3874	8.55443	9.10958
	Fat4	1.94984	2.79693	0.947758	0.907338
	Fbln2	95.2713	94.8998	26.6673	26.6621
	Fbn2	10.9901	13.365	1.64213	1.75982
	Fbxl16	1.06867	1.09879	0.493986	0.5308
	Fbxo44	3.6385	2.23745	1.4432	1.36436
	Fcgrt	8.23793	9.75705	1.62683	1.03004
	Fgf1	2.1982	2.37336	0.268852	0.236364
	Fgf13	1.60167	2.2	0.706839	0.506329
	Fgf2	3.97098	4.09882	0.686854	0.553346
	Fgfbp1	111.818	96.2792	28.5449	36.4596
	Fgfrl1	3.64216	3.9124	2.09299	1.65712
	Fhdc1	4.43195	4.56365	1.88946	1.74027
	Fhod1	1.48028	1.5256	0.798247	0.701789
	Fhod3	9.71136	10.0328	3.45598	2.64454
	Fmn1	1.57422	1.8343	0.290744	0.519304
	Fmo1	2.94188	2.58209	0.719387	1.15946
	Fmo2	2.40755	2.51243	1.00985	0.511549
	Fos	807.098	726.509	239.546	204.728
	Fosb	125.207	81.3518	22.2236	22.3414
	Foxc1	11.3353	10.7298	2.99049	2.04371
	Foxo1	22.2007	21.0141	7.86701	6.65507
	Foxq1	2.66606	2.11491	1.00481	0.893527
	Frk	2.05586	2.21277	1.02098	1.08612
	Fst	133.394	138.603	10.652	18.6611
	Fxyd3	295.361	250.226	121.061	125.808
	Fzd1	26.527	27.5338	6.58189	5.74202
	Fzd5	5.78465	7.15848	1.97205	1.83637
	Fzd7	106.449	111.376	29.345	26.683
	Galnt18	17.5551	17.314	5.04746	5.68854
	Gas1	139.636	134.746	35.379	33.0106
	Gas6	46.0947	41.4953	22.7903	19.55
	Gclc	63.2451	63.5332	22.2427	23.2824
	Gclm	32.2164	32.8425	14.5268	12.5951
	Gcnt2	5.38364	5.62041	2.10506	1.97243
	Ggct	11.31	9.526	4.34912	3.19712
	Ggt6	12.5247	11.8565	4.6336	5.3342
	Ghr	14.3199	15.9452	6.06182	6.10675
	Gja4	1.67033	1.56139	0.360499	0.774671
	Gjb3	56.7656	42.6305	15.0957	12.8461
	Gjb4	25.9194	17.396	0.428195	0.460059
	Glrx	9.75622	9.49714	4.24396	5.31965
	Glt1d1	3.82615	2.55433	0.917613	1.47886
	Glt28d2	5.86845	5.97823	2.09825	2.12083
	Gm2a	6.42999	6.38288	2.5054	2.55994
	Gm3893	10.1881	8.24263	2.45688	3.04613
	Gm6537	148.077	178.856	2.98981	7.80863
	Gm7694	1.38784	1.49841	0.673569	0.603142
	Gm973	20.2567	19.8134	0.0533526	0.12899
	Gmds	23.1608	20.0212	7.53974	8.97664
	Gnai1	14.8743	14.9986	6.01257	8.81435
	Gng7	11.2767	11.8301	4.32138	5.12006
	Golim4	59.3307	60.4268	15.4856	16.035
	Gpc6	1.69347	2.05234	0.348496	0.449324
	Gpd1	1.90959	1.78167	0.174565	0.506441
	Gpr125	139.281	142.272	50.8552	48.6338
	Gpr135	1.88969	2.11277	0.982087	0.121749
	Grb14	35.8407	38.5661	5.94547	7.6167
	Grhl1	35.828	35.158	14.7369	15.0911
	Grm4	2.65595	2.83435	0.651102	0.262356
	Gsn	162.448	163.703	52.5704	51.1291
	Gucy1a2	1.09618	1.00143	0.499777	0.413672
	Gusb	8.43692	8.58606	3.7524	3.66734
	H2-T23	66.9011	39.662	13.0799	7.02649
	H2-T9	7.28174	5.88984	3.88122	2.18979
	Haao	3.35398	2.58208	1.12075	0.416807
	Has2	6.78173	7.07547	0.381402	0.289292
	Hdac4	19.8874	21.3753	8.71506	9.87186
	Hepacam2	2.49647	2.07562	0.0883057	0.213486
	Hid1	1.32534	1.81822	0.476506	0.480014
	Hist1h1c	30.5655	27.8614	7.39586	7.06731
	Hist1h2bc	19.8979	18.9867	5.4981	3.38727
	Hmgn3	84.942	77.4649	35.4491	29.3446
	Hoxa1	6.20503	4.75498	1.10904	1.40445
	Hoxa2	18.043	12.2309	2.59208	2.23451
	Hoxa3	11.5872	10.0814	2.38457	3.59536
	Hoxa4	7.39095	6.63073	3.08342	3.02482
	Hoxa5	22.515	18.9509	4.21806	5.85162
	Hoxb9	4.65126	4.58683	1.55214	1.80352
	Hpn	7.96596	7.03817	4.16427	2.5117
	Hsd11b2	5.2316	4.39558	0.162838	0.174962
	Hspa4l	15.4767	15.6561	3.5866	2.56443
	Id4	87.3431	88.8289	11.9195	10.8365
	Idh1	181.756	174.34	76.001	75.0248
	Iffo2	31.3317	32.2012	8.62411	7.92043
	Ifi27l1	8.66963	8.74811	2.57247	2.64933
	Igf1	1.28078	1.81348	0.0795406	0.363333
	Igfbp2	19.1484	17.8954	3.77241	6.58623
	Igfbp3	4.84004	6.87076	2.49018	2.84831
	Igfbp5	46.8955	51.7562	21.3353	21.6551
	Igsf8	28.7033	28.6723	14.2447	12.7626
	Il13ra1	23.1138	21.91	9.77408	10.9355
	Il17rb	13.5421	14.0327	4.58098	4.50764
	Il17rc	15.5385	15.1624	7.59316	5.82063
	Il1f5	7.88743	7.88653	3.85657	3.47747
	Il20rb	16.8603	16.1391	4.82389	4.84335
	Il22ra1	2.21956	2.20264	1.01886	1.09481
	Il34	4.05404	3.81854	1.0579	0.947203
	Il6ra	3.33647	3.22729	1.20915	0.974445
	Ildr1	3.46969	3.94762	0.910376	0.652137
	Inhbb	35.7471	36.5145	6.17554	5.58998
	Insm1	5.10592	5.5116	0.0960605	0.516091
	Irak3	2.78261	2.12214	0.587244	0.525834
	Irx1	105.109	110.66	57.0152	43.8875
	Isoc1	101.331	106.845	50.9938	52.8666
	Isoc2b	3.66167	2.023	1.41939	0.653532
	Itfg3	34.4449	31.883	12.3165	13.9829
	Itga1	7.90918	8.99855	0.613707	1.11601
	Itga4	3.55745	3.44407	0.539858	0.656446
	Itga6	89.2856	93.4344	24.5319	32.0926
	Itga8	3.36991	3.72088	0.635546	0.630394
	Itgb6	3.57971	3.78618	1.02946	1.18065
	Itih5	3.18262	4.64235	1.29725	1.53971
	Itpka	2.88711	2.44704	0.111262	0.806934
	Jak3	2.50265	2.82425	0.963483	0.881364
	Jdp2	1.54689	2.09504	0.58977	0.527979
	Junb	259.593	287.95	124.911	139.929
	Kank1	41.1683	46.1178	21.0635	20.5335
	Kank4	3.88089	4.32907	0.829158	0.731865
	Kcnab3	2.28755	2.04451	0.886833	1.11862
	Kcnh1	2.51057	3.02529	0.570747	0.449261
	Kcnip3	5.73507	5.67647	2.46239	2.12675
	Kcnk7	11.631	11.7671	1.05454	0.617969
	Kcnv1	1.21482	1.37521	0.359228	0.374651
	Kctd14	10.4237	9.90009	1.05695	1.09878
	Kctd7	1.30356	1.51922	0.736401	0.611451
	Kirrel2	1.80705	2.35321	0.123754	0.24933
	Kirrel3	1.12907	1.43645	0.284625	0.394017
	Klf15	13.9745	11.8149	5.75555	5.88428
	Klf2	3.28361	1.77108	1.21796	0.267677
	Klf3	18.223	19.1967	8.08503	8.71011
	Klhl3	1.37174	1.98893	0.64748	0.745395
	Klk10	11.1011	11.2008	5.22324	5.4468
	Klk7	1.55454	1.79247	0.694132	0.466131
	Klrg2	16.1355	14.2148	2.93726	4.66444
	Krt15	1844.37	1748.95	836.683	785.715
	Krt28	4.53915	2.75756	0.690002	0.77842
	Krt35	1.52304	1.34945	0.234788	0.1892
	Krt71	1.64524	0.910401	0.318592	0.220063
	Krt73	12.2714	8.13776	0.82746	0.814997
	Krt79	482.491	413.593	192.088	181.3
	Krt80	24.8468	26.3479	13.4625	10.6198
	L3hypdh	12.0434	10.6769	5.40026	5.35595
	Lap3	118.35	103.866	17.8796	17.6688
	Ldlrad4	6.55508	7.74259	1.96428	2.15282
	Leprel1	8.66708	8.65001	3.20462	2.47635
	Lgals9	32.6097	33.2065	6.74171	6.763
	Lgi3	14.9053	12.4472	0.15167	0.244458
	Lgr4	159.843	163.546	55.9632	63.9223
	Lgr5	42.3953	45.4163	3.34198	3.82906
	Lhx3	3.9411	3.98411	0.0895139	0.288543
	Lifr	48.4027	50.5962	2.2164	3.07388
	Lmcd1	48.2798	52.1936	1.87111	0.942378
	Lmna	299.346	297.118	100.413	92.0001
	Loxl1	1.17628	2.10681	0.519024	0.511227
	Lpar3	19.1836	17.875	4.24103	3.73418
	Lpar5	2.96312	2.22887	0.669403	0.839073
	Lpcat2	10.3948	10.2472	3.3673	3.52493
	Lpcat3	25.2489	22.3947	11.4664	12.0473
	Lphn2	48.6072	48.0712	21.3489	23.0074
	Lpl	21.7149	18.9643	0.801069	1.06331
	Lrig1	246.284	231.055	52.1015	57.3989
	Lrig3	59.8426	62.8914	29.0902	28.4742
	Lrrc17	2.09472	2.9384	1.12997	1.09271
	Lrrn3	5.15216	5.03904	0.275096	0.487735
	Lrrtm1	2.84283	2.17486	1.12576	1.12621
	Ltbp2	2.61084	3.60295	0.199066	0.0916748
	Ltbr	17.1508	16.465	3.27381	4.05291
	Ly6d	102.903	81.2146	46.886	27.04
	Lynx1	1.47872	1.23371	0.604095	0.350524
	Maf	8.90586	8.53497	4.05267	3.85985
	Magee1	5.94919	5.79413	2.51202	2.15645
	Mal2	14.1655	10.9062	3.5397	3.27622
	Mall	14.6228	13.8486	4.05852	4.66055
	Mamld1	8.38072	8.07221	1.49636	1.85432
	Man2a2	40.8845	40.711	14.414	14.434
	Manba	2.68369	3.23674	0.234687	0.714503
	Mansc1	1.5336	1.03438	0.579059	0.533308
	Mcc	14.767	15.1026	6.88244	6.03054
	Mctp2	1.69041	1.80923	0.73241	0.944415
	Mdga1	3.00552	2.14343	0.680334	0.857335
	Medag	1.31382	1.75579	0.26994	0.978927
	Megf6	105.35	111.593	45.2604	39.4884
	Mfap3l	9.79911	10.6371	0.904726	0.65488
	Mfsd4	9.77776	10.2096	3.41141	4.88822
	Mfsd9	7.49647	7.90849	2.08272	2.02399
	Mgll	5.82813	5.21759	2.08725	1.34418
	Mgst1	65.438	49.7827	11.8387	9.44427
	Mgst2	14.8575	15.9557	6.00044	3.79785
	Miat	18.6477	23.8929	0.438958	1.62219
	Mir22hg	2.01035	2.0544	0.342523	0.368024
	Mitf	9.6162	12.1705	0.849745	1.26935
	Mmp2	48.9236	66.4993	20.5167	20.3536
	Moxd1	160.212	144.863	57.5928	53.7151
	Mrc2	11.0396	12.2636	4.53128	3.48167
	Mreg	11.2165	9.98283	4.71428	3.35587
	Msn	103.89	104.066	30.5517	31.3037
	Msrb3	8.33311	9.53968	2.58263	2.66411
	Mst1	1.83831	1.76812	0.517364	0.486412
	Mst1r	2.05575	2.15929	0.584482	1.07202
	Myo1d	12.0574	12.3847	5.18696	5.0049
	Myrip	1.1446	1.61472	0.199092	0.12836
	Naprt1	4.91116	3.39086	1.11282	0.683249
	Nav1	6.30758	5.78712	1.62031	1.76847
	Nbl1	45.664	51.5452	5.95191	5.25745
	Ncald	21.8393	23.0988	0.927596	1.39129
	Neat1	53.7301	46.8149	13.3343	13.2672
	Nedd4l	6.97086	6.96348	3.7317	3.16143
	Neurl1b	28.0186	26.1496	2.40131	2.57218
	Nexn	2.15583	3.08958	0.609994	0.798814
	Nfatc1	110.89	114.645	24.9725	19.8674
	Nfic	35.4821	34.7313	13.7821	11.4187
	Nfil3	10.5276	13.0594	4.45344	3.79042
	Nfkbib	22.3712	26.7543	11.1445	10.2638
	Niacr1	8.98599	10.5154	3.07799	2.23235
	Nkain2	0.781242	1.23492	0.270853	0.291036
	Nlgn1	3.27887	3.62954	0.061865	0.166192
	Npr2	2.74611	3.56824	0.943583	0.802675
	Nr4a1	160.715	289.487	61.4983	101.543
	Nr4a2	0.592878	1.59997	0.41568	0.566898
	Nrbp2	103.11	91.0648	39.5491	43.6335
	Nrcam	1.82445	2.36524	0.152642	0.307543
	Nrep	306.611	291.765	116.251	127.02
	Nrip3	1.0187	1.66203	0.43947	0.59028
	Nrsn1	1.07438	2.50403	0.231828	0.523097
	Nrtn	28.947	31.1812	13.5037	11.823
	Ntf3	7.40381	6.50407	1.7056	2.98253
	Ntn4	8.98303	8.39092	2.72809	3.08444
	Nuak1	41.1501	43.0009	14.5408	15.3512
	Nudt6	5.77643	4.41653	1.8109	2.91829
	Olfml2b	1.50526	2.59357	0.124893	1.05682
	Olfml3	10.7822	9.36235	1.45438	1.12511
	Oplah	18.7311	17.696	6.20479	6.27962
	Osbpl5	41.0535	41.4464	20.0458	19.7922
	Osmr	7.61446	7.63364	2.195	1.9585
	P2rx4	3.93989	3.75067	1.30029	1.69267
	P2ry1	9.62232	9.45353	0.934496	0.753109
	Pak3	3.80281	4.19838	1.96507	1.45885
	Palld	14.4676	15.8886	0.968528	1.12743
	Palm2	1.33225	1.46178	0.433245	0.532932
	Palmd	28.9797	29.2221	9.10819	10.6463
	Paqr7	9.04424	8.46047	3.36483	2.86651
	Parvg	2.99661	2.16843	0.69793	0.710425
	Pcdh20	9.42122	9.66782	0.270689	0.319955
	Pcdh9	1.79099	2.12221	0.674829	1.01432
	Pcolce	3.14228	6.31216	2.9258	1.71467
	Pcsk2	1.57571	1.62142	0.379844	0.515569
	Pde1b	2.03734	1.67399	0.524799	0.475792
	Pdgfb	19.8811	20.4712	5.04005	5.09702
	Pfkp	8.72685	7.60024	2.73018	2.50906
	Phactr1	1.75444	1.44764	0.0747997	0.200844
	Phyh	14.5489	16.7339	4.88522	5.62368
	Phyhip	61.1109	57.4848	11.3294	10.9562
	Piezo2	1.98641	1.78949	0.476924	0.628963
	Pitpnm3	5.62841	6.04106	0.595792	1.2086
	Pkp1	236.396	228.516	106.005	114.669
	Pla2g2f	34.6263	31.3688	5.67561	3.82772
	Pla2g7	37.7129	34.4185	1.61932	1.68377
	Plat	5.98166	5.0254	2.39564	2.24196
	Plbd1	26.7909	25.8724	11.2694	10.8326
	Plcd1	5.62994	6.88661	2.83414	2.31363
	Plcl1	7.32006	8.65171	0.658985	0.62345
	Plek2	28.7695	30.4327	10.1519	12.749
	Plekhf1	2.30783	2.35784	0.917613	0.105633
	Plekhg6	12.5405	12.5103	4.71191	4.44304
	Plin2	41.3254	36.9395	17.73	16.9398
	Plxdc1	1.1852	1.24564	0.134528	0.054133
	Plxna2	10.7183	11.9911	3.34406	3.36715
	Pm20d2	5.10094	5.64418	2.16646	2.64624
	Pnp	21.9045	22.0614	9.09512	8.71054
	Pon3	4.91784	4.28907	1.12908	1.18281
	Pou2f3	57.9117	52.8734	22.6221	24.2657
	Pou3f1	36.4584	41.1891	8.81049	6.73745
	Pou4f3	10.7719	12.4434	0.279128	0.74971
	Ppap2c	24.5287	21.3369	11.9702	9.64596
	Ppara	1.35025	1.22521	0.116996	0.125717
	Ppargc1b	3.71819	3.90932	1.31053	1.22514
	Ppp1r14a	20.6173	22.3661	2.97539	2.79606
	Ppp1r14c	87.1175	88.397	42.9573	38.6798
	Ppp2r3a	19.8417	22.3951	5.85682	6.52559
	Ppp3ca	31.537	35.9232	13.4745	14.3813
	Prdm1	34.5085	38.4798	7.52007	5.95677
	Prelp	3.15945	5.08984	0.532441	0.643637
	Prickle2	1.92637	1.98495	0.35257	0.195952
	Prkcdbp	33.4582	34.5614	8.79463	6.1471
	Prkd1	2.51331	2.2824	0.405335	0.653316
	Prlr	3.68637	3.24008	0.592002	1.28645
	Prrt2	3.75579	4.05336	2.00615	1.8386
	Prss12	2.11795	2.32335	0.0749085	0.664035
	Psapl1	16.1949	11.4859	3.37888	2.78483
	Ptger4	1.85462	3.17692	0.517394	0.500347
	Ptgfr	1.2582	1.38014	0.452309	0.138864
	Ptgs1	1.50817	1.05136	0.372815	0.218505
	Pthlh	133.481	132.826	40.6272	42.8492
	Ptpla	19.195	15.9484	9.55188	7.94601
	Ptprv	28.5442	23.3873	4.96764	4.36519
	Ptrf	48.7311	52.7859	24.8425	24.488
	Pxdc1	9.87597	11.832	2.46327	3.6248
	Rab38	32.4389	33.3025	11.5831	13.5577
	Rab3b	4.35553	3.86028	0.376987	0.42066
	Rai14	29.9564	30.6131	13.7413	13.0733
	Ramp1	15.2358	17.0033	0.959104	0.995138
	Rapgefl1	70.0174	64.7149	17.4419	18.4468
	Rasa4	1.01953	0.967096	0.333256	0.338778
	Rasd2	4.64878	4.4987	0.484167	0.78036
	Rassf5	7.98543	8.36643	1.8073	1.54752
	Rbm24	1.69143	2.12527	0.299081	0.0964103
	Rell1	40.3835	37.1927	16.4532	18.1268
	Rem2	1.67269	2.17604	0.583921	0.513328
	Rerg	27.428	24.8689	4.20283	4.47784
	Ret	1.06584	1.08612	0.153092	0.150522
	Retsat	9.65813	6.65417	4.1271	3.32582
	Rgag4	1.25424	1.14394	0.373533	0.49655
	Rgma	88.2825	86.2351	24.045	20.3046
	Rhbdf2	16.8748	24.4581	6.36483	5.93482
	Rin3	1.22989	2.14385	0.420443	0.410923
	Rnase4	27.885	25.3563	10.9152	11.7186
	Rnf150	2.73825	2.20623	1.08677	0.806094
	Rnf217	17.8102	16.8467	7.7389	7.38548
	Rnf39	9.24974	10.3298	2.56717	3.44776
	Rorc	8.37645	7.55304	1.7603	1.51315
	Rsph3b	2.80488	1.32347	1.07205	0.508168
	Rtn4r	13.5822	13.5294	5.08124	4.99983
	Rtn4rl1	2.05113	2.41822	0.669521	0.422264
	Rundc3a	2.52197	2.47885	1.00445	1.43125
	S100a1	7.84459	8.02604	2.22213	4.2311
	S100a14	409.939	350.636	91.4421	109.431
	S100a6	63.9995	68.1728	27.7701	30.9775
	S1pr5	1.89207	1.7671	0.78504	0.442848
	Sbspon	3.7753	4.4292	0.424948	0.513685
	Scd1	46.8298	41.5061	9.14846	7.07285
	Scel	34.683	34.9346	3.99129	4.49291
	Scnn1b	4.25667	3.55253	0.469911	0.641214
	Scnn1g	5.48229	5.6889	1.20884	1.8957
	Scube2	2.69713	2.21084	0.404028	0.607794
	Sdc3	13.1357	14.7375	4.49346	4.32717
	Sdpr	5.66401	5.82898	1.10792	2.14286
	Sdr16c5	49.9062	42.0074	2.63322	3.15248
	Sdr16c6	38.7354	32.7672	7.37478	6.52217
	Sdr42e1	10.6717	8.63913	4.21397	3.03704
	Sec14l2	3.48025	4.76283	1.58689	1.43478
	Sema3a	10.9179	10.7169	4.01104	5.8029
	Sema3b	12.4787	11.0176	4.34166	5.44749
	Sema3e	32.8243	36.7926	5.50958	6.39047
	Sema4b	28.0729	25.1251	10.3343	10.2593
	Serpina3g	3.92837	2.66133	0.689986	0.714891
	Serpina9	21.9887	17.6833	0.179309	0.674299
	Serpinb8	13.4002	12.5089	5.58194	7.14232
	Serpini1	6.97284	6.97183	2.3118	2.98088
	Sertad1	31.1604	35.007	8.20965	13.9493
	Sesn3	28.7884	31.9812	10.7813	13.4575
	Sfrp1	37.1544	35.9146	3.58931	3.26079
	Sfxn3	32.1184	28.8453	9.82154	12.3618
	Sgk1	85.3938	106.453	12.3756	13.2844
	Sgpp1	26.852	23.8571	11.9325	13.024
	Sh2d4a	15.7733	11.5024	4.92158	5.89263
	Sh3d21	10.5477	10.5823	2.85476	3.35343
	Sh3kbp1	4.47617	4.51507	1.14278	1.2279
	Sh3rf1	27.1068	28.7603	12.4811	12.1175
	Sh3tc2	2.26944	3.39304	1.2342	1.24753
	Shisa2	14.5394	14.313	1.90276	2.02806
	Sirpa	21.2085	21.7574	7.99276	6.32163
	Skap2	68.5918	62.8262	17.9164	24.8786
	Slc12a2	33.716	53.0614	6.89981	6.80283
	Slc16a2	1.72171	1.23932	0.733567	0.66508
	Slc16a7	18.3914	14.4495	2.92129	2.61575
	Slc25a45	2.64082	2.1366	0.219195	0.618229
	Slc27a1	91.6994	81.2631	39.1627	36.998
	Slc27a6	0.906064	1.50446	0.451111	0.302949
	Slc29a1	20.2201	19.6082	7.01067	5.27893
	Slc2a9	3.66337	4.12263	1.01157	1.00147
	Slc39a14	12.03	13.1168	6.53477	5.17348
	Slc41a3	1.05341	1.13673	0.349683	0.281796
	Slc47a1	1.61405	0.815424	0.296362	0.597076
	Slc50a1	14.2931	14.0159	2.6613	2.2301
	Slc6a17	2.44592	3.14896	1.07291	1.32103
	Slc7a8	3.11414	3.1019	0.756867	0.914939
	Slco2a1	7.74349	6.89226	0.189266	0.114397
	Slco4a1	11.4035	9.58469	3.1924	2.6736
	Slitrk6	3.57985	3.25856	1.43657	1.41099
	Smad9	0.880904	1.32123	0.158327	0.11342
	Smoc1	2.24187	2.33259	0.471601	0.626018
	Smtn	19.946	21.0574	10.7333	8.13828
	Snta1	4.73702	3.93894	2.15684	2.04038
	Sntb1	22.3382	21.7576	7.08294	7.85755
	Snx33	8.71965	8.91551	4.57702	3.72218
	Snx7	10.5842	9.68502	2.25897	3.08549
	Soat1	12.2157	8.45005	4.73463	4.18287
	Socs3	29.6899	27.2171	9.0075	9.85142
	Sorcs2	14.7122	14.8157	2.33943	1.67294
	Sord	11.7789	11.5749	5.54592	5.70093
	Sostdc1	236.2	229.09	47.3686	45.3227
	Sox11	4.92878	5.81053	2.04408	2.19056
	Sox2	5.14356	6.30976	0.678626	1.22245
	Sox5	1.1709	1.32686	0.457486	0.589365
	Sox7	8.12398	7.08693	2.36028	2.04478
	Sox9	90.8204	95.622	37.2853	31.271
	Sparcl1	2.27058	4.25057	1.05405	1.64892
	Spock1	2.59476	2.83141	0.772516	0.556987
	Spon2	1.3499	2.38361	0.706105	0.355639
	Spsb1	4.8146	4.56339	2.12162	1.93945
	Sqrdl	1.63906	1.40149	0.548669	0.607676
	Srcin1	19.2637	17.4209	8.83136	8.96179
	Ssfa2	170.675	174.616	39.6717	36.5221
	Stard5	37.8481	31.6158	13.5156	16.6312
	Stbd1	4.00372	5.12324	2.46131	1.45722
	Steap3	1.08042	2.01427	0.52975	0.512295
	Steap4	21.8102	19.543	4.18221	4.46081
	Stfa1	70.4862	65.534	3.21405	2.30062
	Stfa3	386.434	419.047	106.039	116.601
	Stim1	30.9841	30.4681	14.5538	13.2083
	Stom	36.0506	37.9455	6.31445	4.83842
	Sv2a	2.10306	2.12415	0.926782	1.02206
	Svil	50.7476	53.5214	24.58	23.1331
	Syde1	2.71611	3.07874	1.23042	0.991586
	Syn2	2.49953	2.86835	0.0744154	0.0799616
	Sytl2	1.23998	1.98472	0.384775	0.553729
	Tanc2	15.3008	15.414	5.80984	6.38613
	Tbc1d4	16.9103	20.7407	3.5339	2.71133
	Tbc1d8b	6.25322	7.13629	3.33178	3.16048
	Tbx1	145.179	151.9	25.0607	19.0983
	Tchh	2.6254	1.79837	0.938326	1.14735
	Tcp11l2	7.96513	7.32691	3.06884	3.16554
	Tenc1	20.0672	23.0812	9.97431	7.63239
	Tex40	10.3996	12.0725	5.02764	5.71851
	Tfap2e	10.897	11.8984	1.87359	1.58534
	Tgfa	6.91113	5.92922	1.91404	2.64953
	Tgfb2	151.027	164.308	75.9072	79.1931
	Tgfb3	166.784	166.517	62.1988	51.0185
	Tgfbi	37.7903	43.8469	4.2585	3.81314
	Tgfbr2	8.05848	7.68899	2.76082	3.37686
	Tgm5	15.9817	16.7842	3.74959	4.36121
	Thbs1	43.8343	60.3802	15.6537	15.0235
	Thsd1	1.8106	2.63165	0.708109	0.484209
	Thy1	13.3245	15.0707	5.70478	5.25384
	Timp2	24.8841	29.6474	11.249	11.0919
	Timp3	99.8231	97.6646	11.9164	13.2294
	Tinagl1	2.17853	3.37224	0.204392	0.329418
	Tlcd2	13.5256	10.464	4.58705	6.93962
	Tle2	5.63723	5.37439	1.36985	0.904756
	Tlr3	1.08059	1.03469	0.439768	0.531615
	Tlx3	2.78675	2.93842	0.668351	0.861713
	Tmbim1	32.1818	32.5098	16.421	15.4672
	Tmco4	5.74997	5.9463	2.23151	2.05526
	Tmem106c	17.0731	13.8806	7.10291	6.85535
	Tmem108	4.57029	4.15517	0.518867	0.79449
	Tmem180	2.96564	2.6813	0.30265	0.209053
	Tmem246	6.80164	6.52979	2.49963	2.30219
	Tmem26	1.96245	2.0254	0.655501	0.694303
	Tmem30b	10.4771	9.69463	4.57894	4.16321
	Tmem40	14.7791	17.0701	4.59371	5.62418
	Tmem51	9.91401	11.0695	4.81381	4.48261
	Tmem53	6.85772	8.07743	3.58773	2.79749
	Tmem63a	14.8452	15.4002	5.62507	4.55717
	Tmem65	45.089	47.4156	17.9636	19.0762
	Tmprss4	7.94374	10.3126	1.6096	2.10343
	Tnc	26.4299	27.5006	9.54396	10.6811
	Tnfrsf11b	11.539	9.79837	1.93083	1.0003
	Tnfrsf18	20.8915	19.5817	8.92368	10.022
	Tns1	11.6701	11.6041	1.88703	1.73162
	Tns4	28.1408	24.6371	4.64592	4.78869
	Tox	8.74222	10.5945	1.22556	1.15227
	Tox3	19.0761	16.7222	4.74359	4.77241
	Tpm2	9.29412	10.2647	2.74337	3.20179
	Trabd2b	2.88149	3.23989	0.822914	0.708939
	Trf	16.1552	14.7744	0.295399	0.408089
	Tril	5.68786	7.04244	2.53811	2.13072
	Trnp1	2.61603	2.14682	0.981944	0.69237
	Trpc4	1.54265	0.899363	0.239496	0.19301
	Trpv4	17.8455	18.0081	5.14083	3.70937
	Trpv6	14.1805	16.5657	3.37704	3.62866
	Tsc22d3	7.10256	5.95818	3.76055	2.44749
	Tshz2	8.33632	7.6129	0.887898	0.834826
	Tst	22.604	21.2245	8.52786	9.1619
	Ttc39b	1.55024	1.51445	0.660118	0.600651
	Ttpa	1.82078	1.71186	0.570184	0.357391
	Txndc16	14.6284	14.3241	5.51949	6.10906
	Uap1l1	2.61	3.11463	0.838963	1.15897
	Ube2ql1	2.4929	2.14524	0.763133	0.527135
	Ucp2	233.6	211.31	57.3103	48.4354
	Ugp2	37.5953	34.243	16.622	16.6306
	Ugt1a1	6.97397	5.07936	0.674407	0.638388
	Unc79	1.76547	2.21244	0.294489	0.372956
	Upk3bl	7.69829	4.97583	1.14307	1.84206
	Vangl1	40.3746	37.1634	15.3682	17.0001
	Vat1	29.9609	30.3771	14.7163	13.6687
	Vcan	56.2908	55.3903	21.0819	25.6151
	Vdr	53.8842	46.2396	8.49839	7.7116
	Vsnl1	13.6342	14.3481	0.929121	1.33108
	Vwa5b2	1.92602	2.35279	0.314715	0.507265
	Wipi1	32.0984	30.5327	13.9428	14.6242
	Wnt5a	25.6319	24.8532	2.87407	2.64621
	Wnt7b	33.9626	32.8132	12.8057	14.8824
	Wwc2	12.3138	12.8075	6.86542	5.63902
	Wwp1	21.7946	26.2818	9.73183	11.513
	Xdh	1.89991	1.40913	0.393234	0.333589
	Ypel2	11.5201	11.7047	5.23605	5.51218
	Zc3hav1	8.8993	8.25014	3.03188	2.67381
	Zfp185	12.4326	13.5586	6.79922	5.56515
	Zfp36	149.811	187.466	66.5481	78.346
	Zfp365	7.67264	7.32172	3.82428	3.20816
	Zfp608	7.07983	5.82695	3.03228	2.82831
	Zfpm2	3.56494	4.28792	0.247418	0.214735
	1300002E11Rik	7.66204	9.01113	15.4221	18.333
	1700019G17Rik	1.02046	0.723885	2.0756	2.17957
	1700058G18Rik	5.44539	4.16203	20.753	15.9711
	1810058I24Rik	49.0467	45.8675	97.9657	99.533
	2010107G23Rik	3.46129	2.97514	7.11997	7.52462
	2010300C02Rik	7.36134	8.6473	58.9752	59.7971
	2310003H01Rik	16.0903	18.0083	36.9292	34.9781
	2610019F03Rik	2.87754	3.38418	9.39227	12.5722
	2610307P16Rik	3.43128	4.04584	7.0552	8.62276
	2610318N02Rik	2.15106	3.14671	7.62982	6.54899
	4930452B06Rik	0.852558	0.849423	2.08691	2.39442
	4930550C14Rik	0.552248	0.680262	2.38474	3.29415
	5830473C10Rik	0.0408274	0.308394	0.969027	1.34883
	5930412G12Rik	2.30853	2.32796	7.59376	7.63301
	6030419C18Rik	1.11623	1.85296	4.07605	2.46354
	6530402F18Rik	0.246734	0.244211	2.6354	2.1915
	8430408G22Rik	2.93969	5.30879	14.9876	12.3961
	9230110C19Rik	8.18792	6.84681	16.6482	18.4722
	9930013L23Rik	0.427598	0.580573	1.92339	2.20836
	A330021E22Rik	0.523254	0.594595	1.51492	1.38843
	A730017C20Rik	14.7625	14.4351	29.698	35.6269
	Abcc4	3.13186	3.02217	13.4581	12.4351
	Abcc8	0.336855	0.478622	2.25611	1.47923
	Abhd2	9.44693	9.56188	22.7523	22.1859
	Abi3bp	3.48467	3.8608	21.2977	20.0265
	Acaa1b	1.1824	0.789477	4.55706	3.62326
	Ace2	0.573694	0.704714	2.33531	1.69143
	Actn3	0.311553	0.134517	1.37786	0.649984
	Adamts15	1.14888	0.986219	2.65254	2.76495
	Adamts20	0.319993	0.476932	1.83388	1.92385
	Adamtsl2	0.165399	0.416621	1.48667	1.67732
	Adora2b	2.52266	2.55808	8.81937	6.8438
	Aen	9.8638	9.93995	23.025	21.7651
	Afap1l1	5.05619	5.54335	11.7264	11.2492
	AI414108	0.813606	0.956655	2.35927	2.38848
	Aif1	0.950749	0.639684	2.69613	4.13769
	Aif1l	1.52095	1.8716	8.00605	7.35098
	Ajap1	0.116904	0.0946458	14.1544	10.0095
	Akna	1.039	0.932141	3.56819	2.80618
	Alcam	85.401	86.7528	184.865	198.943
	Aldh3b2	8.53442	6.32253	15.2544	14.6924
	Alox12	0.240085	0.388738	2.71916	2.60873
	Alox12e	12.9281	12.7138	45.083	33.203
	Alpl	0.108185	0.194596	1.90619	1.1913
	Ankrd35	0.436359	0.848056	1.62361	1.44121
	Ankrd45	0.119224	0.12872	1.38875	1.20209
	Ankrd6	2.79624	2.41975	5.518	5.44669
	Anks6	0.400752	0.432655	2.32326	1.74167
	Aph1c	0.371957	0.419925	1.38569	1.2049
	Arg1	0.258057	0.278264	1.74074	2.01991
	Arhgap22	1.3591	1.24118	3.45852	3.45362
	Arhgef16	4.71819	4.26767	15.2687	12.9401
	Arl4c	51.9889	49.7213	118.545	106.4
	Ascl4	1.19314	1.10207	44.1669	52.7896
	Aspg	0.594593	0.677423	2.63683	3.10129
	Asprv1	38.2993	36.8238	86.2803	88.8212
	Atp10b	0.352469	0.584605	1.56103	1.53155
	Atp6v0a4	1.64657	1.75897	4.15757	4.37409
	Atp8a1	1.59779	1.4958	4.61795	4.68026
	Axin2	22.1208	22.1837	37.6074	40.2544
	B3gnt5	0.0774395	0.104525	1.04891	1.09872
	B4galnt4	6.63525	7.62975	18.7637	17.2529
	B4galt5	0.504207	0.748567	1.3821	1.53381
	B4galt6	0.661855	0.909696	2.70891	2.32695
	Bach2	10.4808	11.9259	25.2298	24.0633
	Baiap2l2	0.266618	0.527398	1.19858	1.15906
	Basp1	42.0054	39.2581	93.354	94.0576
	Bbc3	2.2925	2.5743	9.23782	9.92573
	Bcl3	0.101449	0.328316	2.2988	2.46996
	Bcl6	15.8501	14.1758	53.8388	47.5473
	Bdkrb2	0.335384	0.241161	2.59379	2.04155
	Bex2	7.44369	9.37056	22.5144	22.725
	Bex4	5.32806	4.40971	24.8024	21.6477
	Bik	1.51929	1.05175	4.33694	3.02217
	Birc3	4.45474	4.84293	10.06	12.9825
	Bmp2	5.23115	5.56781	61.4132	81.0426
	Bmp4	7.87549	6.49762	34.8389	28.3569
	Bmpr1b	1.83836	2.74741	5.08009	6.47639
	Bspry	2.36159	1.27368	6.13926	5.69399
	C130021I20Rik	4.1608	4.2413	19.8052	17.0924
	C1s	0.741449	0.900374	7.83706	9.22044
	C430049B03Rik	0.269907	0.258976	0.902979	1.09124
	C530008M17Rik	0.445471	0.563592	1.15287	1.12822
	Cabp1	1.24831	1.70402	16.1727	16.941
	Cacna1b	0.284633	0.238002	1.30754	1.34315
	Cacna2d1	0.387176	0.493731	2.4523	2.40507
	Cadm3	0.807312	1.10107	6.46132	6.3151
	Cadm4	3.70511	3.53839	9.28128	7.10913
	Calhm2	4.45277	4.27049	9.80254	8.4469
	Calm4	60.0996	55.2584	137.74	145.752
	Calml3	23.6911	22.7943	59.9064	54.8691
	Card10	6.8443	7.71194	35.6421	32.2642
	Cbx2	22.9485	23.9565	50.0901	47.03
	Ccdc109b	1.3941	0.870072	7.36593	5.61633
	Ccdc114	1.03747	0.719772	1.43897	2.51252
	Ccdc116	0.48045	0.592845	1.13513	1.42656
	Ccdc149	0.914993	0.639149	2.17699	1.45032
	Ccdc8	14.3693	15.8902	49.6977	43.5909
	Ccdc85a	0.0566251	0.0609416	1.15605	0.884919
	Ccdc88c	3.33902	2.96265	6.93232	6.0685
	Ccdc92	5.59386	5.2927	15.9182	15.2243
	Ccnjl	1.29991	1.54693	3.88309	3.59289
	Ccr10	1.14009	0.761271	3.98374	3.77675
	Cd274	0.0977107	0.158237	2.29213	2.12324
	Cd74	1.06751	2.11534	87.1206	75.5734
	Cdc14b	2.54747	2.62999	6.59445	6.54011
	Cdkn1c	8.91526	14.3068	38.2785	35.602
	Cgnl1	23.565	24.0589	53.3365	50.5875
	Chn1	0.792135	0.896091	2.1906	2.29324
	Chn2	0.596773	0.490873	1.40984	1.5413
	Chrd	0.49094	0.559429	1.32382	1.28022
	Chst15	9.70663	10.1008	19.0841	20.5785
	Cited4	0.928603	1.16774	3.09091	2.69256
	Ckb	15.5361	15.1539	80.5004	58.9814
	Cldn4	1.33801	1.38784	25.7103	30.2497
	Cldn6	1.64123	1.76982	20.2339	19.1047
	Cldn7	0.723868	1.03451	4.63836	5.26622
	Cnn3	21.9437	20.492	67.2481	67.9804
	Cntn2	0.335298	0.332802	1.30935	0.881993
	Cntnap1	7.45019	7.51611	25.6003	23.6277
	Cntnap4	0.217378	0.410782	4.37596	3.24323
	Coch	0.32902	0.197268	2.14793	1.65265
	Col11a1	0.465685	0.619025	2.66528	2.0131
	Col26a1	0.934735	1.72952	5.8698	4.46916
	Coro2b	0.443267	0.957119	1.59362	1.54114
	Crabp1	3.51024	5.82082	15.1757	11.4622
	Crmp1	0.665643	0.457238	1.795	1.26245
	Csf1	1.11224	1.52559	7.13594	7.05656
	Ctnnb1	553.642	563.991	1382.63	1458.97
	Cux2	0.394517	0.426026	2.07176	1.99762
	Cxcl1	0.969257	3.13132	6.16503	9.55977
	Cxcl14	437.609	474.6	1425.89	1206.52
	Cyb5rl	2.70475	4.62923	9.83551	11.7607
	Cyba	18.0167	19.6869	43.6954	48.1733
	Cybrd1	0.488073	0.508885	0.925632	1.17016
	Cyfip2	6.13098	6.8615	59.6412	60.793
	Cygb	6.73118	8.19299	22.1651	24.973
	Cyp4f39	0.483911	0.895339	3.35579	3.4255
	D130040H23Rik	0.415127	0.547414	1.0451	2.40628
	Daam2	0.866182	1.69938	7.93947	5.77123
	Dab1	0.252265	0.125067	1.98713	2.38697
	Darc	0.425693	0.550484	3.40112	2.51832
	Dclk3	1.52713	1.1266	3.29423	2.47781
	Dcn	39.8258	56.945	322.366	419.547
	Ddx25	1.00947	0.967822	3.75223	2.53598
	Ddx58	1.68745	1.76464	5.49764	6.1133
	Degs2	12.1612	13.5829	26.8875	25.098
	Dennd1c	0.395837	0.155347	0.931666	1.06364
	Dennd3	0.429834	0.535583	0.87358	1.32185
	Derl3	0.505752	0.623115	3.50953	2.26238
	Dgkh	0.0937176	0.0963806	1.12015	1.00864
	Dkk4	0.294512	1.03182	56.6682	99.2673
	Dnahc8	0.606708	0.699931	1.76558	1.56625
	Dnajc6	0.857085	1.24784	7.15969	8.31099
	Doc2b	2.8077	2.8295	9.37571	9.32739
	Dock4	0.849037	0.917027	1.68036	1.96132
	Dpf1	1.68479	2.16437	6.05873	4.185
	Drp2	0.485615	0.497579	2.71224	2.22913
	Duox1	0.648791	0.610796	1.32755	1.47471
	Dusp18	0.626931	0.615422	1.3932	1.55209
	Dusp6	40.821	73.377	251.653	265.623
	E130008D07Rik	0.600037	0.356869	2.61023	3.31963
	Ecscr	0.357388	0.866429	2.70124	3.73124
	Edar	23.6535	25.9801	155.67	170.769
	Ednra	0.341496	1.02706	2.36777	2.96827
	Efha2	2.87027	3.60021	6.69297	8.64907
	Eif4e3	4.33291	4.28656	11.9971	13.1838
	Elovl2	0.369689	0.424089	1.56995	1.32547
	Enc1	6.15454	8.02701	14.4741	17.5616
	Entpd3	0.438734	0.278617	0.946413	1.88433
	Epb4.1l2	8.1054	8.88615	42.6431	43.9206
	Erg	0.165456	0.357077	0.892522	1.22272
	Ern1	3.38412	3.3894	12.1259	12.1525
	Etv4	13.4314	12.8512	26.537	35.3706
	Etv5	9.11769	9.96932	26.4482	30.3284
	Exoc3l4	1.78346	1.59318	5.27374	5.07863
	Exoc6	1.28778	1.31868	4.06056	3.73159
	Fabp5	209.937	203.695	563.578	574.432
	Fads2	9.20245	9.6516	37.2785	23.1327
	Fam107b	10.2646	11.1112	44.4397	40.0398
	Fam124a	0.500203	0.540023	1.51059	1.26085
	Fam13a	9.2503	8.78949	53.7385	54.3494
	Fam174b	0.877276	1.16537	2.32944	1.87724
	Fam184a	0.582833	0.750296	2.03083	2.14322
	Fam187b	1.09955	1.55801	3.03454	2.93421
	Fam19a5	1.14766	1.31371	3.93914	3.74887
	Fam211a	2.3756	2.46251	6.73461	6.56111
	Fam25c	0.820405	2.18901	13.806	13.6254
	Fgd2	2.62236	3.46347	7.18428	6.53986
	Fgd5	3.73306	4.7537	15.4652	14.0858
	Fgf20	0.129127	0.765805	11.0795	20.6637
	Figf	7.17928	6.196	29.0629	23.6785
	Fjx1	8.05765	8.69578	26.5222	26.2606
	Fkbp11	10.7697	11.2662	30.9346	25.9501
	Fkbp1b	1.45072	2.00887	3.24554	4.8694
	Fkbp5	17.8555	19.5235	48.5977	39.2087
	Fkbp7	1.15139	2.47926	6.21887	7.41571
	Fmn2	1.6905	1.86954	5.36673	4.32514
	Fn1	43.5529	53.409	328.388	300.817
	Foxi3	21.3638	26.5267	101.115	103.877
	Foxp1	7.18484	8.39522	18.4901	21.7684
	Fras1	10.3434	9.97426	36.808	32.5447
	Frem1	3.22083	4.32176	50.7922	54.5951
	Fsd1	0.74905	0.981112	5.71576	4.18725
	Fut10	4.20768	3.3185	7.02887	8.77703
	Fut2	0.351685	0.36092	1.86508	1.16262
	Fzd10	30.7335	31.4238	113.646	132.142
	Gad1	0.0829957	0.149326	5.22198	7.21428
	Gadd45g	24.3825	24.4783	63.7269	64.286
	Galnt12	1.94222	2.5417	15.2027	14.5147
	Galnt14	1.80455	1.98725	9.73354	8.06808
	Galnt16	1.67207	2.29323	6.5554	5.14551
	Galnt4	2.31564	2.55616	6.03031	6.61898
	Galnt6	0.644785	1.22641	6.88348	6.29386
	Galnt7	1.58536	1.90932	4.75663	4.16903
	Gata2	0.137788	0.356988	0.980881	1.34142
	Gata6	1.31612	1.11848	3.17142	2.53146
	Gbp6	0.0408849	0.15451	2.07238	1.88335
	Gdf10	0.253183	0.624561	2.22402	1.76083
	Gfpt2	0.661403	0.746397	1.16742	1.88161
	Gfra2	0.617514	0.777768	1.27656	1.87862
	Gfra4	0.536876	0.916747	9.51819	8.28869
	Glipr2	0.41133	1.33138	3.15592	3.65586
	Glis2	6.60714	7.42491	14.5436	13.8342
	Glul	31.042	22.3837	61.7268	55.9976
	Gm129	2.33914	2.52197	5.64368	5.02641
	Gm14403	1.1481	1.39448	3.25045	2.99374
	Gm1673	3.47517	2.02847	10.9586	7.72185
	Gm5424	45.9781	41.0246	112.506	123.659
	Gm8801	1.89139	3.91973	5.80028	6.31872
	Golga7b	9.02884	8.09259	39.1169	38.3751
	Gpc1	49.9438	54.7579	133.263	129.102
	Gpc2	8.95468	6.54675	21.0338	23.103
	Gpc3	78.2309	78.8521	212.323	220.265
	Gpr173	1.05713	0.840875	2.25045	2.51488
	Gpsm1	4.06827	4.69192	8.92714	8.74402
	Gpx3	0.25045	0.337595	4.18964	1.63359
	Gramd4	14.1197	14.6744	31.6938	31.5666
	Grasp	39.4109	39.4557	80.9898	86.0648
	Grb10	6.70498	8.00361	59.7417	58.0206
	Greb1	2.43561	3.33074	8.57809	8.06161
	Grhl3	5.02821	3.95665	26.5247	27.1849
	Gria3	0.135069	0.145858	1.09244	1.438
	Grik3	0.283778	0.739856	16.84	15.3405
	Grtp1	1.4038	1.1947	4.30679	3.98452
	Gsdma	1.09264	0.75048	2.96444	4.2023
	Gsg1l	0.428859	0.633625	2.58042	2.04032
	Gsta4	13.2036	12.2698	52.5581	50.5947
	Gtf2ird1	53.1521	53.1043	102.956	109.579
	Gxylt2	1.73394	2.14556	5.94316	5.49877
	H19	142.547	137.789	378.921	377.386
	H2-Ab1	4.19493	2.39344	36.5867	16.7439
	H2-K1	7.66164	11.1618	32.4554	36.6944
	H2-T10	0.778166	2.32525	3.31881	3.7638
	Has3	18.0935	18.4712	162.956	157.553
	Heg1	4.13759	5.24231	15.1117	15.0555
	Herc3	3.0867	3.53386	6.51725	7.04615
	Hhipl1	0.208493	0.337535	3.11125	2.29582
	Hic1	0.138196	0.327663	3.13504	3.5974
	Hif3a	6.70255	7.592	30.1013	26.9978
	Hoxc4	8.01622	9.05092	19.1589	22.2065
	Hoxc5	3.2728	3.92497	8.59419	7.75927
	Hoxc9	0.381492	0.529059	2.11716	1.42174
	Hs3st3a1	0.427836	0.437618	2.69569	3.36633
	Hs6st2	0.308682	0.25636	1.28015	1.28018
	Hspa2	2.46092	2.89783	21.4961	17.7587
	Ica1l	0.219093	0.236539	1.15525	1.05797
	Icam1	14.3566	17.7685	35.0967	41.4783
	Id2	16.2752	15.7312	38.0255	38.5499
	Id3	48.7541	49.1569	126.381	124.582
	Ifitm1	0.783939	1.34872	23.7285	20.7549
	Ifitm3	34.8284	42.8574	279.635	310.071
	Ifngr2	21.0404	18.9102	37.7228	42.6207
	Iglon5	0.388272	0.609527	1.75154	1.28878
	Igsf9b	0.458225	0.449799	1.6398	1.55685
	Ikzf2	0.642156	0.47562	0.979268	1.29145
	Il23a	0.212593	0.381991	3.82458	4.19132
	Il2rg	2.04804	3.21856	9.78804	12.4164
	Ildr2	0.07342	0.0906286	16.5121	14.0367
	Irak1bp1	2.25531	3.59656	6.57481	5.54178
	Itga9	0.211124	0.621761	1.42379	1.18718
	Itpr1	0.515846	0.566632	1.69692	1.88424
	Jph4	0.412135	0.296678	1.0371	0.989315
	Kalrn	2.02253	2.30178	6.97589	6.04583
	Kcnd3	0.0466693	0.0654566	2.11255	0.905908
	Kcnh2	1.65273	2.03301	8.73171	8.18244
	Kcnh3	1.63813	1.68816	9.71746	8.11171
	Kcnip1	0.121579	0.131823	14.0802	17.971
	Kcnip2	3.30977	2.00471	7.8881	5.84072
	Kcnk1	2.89012	2.60612	12.5572	13.699
	Kcnmb4	16.793	17.5464	56.688	51.801
	Kcnn1	0.56902	0.661637	3.5169	2.85329
	Kcnn3	0.22786	0.221492	2.85014	2.4356
	Kcnq4	2.23962	2.61202	12.0022	11.6192
	Kctd12	10.229	13.1006	60.7609	55.6416
	Khdrbs3	5.49097	5.50062	14.1771	11.6804
	Klhl13	4.16198	5.06203	11.4324	12.0592
	Klk13	0.681318	0.314542	2.94303	3.38763
	Kremen2	15.4122	16.5829	204.175	217.116
	Krt16	1.99561	1.95649	4.37266	3.89172
	Krt27	0.800974	0.597994	1.4629	2.2505
	Krt6a	0.323972	0.393297	4.45633	3.52077
	Krt7	6.61365	7.77517	19.9977	18.2391
	L1cam	1.78929	2.03958	4.7346	3.91645
	Lama4	2.30943	3.41377	5.65007	6.52289
	Laptm4b	13.4023	8.91795	23.2223	23.6471
	Lbh	19.6624	19.7111	64.76	62.8809
	Lef1	8.44271	7.7009	83.4398	86.521
	Lgi2	1.53866	1.55623	7.62651	7.85994
	Lhpp	4.28639	4.36954	14.5744	13.8891
	Limch1	1.30243	1.78799	23.1993	22.9685
	Lmo2	0.24999	0.743026	1.50519	1.84853
	Lmx1a	0.106935	0.0865812	3.43133	1.95196
	Lor	0.419832	0.452873	11.1558	5.476
	Lrp3	6.13919	4.34611	11.5689	10.5938
	Lrp4	31.5733	34.7106	154.138	163.961
	Lrrc42	47.8053	45.537	108.629	107.859
	Lrrc55	0.744179	0.702864	1.70578	1.34771
	Lrrc56	7.54863	7.49571	16.5744	15.6008
	Lrrk2	0.484268	0.545792	0.930842	1.28081
	Ltb4r1	0.413795	0.594848	2.67984	2.39937
	Ltb4r2	0.797175	0.931174	3.44165	2.77332
	Ly6g6e	3.30482	3.74858	19.4375	16.0405
	Mafa	2.58602	1.8906	5.78429	4.33931
	Maff	5.43973	8.55045	23.9822	18.4699
	Magi3	3.03453	3.91779	11.7002	11.3178
	Man1a	6.74388	6.27269	33.1725	35.4864
	Map1b	4.5196	6.51463	11.2114	11.8833
	Map2	1.87035	2.25945	5.45263	4.93158
	Map4k1	1.94158	2.27625	4.73047	4.71429
	Mapk11	1.74986	1.96882	6.58694	6.27923
	Mapk4	0.438718	0.741489	10.9438	12.0358
	Marveld3	2.29533	2.0135	5.5785	7.06891
	Matk	0.323877	0.640475	1.28148	1.68981
	Mef2a	22.6958	24.8695	51.2926	60.9015
	Meis3	5.29711	4.07334	10.7527	11.9485
	Metrnl	2.02464	1.94666	5.8773	5.18437
	Mfsd2a	7.85579	9.81256	25.3344	24.7218
	Mgarp	0.63527	0.599754	3.25049	3.03685
	Mill1	4.34108	4.8425	16.607	14.6517
	Mlec	83.7259	91.2434	359.598	343.473
	Mme	5.80969	4.90147	37.1895	28.9576
	Mpp3	0.411048	0.273034	1.29606	1.48425
	Mpped1	4.41956	5.80821	62.1775	61.4183
	Mpped2	0.441445	0.659709	3.9742	3.01101
	Msi1	12.8883	13.1743	31.2466	29.4289
	Msx2	6.57798	7.28102	17.1698	16.2348
	Murc	0.225484	0.340599	1.1191	1.1763
	Mybpc1	0.158085	0.558292	10.8477	16.8894
	Mycl1	10.0851	9.95302	60.2381	57.7321
	Mylip	11.5568	11.6951	31.5538	32.8062
	Myo5b	0.366705	0.311176	1.42638	1.02434
	N4bp2l1	3.163	2.25738	7.29827	6.17747
	Nap1l5	0.489983	0.687181	4.44102	4.60128
	Nbeal2	1.31717	1.39083	3.43408	2.81886
	Nceh1	0.561844	0.671662	1.53646	1.08128
	Ncf1	0.0995245	0.286455	0.96622	1.44195
	Nell2	0.185444	0.0571992	5.37188	2.80934
	Nes	3.1044	3.38339	7.63202	5.6186
	Nfasc	0.442639	0.597112	0.912224	1.17475
	Nfe2l3	2.70849	2.7693	11.6487	12.5785
	Nfkbia	52.2122	62.5077	178.801	197.455
	Nfkbie	0.751538	1.09492	2.5944	1.82941
	Ngf	1.32174	1.32223	8.25789	10.5311
	Nhlrc1	2.18973	1.84742	3.69386	4.70742
	Nin	20.8592	20.7062	56.3085	62.6274
	Nkd1	4.43815	5.91841	18.4984	19.6602
	Nnat	4.34886	5.84339	150.765	135.052
	Notch3	4.2244	4.84562	15.8783	13.8496
	Notum	1.3711	1.18345	17.752	16.3719
	Nptx2	4.86812	4.18016	32.5056	31.2614
	Nr2e3	0.184802	0.199384	1.1465	1.28544
	Nr3c2	0.151442	0.210233	2.49661	3.30948
	Nrp2	63.2956	62.7932	154.708	137.255
	Nsmaf	8.17603	9.12833	16.7604	17.9653
	Ntng1	0.87577	0.86074	2.20597	2.10214
	Ntng2	0.296452	0.191833	6.73622	4.82312
	Nup210	15.0638	16.2693	37.5774	42.3552
	Nupr1	2.55312	1.95939	5.1279	6.99079
	Ocln	1.0648	0.756225	2.47836	2.19214
	Ogdhl	5.76041	5.187	15.3514	13.9658
	Olfm1	3.48378	2.71696	22.3179	17.6974
	Optn	1.28215	1.34299	2.07476	3.21283
	Osbpl3	4.41426	4.05568	13.0956	10.7307
	P4ha2	8.37839	8.25326	23.856	17.9776
	Padi3	0.262944	0.28384	3.71858	3.9618
	Padi4	0.239809	1.0353	2.62384	4.40767
	Pak6	3.28991	4.28538	8.77603	11.3563
	Paqr8	0.658131	0.667565	2.38741	2.28802
	Parm1	16.9925	17.1439	53.4287	47.3537
	Pcdh19	1.71494	1.61868	6.04667	6.90369
	Pcdh7	1.89847	1.9763	3.77615	5.37445
	Pcsk5	1.39988	1.74737	3.19741	3.17767
	Pcyt1b	1.7298	2.12085	4.39161	4.51018
	Pde4b	4.62877	4.94099	13.7617	13.1589
	Pde4d	2.91044	3.23659	16.0909	15.5401
	Pde5a	3.25965	3.04546	6.68125	7.48665
	Pde9a	3.88334	4.86358	9.15353	9.77823
	Pdgfa	187.965	183.588	430.257	403.466
	Pdgfc	13.1545	15.515	28.0206	31.9888
	Pdpn	2.48184	1.93665	11.5671	10.561
	Pdzrn3	13.8656	15.4592	52.2923	40.0091
	Pdzrn4	0.105114	0.0567381	1.33216	1.27916
	Pfn2	33.1171	29.0283	126.317	109.061
	Phc1	5.81563	6.43092	27.4129	26.3367
	Pkp2	0.311096	0.369379	2.08054	1.29806
	Pkp4	32.7812	34.3303	91.8192	95.1829
	Pla2g4f	0.458469	0.587707	2.00897	0.797047
	Plcb4	0.793788	0.597306	3.45047	2.92707
	Pld5	0.0546866	0.177114	1.26261	0.822692
	Plekhh1	0.257079	0.32148	1.70709	1.45808
	Plgrkt	18.7863	19.6847	112.641	128.659
	Plk3	7.4298	8.18413	27.4514	28.1799
	Plxna4	0.273437	0.457822	1.09822	1.093
	Plxnc1	1.07354	1.50595	2.54144	2.85246
	Pnck	0.575808	1.10385	2.07233	2.11444
	Pnmal2	1.17199	1.49552	3.70002	3.03741
	Pnpla3	0.813816	0.756147	3.91883	3.02662
	Poc1b	7.01662	6.03722	14.5665	14.8462
	Ppm1j	0.54464	0.528721	2.17458	1.61027
	Ppp1r36	1.24853	1.41709	3.90081	3.31477
	Ppp1r9a	0.86885	0.987354	1.73707	2.18643
	Prickle1	4.9352	6.21673	11.3222	11.702
	Prkaa2	1.18334	1.11834	2.41525	3.23193
	Prkar1b	4.46801	5.00779	10.826	9.79998
	Prkcz	2.21075	1.94088	4.70163	4.27391
	Prnd	0.309793	0.308345	1.04229	1.66221
	Prokr2	0.0971401	0.167826	2.47236	3.84989
	Prom1	1.78495	2.78459	6.50264	7.98151
	Proser2	1.31594	1.51994	6.13851	5.737
	Prr5l	0.287582	0.221797	1.60945	1.77508
	Prss23	3.43608	4.15802	8.06991	11.1763
	Prss35	24.9886	26.1927	58.8392	48.2608
	Pstpip2	1.17217	1.39573	5.18915	4.1466
	Ptch2	85.486	84.0093	373.078	371.697
	Ptges	1.9979	3.18287	16.9758	16.5185
	Ptk2b	7.26167	8.17245	21.5739	21.9271
	Ptprd	2.97169	3.73438	7.28581	7.99279
	Pvrl3	7.21001	8.62041	25.5903	27.8477
	Pvrl4	10.877	10.2855	20.7286	22.0101
	Pxdn	26.4983	26.2013	53.0742	53.6527
	Rab11fip4	4.72474	5.28468	10.7143	10.0942
	Rab31	2.51087	2.87666	5.08467	5.83477
	Rap1gap2	1.07387	1.23316	2.85835	2.74068
	Rarb	0.520034	0.420978	2.06854	2.0908
	Rasgrp4	0.632409	0.682876	1.62442	2.08139
	Rasl11b	12.0999	16.0728	41.7358	33.5404
	Rassf8	2.86273	3.43746	6.12004	7.32717
	Rassf9	13.1045	12.782	39.3254	35.916
	Rbm38	6.68548	6.70054	21.8695	21.4226
	Rbpms	1.99592	3.4428	10.0797	8.64656
	Relb	3.99821	3.99971	24.1288	23.6085
	Rgag1	1.81765	1.31607	5.44275	4.53501
	Rgl1	2.82665	2.90421	7.47396	7.56869
	Rgs2	6.7992	11.7817	32.5202	31.8845
	Rgs9	1.74706	1.58812	4.8183	4.75496
	Rhbdl2	2.97427	3.03233	7.02945	5.45442
	Rhov	3.00808	4.16262	8.69727	7.30465
	Rhpn1	1.07901	1.25062	3.40598	2.15411
	Rhpn2	1.03641	0.867135	4.77878	5.49525
	Rimklb	0.132163	0.0475659	3.84854	3.59931
	Rltpr	0.652432	0.782365	3.2454	2.52084
	Rnf157	0.982836	1.18373	2.75175	2.39835
	Rnf180	1.03123	1.34111	4.27189	4.72608
	Rnf182	0.515532	0.556559	2.36316	2.50939
	Rnf32	1.97394	2.32021	13.2727	13.8952
	Rnft2	2.39492	2.01616	4.99884	4.74791
	Robo1	32.077	31.7836	90.596	87.2651
	Ror2	0.780464	1.6131	3.0543	2.44207
	Rprm	0.32679	0.704739	8.46496	5.11588
	Rrad	0.240183	0.323781	3.43449	4.07307
	Rragd	0.903998	1.53938	15.4669	16.4084
	Rspo1	0.406037	0.602271	3.17643	2.2949
	Rtn1	0.368078	0.541226	2.32166	2.01977
	Runx2	0.61843	0.524239	5.82529	8.44296
	Rwdd2a	0.330271	0.622902	1.69379	1.29297
	Samhd1	10.6387	11.5023	24.0036	23.5574
	Scamp5	1.42955	1.96683	4.23274	3.50858
	Scube1	1.73645	1.78597	53.2563	54.9974
	Scube3	6.80405	7.60454	36.8259	34.4927
	Sdk1	1.84093	1.9774	4.41972	4.24253
	Sel1l3	0.878479	1.53879	7.41077	6.92253
	Sema3d	3.28559	4.18309	9.54876	12.5357
	Sema4d	6.36637	6.19984	12.5151	13.1678
	Sema5b	0.618444	0.56345	3.12638	2.48597
	Sema6d	1.07737	1.59867	17.5809	20.6798
	Serpina3h	4.94229	7.36851	75.962	48.987
	Serpina3i	1.83882	2.61552	14.0673	10.7549
	Serpina3j	0.277203	0.348922	1.44559	1.6068
	Serpinb10	1.4636	1.90043	3.21859	6.33623
	Serpinb6b	0.45007	0.755264	1.40295	1.73931
	Serpine2	7.62196	8.32048	16.2535	18.0097
	Sfrp5	0.195317	0.368746	2.26553	1.61338
	Sfxn4	0.793099	0.535015	1.28328	1.78106
	Sfxn5	1.43463	1.75889	6.18925	4.39611
	Sh2b2	1.95965	1.19408	4.29586	3.84661
	Sh2d3c	0.623299	0.335611	1.4801	0.721188
	Sh3bp5	5.25268	5.86701	14.2256	12.8371
	Sh3gl3	1.0083	0.797249	6.96509	8.30187
	Sh3rf2	4.15239	5.0989	19.982	21.3021
	Shc2	1.18589	1.13545	3.71632	2.99498
	Shh	10.3702	11.595	142.135	142.884
	Siglec15	0.0977792	0.631971	12.7767	10.7202
	Sipa1l2	3.6831	4.37693	16.4329	15.0641
	Six4	0.0627924	0.237337	1.86214	2.15559
	Slain1	0.461027	0.426521	1.17223	1.20232
	Slc12a5	0.608602	0.657263	2.50016	2.54383
	Slc14a1	0.298027	0.706594	33.3264	36.497
	Slc22a23	1.38086	1.25028	4.31675	3.83047
	Slc25a33	6.18543	6.45931	13.5085	12.994
	Slc2a13	0.439368	0.488894	2.46944	2.59184
	Slc2a4	4.3725	4.16839	10.9823	11.0422
	Slc35d1	7.21215	5.73797	14.7543	14.8087
	Slc35f2	0.705656	0.456955	1.44633	1.41094
	Slc38a1	2.12447	3.09818	12.8321	11.6578
	Slc39a11	6.50222	6.83906	13.919	14.0157
	Slc40a1	8.89175	7.12106	73.5934	71.6469
	Slc43a1	1.20181	1.24831	10.7698	10.0962
	Slc4a11	10.8679	10.8876	41.9471	32.979
	Slc8a2	2.27252	2.90397	32.4908	26.4562
	Smtnl2	2.48262	2.53062	12.0886	12.4696
	Snai3	1.2486	0.833598	4.68413	4.34336
	Sncaip	4.0325	4.85364	13.9082	13.7549
	Snx10	1.36144	1.15161	3.4534	2.87896
	Soga2	2.17778	2.65097	8.78356	8.2813
	Sox21	11.2127	12.4842	53.8649	57.9471
	Sox4	73.0665	80.5446	175.707	167.063
	Sox6	2.07775	2.44229	9.23665	8.69638
	Sp5	1.35975	1.0412	15.6642	14.6443
	Sp6	0.660651	1.42643	10.546	11.1634
	Spo11	5.03619	4.08673	14.2236	17.3866
	Spred3	2.24609	2.18969	5.31518	6.02723
	Spry1	8.7149	11.8059	37.6842	33.4118
	Spry2	20.6343	27.3542	49.3298	46.7678
	Spry4	1.16986	1.94659	5.95656	4.40039
	Sstr1	0.526843	0.494627	1.60581	0.955657
	Sstr2	0.268323	0.31168	3.1612	2.64575
	St6gal1	3.36299	4.81563	18.2148	20.4315
	Ston2	6.78889	8.26611	22.2803	26.5553
	Stx11	0.385024	0.369053	2.83469	4.32363
	Stxbp6	8.11852	7.90706	32.7564	30.1748
	Sult4a1	0.305754	0.371206	2.47386	1.72779
	Susd4	4.48602	4.93791	28.4051	27.0272
	Sv2b	0.296592	0.391462	7.71382	8.28011
	Svopl	0.115541	0.374064	1.08027	1.07145
	Syk	2.82081	2.37726	6.32428	5.59126
	Syne4	1.85019	1.91794	3.61018	4.45647
	Synm	0.512851	0.595404	1.22685	1.36071
	Synpo	10.3812	11.6869	25.2898	20.8394
	Syt5	0.961853	0.8646	5.99688	5.20423
	Syt7	2.83172	3.37961	14.8071	11.835
	Sytl4	0.977366	0.977999	3.85655	3.2323
	Tacstd2	19.334	21.998	49.8994	54.1671
	Tagln3	1.44014	1.27807	3.29267	3.39013
	Tango6	4.03899	4.90095	10.0919	10.01
	Tcp11l1	1.34333	1.55971	2.73372	3.569
	Tekt5	1.97774	1.72188	4.68055	4.63173
	Tenm3	6.49207	7.43008	33.1713	30.8466
	Tenm4	4.38048	5.82694	18.2719	17.2424
	Tex15	0.988835	0.756524	2.05474	1.98715
	Tfap2b	33.8798	37.5863	85.1955	90.5242
	Tfrc	30.2019	23.6398	55.177	58.9588
	Tgm1	0.688055	1.02558	1.80253	2.10774
	Thbs3	1.54575	2.09339	3.97112	3.7133
	Them6	0.767758	0.965871	2.00252	2.78217
	Thsd4	2.15768	2.64028	11.3252	9.68348
	Thsd7b	0.334645	0.527052	2.85684	2.61744
	Tjp1	19.666	21.1624	62.1058	63.0932
	Tjp3	1.47963	1.40553	5.42636	5.76209
	Tll1	5.09608	6.36883	13.9891	14.8358
	Tmc7	2.50974	3.13342	4.77892	6.5439
	Tmeff1	8.1536	8.35742	21.8092	24.7285
	Tmem100	2.59552	1.82841	5.48722	9.6727
	Tmem125	1.34783	0.969345	3.12413	2.34393
	Tmem151b	1.17721	1.56455	15.8399	11.0498
	Tmem181c-ps	8.15694	6.63487	20.0473	20.8319
	Tmem35	0.72494	0.469255	2.65949	2.18516
	Tmem50b	6.34536	7.15833	15.0251	12.8962
	Tmod2	0.331714	0.367729	0.960103	1.04685
	Tnf	1.63169	4.46233	22.1996	35.4741
	Tnfaip3	2.98424	5.6026	32.6374	41.2691
	Tnfrsf19	30.0229	38.2272	171.21	169.232
	Tnfrsf21	6.42221	6.3249	22.5248	22.1582
	Tnik	3.37284	3.79002	17.5185	16.5457
	Tnip1	16.1056	15.1647	32.8149	31.1166
	Traf3	13.4761	13.8005	33.2422	32.3928
	Tram1l1	0.78211	0.799536	2.30931	2.14729
	Trib1	13.735	20.2634	43.3019	42.7855
	Trim46	0.331746	0.557372	2.38658	0.808998
	Tro	0.447787	0.469368	1.40598	1.19286
	Tsku	10.1007	11.5603	29.0416	26.306
	Tspan15	0.665865	0.61238	7.82006	6.77373
	Tspan5	17.9116	18.0262	49.5314	52.7156
	Tspan6	10.5476	10.5199	27.9108	25.6256
	Tspyl5	0.441461	0.428982	1.16648	1.38133
	Ttc28	3.18781	4.22793	9.17173	7.84059
	Tubb2b	6.99184	8.79159	37.4084	41.0884
	Uchl1	1.20523	1.57704	15.8941	15.4284
	Unc13b	3.72534	4.36819	10.1137	9.36745
	Usp13	0.45051	0.324311	1.23486	1.30516
	Vcam1	0.288622	0.453216	1.2169	1.6877
	Vsig10	1.04726	1.1543	2.68249	2.65486
	Vstm4	0.328922	0.781047	1.80953	1.14373
	Wfdc2	3.56661	3.00152	5.53172	8.64297
	Whrn	4.18771	4.66515	16.9249	14.8683
	Wif1	5.79471	9.33544	100.73	102.036
	Wipf1	1.30336	1.9053	3.41675	3.38096
	Wnt10b	12.5778	16.0119	198.622	197.978
	Wnt2b	1.12018	0.940613	3.86616	3.98119
	Wnt3	7.13032	9.0006	39.9433	45.3856
	Wnt7a	1.2113	1.6421	7.86954	8.52125
	Ypel1	3.12781	2.75207	7.81164	9.16204
	Zbtb10	1.43383	1.64933	3.64531	3.48487
	Zcchc18	0.50951	0.666684	1.84206	1.89554
	Zcchc5	0.396299	0.526492	1.97294	2.43794
	Zdbf2	0.602368	0.695049	1.88208	1.82889
	Zdhhc14	0.862539	1.05524	4.31065	4.19866
	Zdhhc2	6.5774	4.47091	22.3841	22.5563
	Zfp105	0.783278	1.04393	2.93305	1.92293
	Zfp184	1.83753	2.23572	5.76631	5.46015
	Zfp462	6.22218	7.17377	14.6145	16.3567
	Zfp534	0.343085	0.43766	1.0093	1.19295
	Zfp566	5.49049	4.24713	20.9467	20.6412
	Zfp57	3.73612	3.62706	12.4366	12.3595
	Zfp618	7.02775	7.99211	15.2628	15.4364
	Zfp647	2.56496	2.94731	5.2238	5.82875
	Zfp750	14.826	15.9752	38.2543	41.3445
	Zfp82	3.71507	3.28157	8.95021	8.07301
	Zfyve28	0.177925	0.0240132	2.78245	2.16505
	Zkscan2	1.34672	1.16335	2.48977	2.9429
