# Supplementary figures and images for: Embryonic attenuated Wnt/β-catenin signaling defines niche location and long-term stem cell fate in hair follicle
Source: eLife journal article supplement (doi:10.7554/elife.10567), 2015-12-14

Figure 1-figure supplement 2.

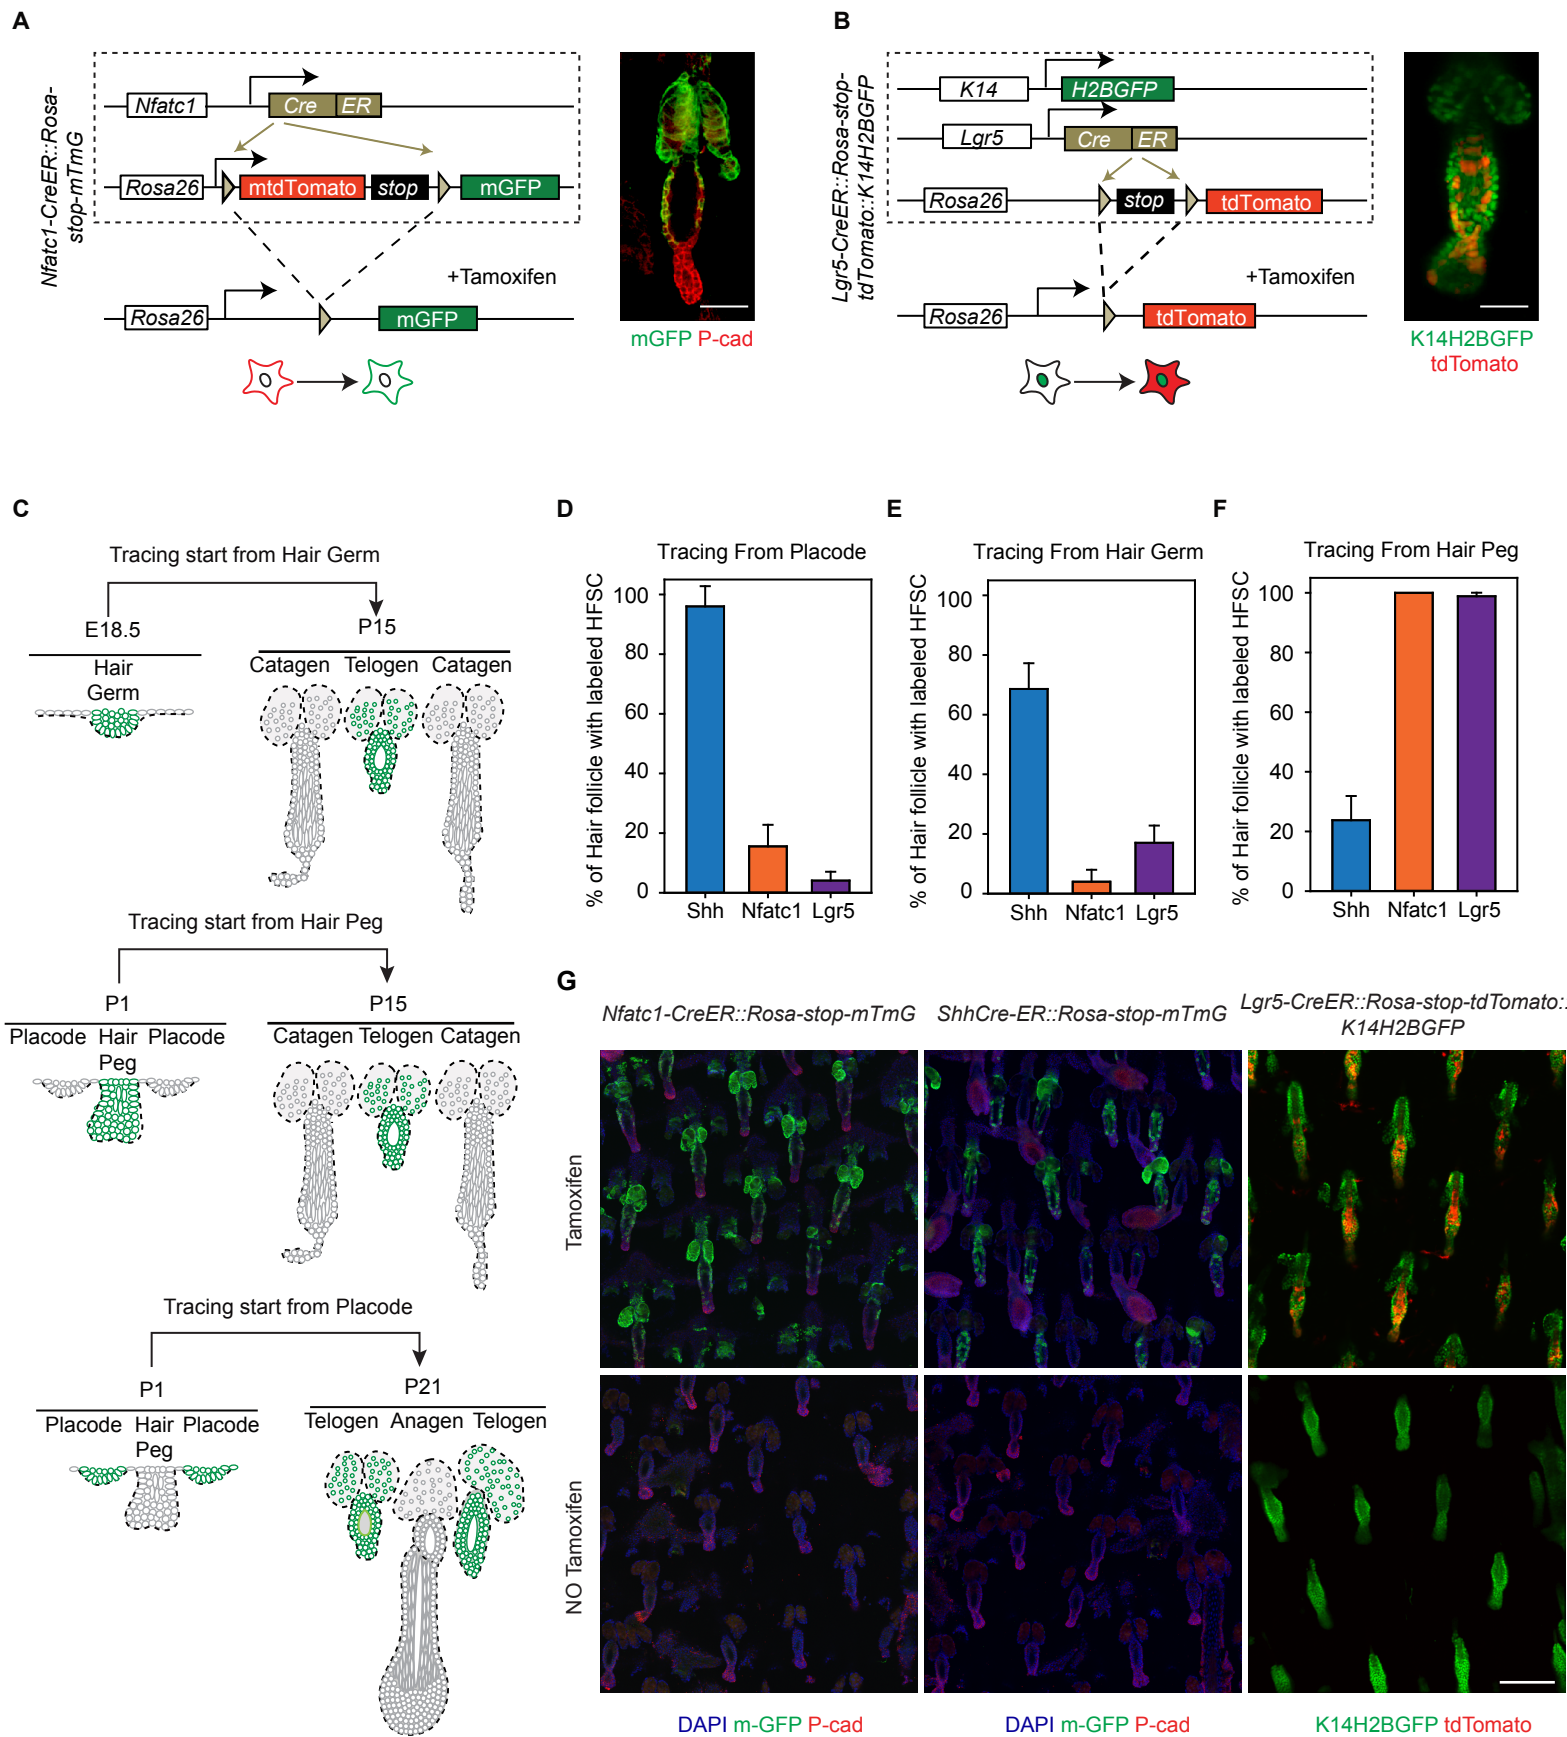

Supplement: supp [file elife-10567-supp-v1.zip]

Figure 1-figure supplement 1.

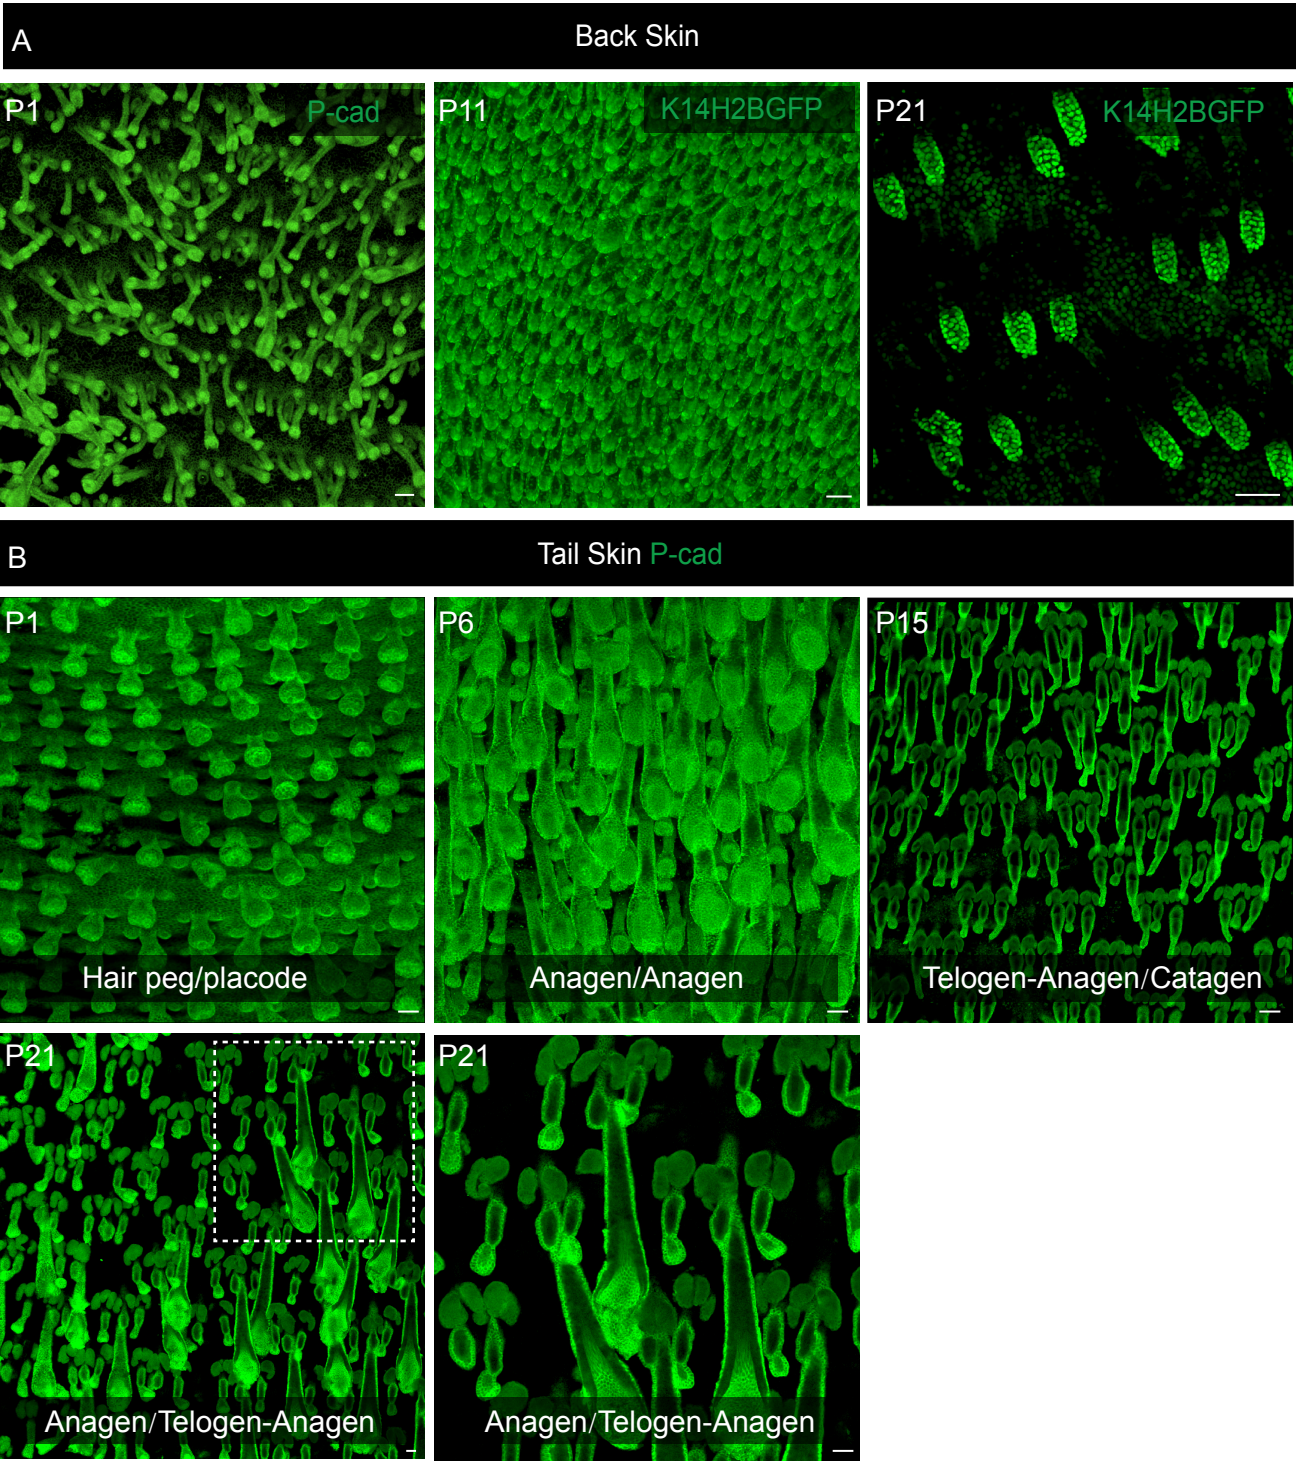

Supplement: supp [file elife-10567-supp-v1.zip]

Figure 6-figure supplement 1.

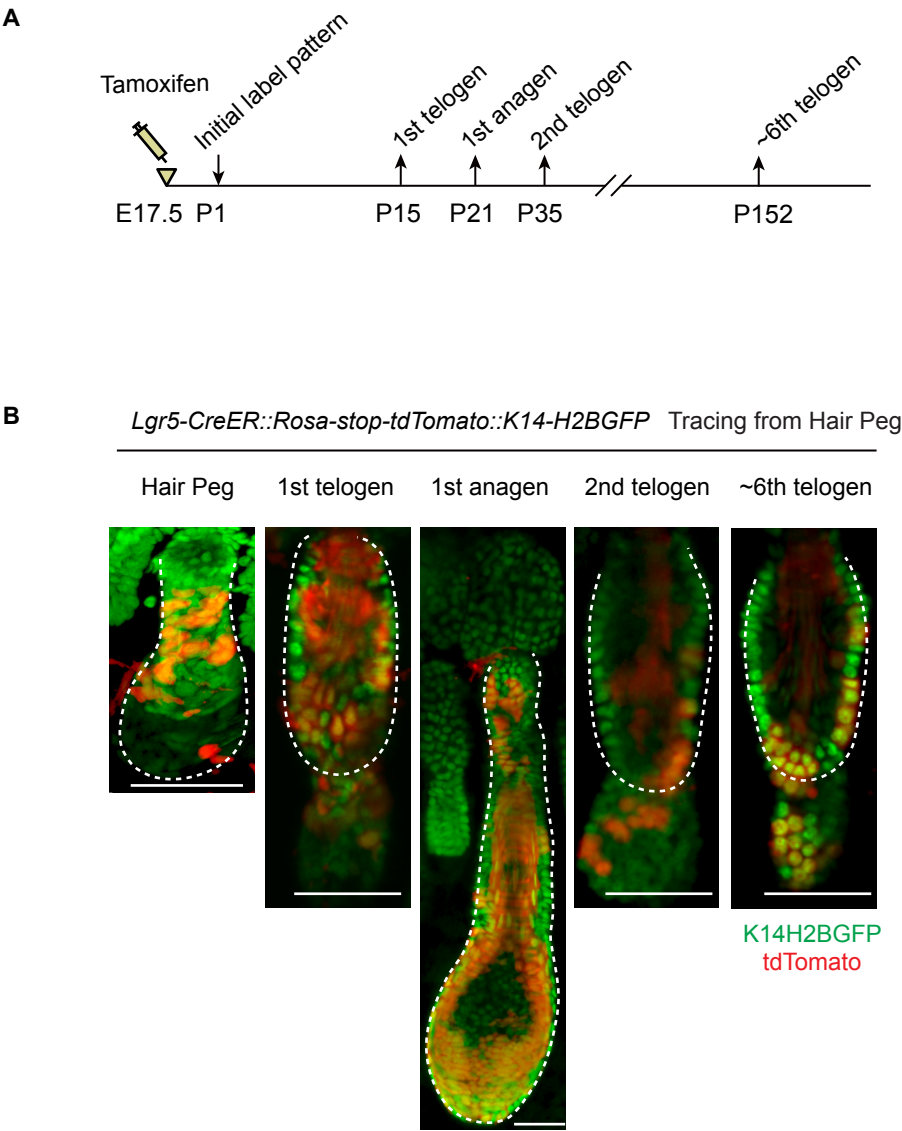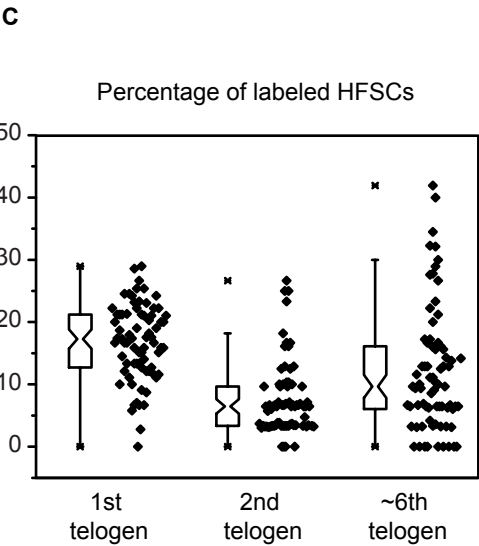

Supplement: supp [file elife-10567-supp-v1.zip]

Figure 2-figure supplement 1.

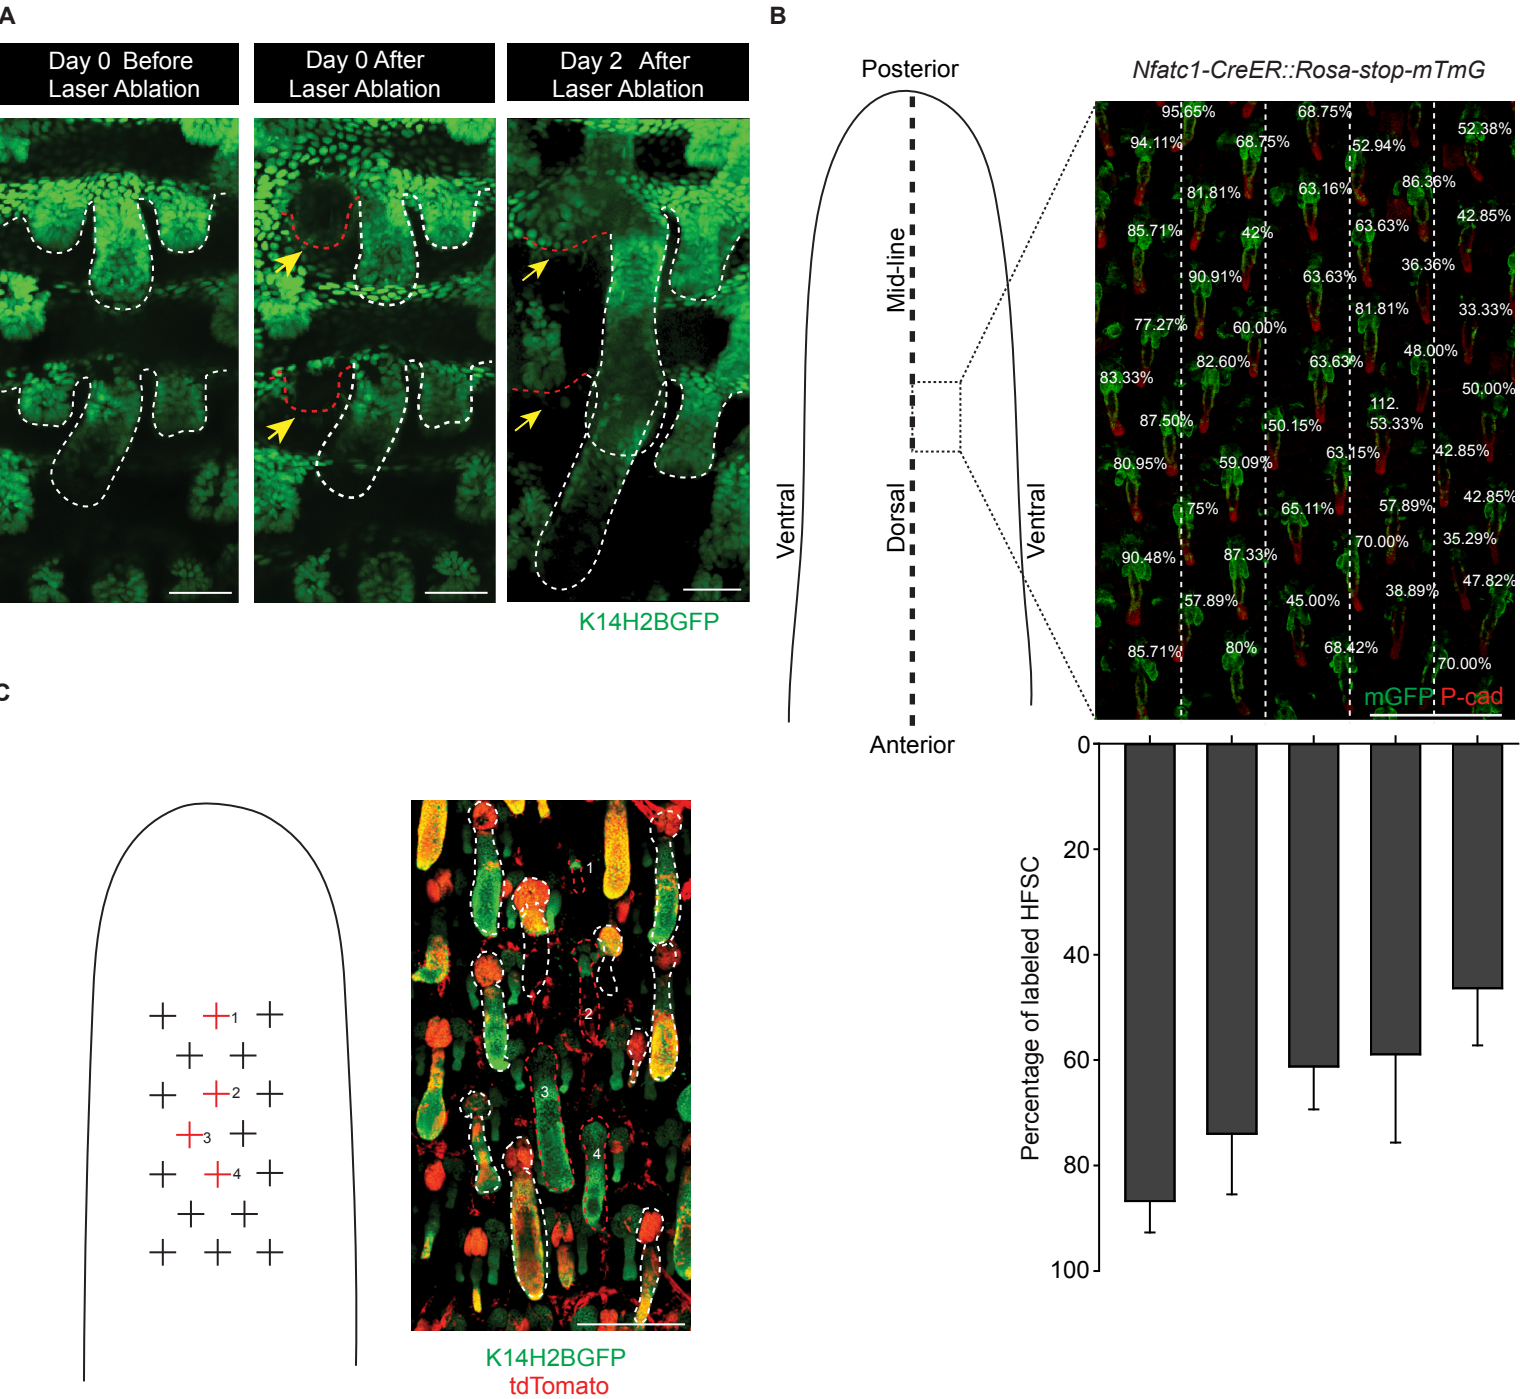

Supplement: supp [file elife-10567-supp-v1.zip]

Figure 5-figure supplement 1.

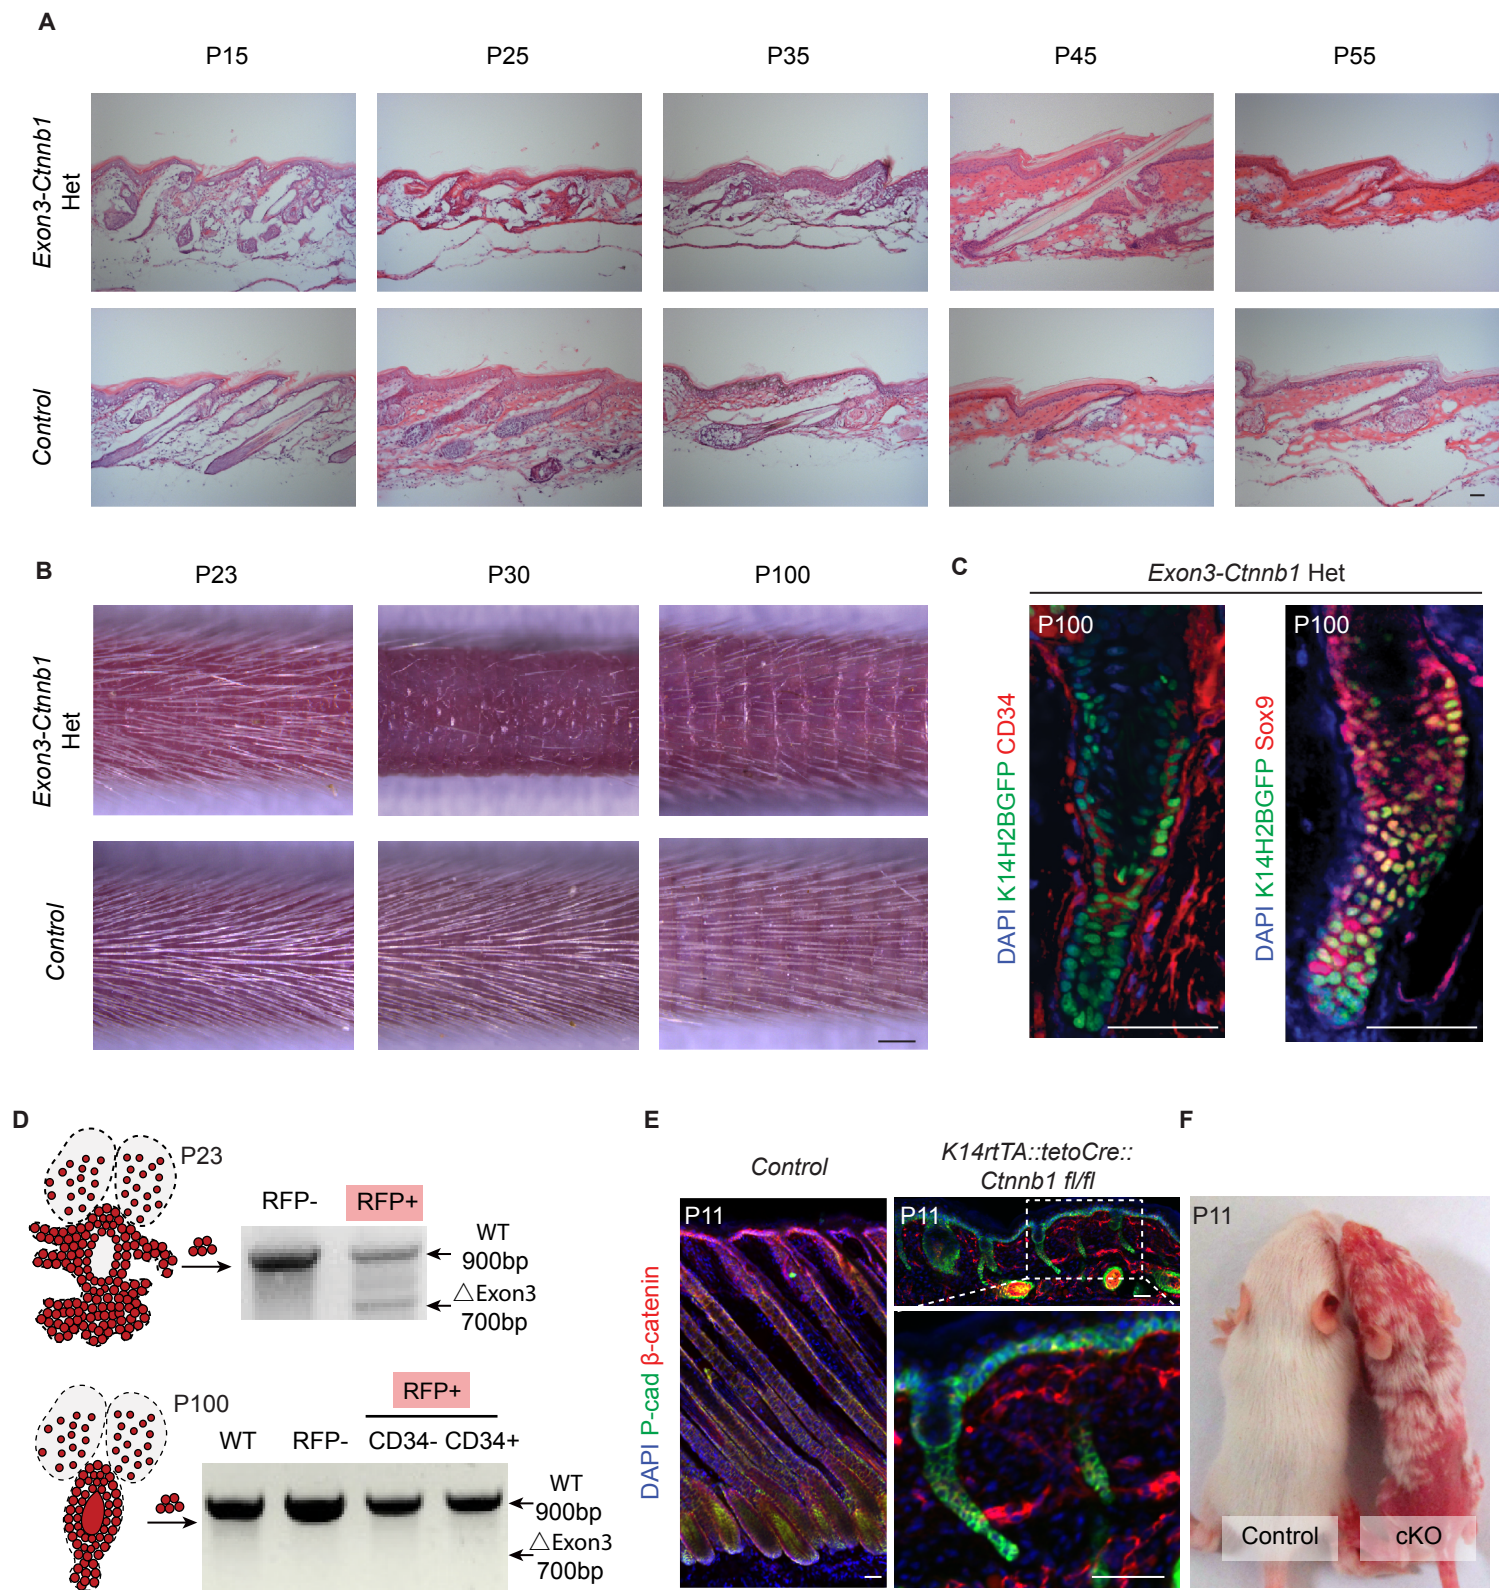

Supplement: supp [file elife-10567-supp-v1.zip]

Figure 3-figure supplement 1.

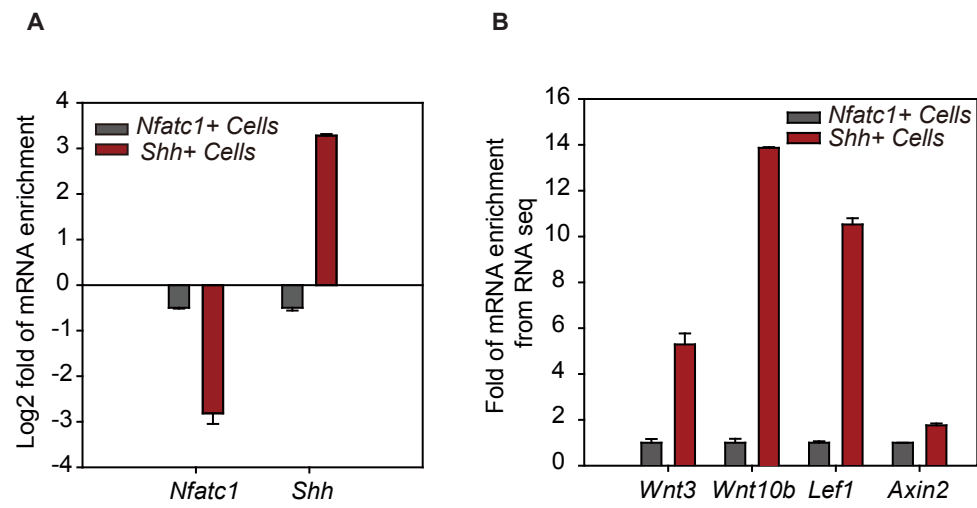

Supplement: supp [file elife-10567-supp-v1.zip]
